# Supplementary material for: Comparative analysis of methods for identifying multimorbidity patterns: a study of ‘real-world’ data
Source: PubMed Central journal article supplement — BMJ Open. 2018 Mar 22;8(3):e018986. doi: 10.1136/bmjopen-2017-018986 (PMC5875653; doi:10.1136/bmjopen-2017-018986), 2018-03-22
Supplement: bmjopen-2017-018986.draft_revisions.pdf [file bmjopen-2017-018986.draft_revisions.pdf]

# BMJ Open

## Comparative analysis of methods for identifying multimorbidity patterns in a South Mediterranean European Region: a cross-sectional study.

|                                 |                                                                                                                                                                                                                                                                                                                                                                                                                                                                                                                                                                                                                                                                                                                                                                                                                                                                                                                                                                                                                                                                |
|---------------------------------|----------------------------------------------------------------------------------------------------------------------------------------------------------------------------------------------------------------------------------------------------------------------------------------------------------------------------------------------------------------------------------------------------------------------------------------------------------------------------------------------------------------------------------------------------------------------------------------------------------------------------------------------------------------------------------------------------------------------------------------------------------------------------------------------------------------------------------------------------------------------------------------------------------------------------------------------------------------------------------------------------------------------------------------------------------------|
| Journal:                        | <i>BMJ Open</i>                                                                                                                                                                                                                                                                                                                                                                                                                                                                                                                                                                                                                                                                                                                                                                                                                                                                                                                                                                                                                                                |
| Manuscript ID                   | bmjopen-2017-018986                                                                                                                                                                                                                                                                                                                                                                                                                                                                                                                                                                                                                                                                                                                                                                                                                                                                                                                                                                                                                                            |
| Article Type:                   | Research                                                                                                                                                                                                                                                                                                                                                                                                                                                                                                                                                                                                                                                                                                                                                                                                                                                                                                                                                                                                                                                       |
| Date Submitted by the Author:   | 03-Aug-2017                                                                                                                                                                                                                                                                                                                                                                                                                                                                                                                                                                                                                                                                                                                                                                                                                                                                                                                                                                                                                                                    |
| Complete List of Authors:       | Roso-Llorach, Albert; Institut Universitari d'Investigació en Atenció Primària Jordi Gol (IDIAP Jordi Gol), ; Universitat Autònoma de Barcelona, Violan-Fors, Concepción; Institut Universitari d'Investigació en Atenció Primària Jordi Gol (IDIAP Jordi Gol); Universitat Autònoma de Barcelona Foguet-Boreu, Quintí; Institut Universitari d'Investigació en Atenció Primària Jordi Gol (IDIAP Jordi Gol) Universitat Autònoma de Barcelona; Universitat Autònoma de Barcelona Rodríguez-Blanco, Teresa; Institut Universitari d'Investigació en Atenció Primària Jordi Gol (IDIAP Jordi Gol); Universitat Autònoma de Barcelona Pons-Vigués, Mariona; Institut Universitari d'Investigació en Atenció Primària Jordi Gol (IDIAP Jordi Gol); Universitat Autònoma de Barcelona Pujol-Ribera, Enriqueta; Institut Universitari d'Investigació en Atenció Primària (IDIAP-Jordi Gol); Universitat Autònoma de Barcelona Valderas, Jose; University of Exeter Medical School, Health Services & Policy Research Group, Academic Collaboration for Primary Care |
| <b>Primary Subject Heading</b>: | Epidemiology                                                                                                                                                                                                                                                                                                                                                                                                                                                                                                                                                                                                                                                                                                                                                                                                                                                                                                                                                                                                                                                   |
| Secondary Subject Heading:      | Research methods, General practice / Family practice                                                                                                                                                                                                                                                                                                                                                                                                                                                                                                                                                                                                                                                                                                                                                                                                                                                                                                                                                                                                           |
| Keywords:                       | Multimorbidity, Cluster analysis, Factor analysis, Primary health care, Electronic health records, diseases                                                                                                                                                                                                                                                                                                                                                                                                                                                                                                                                                                                                                                                                                                                                                                                                                                                                                                                                                    |
|                                 |                                                                                                                                                                                                                                                                                                                                                                                                                                                                                                                                                                                                                                                                                                                                                                                                                                                                                                                                                                                                                                                                |

SCHOLARONE™  
Manuscripts

## Comparative analysis of methods for identifying multimorbidity patterns in a South Mediterranean European Region: a cross-sectional study.

1. Albert Roso-Llorach. 1. Institut Universitari d'Investigació en Atenció Primària Jordi Gol (IDIAP Jordi Gol), Gran Via Corts Catalanes, 587 àtic, 08007 Barcelona, Spain. 2. Universitat Autònoma de Barcelona, Bellaterra (Cerdanyola del Vallès), Spain.

E-mail: [aroso@idiapjgol.org](mailto:aroso@idiapjgol.org)

2. Concepción Violán. 1. Institut Universitari d'Investigació en Atenció Primària Jordi Gol (IDIAP Jordi Gol), Gran Via Corts Catalanes, 587 àtic, 08007 Barcelona, Spain. 2. Universitat Autònoma de Barcelona, Bellaterra (Cerdanyola del Vallès), Spain.

E-mail: [cviolan@idiapjgol.org](mailto:cviolan@idiapjgol.org)

3. Quintí Foguet-Boreu. 1. Institut Universitari d'Investigació en Atenció Primària Jordi Gol (IDIAP Jordi Gol), Gran Via Corts Catalanes, 587 àtic, 08007 Barcelona, Spain. 2. Universitat Autònoma de Barcelona, Bellaterra (Cerdanyola del Vallès), Spain.

E-mail: [42292qfb@comb.cat](mailto:42292qfb@comb.cat)

4. Teresa Rodriguez-Blanco. Institut Universitari d'Investigació en Atenció Primària Jordi Gol (IDIAP Jordi Gol). Universitat Autònoma de Barcelona, Gran Via Corts Catalanes, 587 àtic, 08007 Barcelona, Spain. E-mail: [trodriguez@idiapjgol.org](mailto:trodriguez@idiapjgol.org)

5. Mariona Pons-Vigués. 1. Institut Universitari d'Investigació en Atenció Primària Jordi Gol (IDIAP Jordi Gol), Gran Via Corts Catalanes, 587 àtic, 08007 Barcelona, Spain. 2. Universitat Autònoma de Barcelona, Bellaterra (Cerdanyola del Vallès), Spain. 3. Faculty of Nursing, University of Girona, Emili Grahit, 77, 17071 Girona, Spain.

E-mail: [mponsv@idiapjgol.org](mailto:mponsv@idiapjgol.org)

6. Enriqueta Pujol-Ribera. 1. Institut Universitari d'Investigació en Atenció Primària Jordi Gol (IDIAP Jordi Gol), Gran Via Corts Catalanes, 587 àtic, 08007 Barcelona, Spain. 2. Universitat Autònoma de Barcelona, Bellaterra (Cerdanyola del Vallès), Spain. 3. Faculty of Nursing, University of Girona, Emili Grahit, 77, 17071 Girona, Spain. E-mail: [epujol@idiapjgol.org](mailto:epujol@idiapjgol.org)

7. Jose M Valderas. Health Services & Policy Research Group, Academic Collaboration for Primary Care, University of Exeter Medical School, Exeter, EX1 2LU, United Kingdom.

E-mail: [J.M.Valderas@exeter.ac.uk](mailto:J.M.Valderas@exeter.ac.uk)

**Corresponding author:** Albert Roso-Llorach. IDIAP Jordi Gol  
Gran Via Corts Catalanes, 587 àtic.08007 Barcelona. Spain.  
Telephone: 0034 93 482 41 24. FAX: 0034 93 482 41 74.  
Web page: [www.idiapjgol.org](http://www.idiapjgol.org).E-mail: [aroso@idiapjgol.org](mailto:aroso@idiapjgol.org)

**Word count:** 3,887

# Comparative analysis of methods for identifying multimorbidity patterns in a South Mediterranean European Region: a cross-sectional study.

## ABSTRACT

**Objective.** The aim was to compare multimorbidity patterns identified with the two most commonly used methods: hierarchical cluster analysis (HCA) and exploratory factor analysis (EFA) in a large primary care database.

**Design** Cross-sectional study. Diagnoses were extracted using 263 blocks (ICD-10). Multimorbidity patterns were identified using HCA and EFA. Analysis was stratified by sex, and results compared for each method.

**Setting and participants** Electronic health records for 408,994 patients with multimorbidity aged 45-64 years in 274 primary health care teams from 2010 in Catalonia, Spain.

**Results** HCA identified 53 clusters for women, with just 12 clusters including at least 2 diagnoses, and 15 clusters for men, all of them including at least 2 diagnoses. EFA showed 9 factors for women and 10 factors for men. We observed differences by sex and method of analysis, although some patterns were consistent. Three combinations of diseases were observed consistently across sex groups and across both methods: hypertension and obesity, spondylopathies and deforming dorsopathies, and dermatitis eczema and mycosis.

**Conclusions** This study provides empirical evidence to demonstrate that multimorbidity patterns critically depend on the method of analysis used. The results suggest applications for each method of analysis used and add information about key aspects that must be considered in future studies on multimorbidity patterns.

**Keywords:** Multimorbidity, Cluster analysis, Factor analysis, Primary health care, Electronic health records, diseases

## Strengths and limitations of this study

- This one of the first studies to compare the two methodologies most commonly used to obtain patterns of multimorbidity, Hierarchical Cluster Analysis and Exploratory Factor Analysis.
- The dual analysis was performed in a large, high-quality database of primary care electronic health records that have been shown to be representative of a much larger population, stratified by sex.
- Internal validation with bootstrap methods provided more robust evidence for the cluster analysis.
- The agglomerative hierarchical clustering forces every unit into a single cluster, is exploratory in nature and different clustering algorithms may produce different results.
- The study is cross-sectional and further studies are needed to analyze the patterns that develop longitudinally as individual patients acquire subsequent comorbidities.

## INTRODUCTION

The reliable identification of patterns of multimorbidity is a critical step in developing health care services sensitive to the health needs of these patients.[1] Recent reviews of multimorbidity patterns have shown that individual studies differ widely in their design and choice of epidemiological and statistical methods, including sampling frameworks and selection criteria, coding systems, eligible diseases, and definition of disease clustering patterns.[2–4] This makes it difficult to draw firm conclusions based on the observations, but it also limits our ability to compare analyses head to head and to evaluate whether one approach may be better suited to the purpose. Therefore, it is difficult to know which are the multimorbidity patterns in order to provide adequate health services according to the population needs.

The most frequent methods used to date have been hierarchical cluster analysis (HCA) and exploratory factor analysis (EFA), which offer very different approaches and solutions.[2,3] Both are descriptive methods to identify association of diagnoses and determine patterns of multimorbidity. HCA obtains the patterns of multimorbidity from the dissimilarities between diseases, while EFA is based on correlations between diagnoses to identify the patterns. The HCA clusters tend to contain diagnoses that are similar to each other (in terms of distances), but dissimilar from the diagnoses in other clusters; no diagnosis can be included in more than one cluster. In contrast, EFA permits inclusion of any diagnosis in more than one factor because there are significant correlations between EFA cluster variables that appear to explain the same factor. In addition, EFA cannot handle binary data properly; these data can be grouped in one factor because the distributions (rather than underlying relationships, as in HCA) are similar. Moreover, the association measure of EFA takes into account both positive and negative matches, while HCA allows for the possibility that one or more health problems can occur conditionally and does not consider the negative matches. After all, we have to bear

1  
2  
3 in mind that EFA is not designed for clustering purposes and it is essentially used for (visual)  
4 exploratory purposes, dimensionality reduction purposes or variables transformation.[5–8]  
5  
6

7  
8 The purpose of this study was to compare multimorbidity patterns identified by HCA and EFA  
9  
10 in adults with multimorbidity aged 45–64 years attended in primary health care in Catalonia  
11 (Spain), and stratified by sex.  
12  
13

## 14 15 **METHODS**

### 16 17 18 **Design, setting and study population**

19  
20 A cross-sectional study was conducted in Catalonia (Spain), a Mediterranean region with  
21 7,434,632 inhabitants, 81% of which live in urban municipalities (2010 census). The Spanish  
22 National Health Service (NHS) provides universal coverage, financed mainly by tax revenue.  
23  
24 The Catalan Health Institute (CHI) manages primary health care teams (PHCTs) that serve  
25 5,501,784 patients (274 PHCT), or 74% of the population; the remaining PHCTs are managed by  
26 other providers. The CHI's Information System for the Development of Research in Primary  
27 Care (SIDIAP) contains the coded clinical information recorded in electronic health records EHR  
28 by its 274 PHCTs since 2006. A subset of records meeting the highest quality criteria for clinical  
29 data (SIDIAP Q) includes 40% of the SIDIAP population (1,833,125 individuals), attended by the  
30 1,365 general practitioners (GPs) whose data recording scores contain information on the  
31 majority of the population of Catalonia, and is highly representative for the whole region in  
32 terms of geography, age, gender and diseases.[9–11]  
33  
34  
35  
36  
37  
38  
39  
40  
41  
42  
43  
44  
45

46  
47 Prevalence of individual conditions varies with age and so does multimorbidity and their  
48 patterns. In order to obtain a more homogenous sample in terms of multimorbidity, we  
49 focussed on individuals aged 45 to 64 years.[12–15] We identified 408,944 individuals aged 45  
50 to 64 years on 31 December 2010 with two or more diagnoses (Appendix 1).  
51  
52  
53  
54  
55  
56  
57  
58  
59  
60

### **Coding and selection of diseases**

Diseases are coded in SIDIAP using International Classification of Diseases version 10 (ICD-10). For this study, we selected all active diagnoses recorded in EHR as of December 31, 2010, except for R codes (symptoms, signs, and abnormal clinical and laboratory findings, not elsewhere classified) and Z codes (factors influencing health status and contact with health services).[16] Non-active diagnoses were excluded, based on the presence of an end date in the EHR. These diagnoses cover a broad list of acute diseases for which the system automatically assigns an end date (e.g., 60 days after the initial diagnosis).

To facilitate management of the diagnostic information, the diagnoses were extracted using the 263 blocks (disease categories) in the ICD-10 structure. These are homogeneous categories of very closely related specific diagnoses. For example, Hypertensive diseases include Essential (primary) hypertension, Hypertensive heart disease, Hypertensive renal disease, Hypertensive heart and renal disease and Secondary hypertension. To obtain consistent and clinically interpretable patterns of association, and to avoid spurious relationships that could bias the results, we considered only diagnoses with greater than 1% prevalence in each sex. All patients with multimorbidity (2 or more coexisting diagnoses recorded in the EHR on 31 December 2010) were included.

### **Variables**

The variables considered were: diagnosis (values: 1 for present, 0 for absent), number of diseases (2, 3, 4, and 5 or more) and sex (women, men) were also recorded for each patient.

### **Statistical analysis**

Data access: Data was obtained from SIDIAP after the study was authorized. All the project's authors could access the database. Cleaning methods: The analysis was limited to SIDIAP-Q, as the sample was representative of the population.[9–11] No missing values were handled as sex and age were recorded for all population. Wrong sex-specific diagnoses codes and diagnoses

1  
2  
3 with inconsistent dates were excluded. An individual with no disease diagnoses record was  
4  
5 considered as disease free.  
6

7  
8 Analyses were stratified by sex. Descriptive statistics were used to summarize overall  
9  
10 information. Categorical variables were expressed as frequencies (percentage) and continuous  
11  
12 as mean (standard deviation, SD) or median (interquartile range, IQR). Two sample test of  
13  
14 proportions and Mann-Whitney test were used to test differences by sex.  
15

16  
17 We identified disease patterns using two approaches: 1) hierarchical cluster analysis (HCA),  
18  
19 and 2) exploratory factor analysis (EFA). Clinical criteria were used to evaluate the consistency  
20  
21 and utility of the final HCA and EFA solutions, based on previously described patterns in the  
22  
23 literature and a consensus opinion drawn from the clinical experience of the research team (4  
24  
25 family physicians, 1 epidemiologist). Clusters and factors in these analyses were considered as  
26  
27 two sets of grouping solutions, which were then assigned to each individual patient. We  
28  
29 considered patients to be associated with a given grouping solution if they had  $\geq 1$  diagnoses in  
30  
31 that solution, allowing for the calculation of the prevalence of each solution in the sample.  
32  
33 Patients could be associated with more than one solution in the same set. We also calculated  
34  
35 prevalence, restricting the assignment of patients to those with  $\geq 2$  diagnoses in the same  
36  
37 solution.  
38

#### 39 40 41 Hierarchical Cluster Analysis

42  
43 The HCA approach assigns diagnoses to groups or clusters, so that diagnoses in the same  
44  
45 cluster are more similar, based on a given measure, to one another than to diagnoses from  
46  
47 different clusters. The Jaccard coefficient was used to measure similarity. This coefficient  
48  
49 considers only the diagnoses that any two patients have and ignores the diagnoses that  
50  
51 neither of them has.[5] As we do not know a priori the number of clusters to retain from the  
52  
53 data, we used agglomerative hierarchical methods to identify possible clustering solutions:  
54  
55 Average linkage, Ward, flexible beta and other methods with less bias, based on  
56  
57  
58  
59  
60



1  
2  
3 nonparametric estimates, such as Single Linkage and Density Linkage. All but Ward and the  
4 flexible beta methods successively chained the observations into one cluster. Therefore, the  
5 Ward method, which minimizes the variance within clusters and produces clusters of similar  
6 sizes, was chosen as the primary method based on dendrograms analysis.[5] Data were  
7 randomly split into test and training datasets, equal in size and analysed separately. We ran  
8 the Ward method on both samples. The semi-partial R<sup>2</sup>, Calinski-Harabasz pseudo-F- and  
9 pseudo-T<sup>2</sup>-statistic criteria for different numbers of clusters were examined.[5] Clustering  
10 solutions were compared between the test and training datasets, taking into account the  
11 number of clusters, Adjusted Rand Index and clinical criteria. After checking algorithm stability,  
12 Ward method was run on the full data set, applying the same criteria to different numbers of  
13 clusters. Results were compared with flexible beta results, with beta values set at -0.25 and -  
14 0.5. The criteria for selecting the number of clusters were the highest adjusted Rand index with  
15 a high number of clusters and a high pseudo T<sup>2</sup> statistic.[5] To assess internal cluster quality,  
16 we applied multiscale bootstrap resampling to obtain an approximately unbiased (AU)  
17 probability. This probability ('p-value') is the proportion of bootstrapped samples that contain  
18 the cluster; larger p-values indicate more support for the cluster.[17]

19  
20  
21  
22  
23  
24  
25  
26  
27  
28  
29  
30  
31  
32  
33  
34  
35  
36  
37 Multidimensional scaling (MDS) considering two dimensions was used to discover the  
38 underlying structure of distance measures between diseases in the cluster analysis. Essentially,  
39 MDS assigns observations to specific locations in a conceptual space such that the distances  
40 between points in the space match the given dissimilarities as closely as possible. We carried  
41 out classical MDS using the distance matrix obtained in the cluster analysis that considered the  
42 Jaccard coefficient as a dissimilarity measure. The conceptual map of the diseases  
43 distinguishes between the intra-disease cluster and the inter-disease cluster. Taking into  
44 account the final cluster's solution and the obtained groups, conceptual maps of the diseases  
45 were created. For a better interpretation of the conceptual map, prevalence of the disease  
46 was represented as the radius of the circle.[18]

### Exploratory Factor Analysis

EFA reduces the observed set of diagnoses to a smaller number of latent factors that account for the correlations between them. As the study variables were dichotomous, the correlation matrix between the diagnoses was computed using tetrachoric correlations. The factorability of the matrix was tested using Bartlett Test of Sphericity and Kaiser-Meyer-Olkin (KMO) Measure of Sampling Adequacy. The extraction of the initial solution was carried out using the principal factors method with squared multiple correlations for the prior communality estimates. The optimal number of extracted factors for the final solution was determined with the Scree plot using the “elbow” rule and setting the percentage of variance equal to 100 percent. Factor loadings were analyzed to identify factor patterns. An oblique rotation, Oblimin, was performed to clarify the factor pattern in order to better interpret the nature of the factors, as we assumed that factors were allowed to be associated with each other. As a rule of thumb, factor loadings greater than or equal to 0.30 in absolute value were considered to be significant.[6]

### Comparing multimorbidity patterns

We compared every cluster and factor solutions across sex groups agreement and the diagnoses included in it.

We considered grouping solutions (HCA vs EFA) from different sets (women vs men) to have the following degrees of similarity: a) perfect, when the solution included exactly the same diseases as another solution in the other comparison group (sex or statistical approach); b) partial, when the solution included a subset of diseases present in a solution in the other comparison group; and c) none, when each and every disease in the solution was part of a different solution in the other group and none was part of the same solution. These groups were named using the abbreviation of sex, method and number (For example, MC1: Men Cluster 1)

We further extracted the common subsets of diseases within partially similar solutions, which together with completely similar solutions gave a comprehensive picture of overlapping cluster and factor analysis solutions.

The analyses were performed using SPSS for Windows, version 18 (SPSS Inc., Chicago, IL, USA), SAS 9.2 for Windows (SAS Institute Inc., Cary, NC, USA) and R version 3.1.2 (R Foundation for Statistical Computing, Vienna, Austria).

## RESULTS

Of 523,656 patients, 408,994 (78.1%) met the multimorbidity criteria; women had a higher multimorbidity prevalence than men (82.2% vs 73.9%, respectively;  $p < 0.001$ ) (Table 1). Both cluster and factor analyses included 79 diagnoses for women and 73 for men.

**Table 1.** Number of diseases, clusters, and factors identified in cluster and factorial analysis for patients 45-64 years-old, stratified by sex (N=523,656)

|                                           | Total, n (%)    | Women, n (%)    | Men, n (%)      |
|-------------------------------------------|-----------------|-----------------|-----------------|
| ≥2 Diagnoses*                             | 408,994 (78.1%) | 217,823 (82.2%) | 191,171 (73.9%) |
| Number of diagnoses*                      |                 |                 |                 |
| 2                                         |                 | 26,106 (12.0%)  | 33,850 (17.7%)  |
| 3                                         |                 | 28,243 (13.0%)  | 33,515 (17.5%)  |
| 4                                         |                 | 28,274 (13.0%)  | 30,356 (15.9%)  |
| ≥5                                        |                 | 135,200 (62.1%) | 93,450 (48.9%)  |
| Median number of diagnoses (IQR)**        |                 | 5 (4-8)         | 4 (3-7)         |
| Number of diagnoses included              |                 | 79              | 73              |
| Number of clusters                        |                 |                 |                 |
| Number of clusters with ≥2 diagnoses      |                 | 12              | 15              |
| Median of diagnoses per clusters (IQR)*** |                 | 2 (2-4)         | 5 (2.5-6)       |
| Number of factors                         |                 |                 |                 |
| Number of factors with ≥2 diagnoses       |                 | 8               | 9               |
| Median of diagnoses per factors (IQR)***  |                 | 5.5 (2.75-7)    | 4 (4-5)         |

Abbreviations: IQR, Inter-quartile range.

\* Two sample test of proportions; all  $p$ -values  $< 0.001$

\*\* Mann-Whitney test;  $P < 0.001$

\*\*\*Median of clusters or factors with ≥2 diseases;  $P < 0.001$

### Hierarchical Cluster analysis

Using HCA with the Ward method, we obtained 53 clusters for women, with just 12 clusters grouping at least two diagnoses for women and 15 clusters for men (Table 1). We describe only the four most prevalent clusters (Table 2). For a complete description of the clusters and dendrograms, see Appendices 2-5.

**Table 2.** Four most prevalent clusters, by sex group (N(women)=217,823; N(men)=191,171)

| Prevalence 1, %*          | Prevalence 2, %† | Blocks of diagnoses                                                                    | Prevalence in group‡, % | Prevalence in cluster, % | AU p-value**        |
|---------------------------|------------------|----------------------------------------------------------------------------------------|-------------------------|--------------------------|---------------------|
| <b>WOMEN</b>              |                  |                                                                                        |                         |                          |                     |
| WC1 <sup>^</sup><br>82.1  | 52.9             | M50-M54:Other dorsopathies                                                             | 35.8                    | 43.5                     | 0.79<br>(0.74-0.85) |
|                           |                  | F40-F48:Neurotic, stress-related and somatoform disorders                              | 27.3                    | 33.2                     |                     |
|                           |                  | M70-M79:Other soft tissue disorders                                                    | 27.0                    | 32.8                     |                     |
|                           |                  | N80-N98:Noninflammatory disorders of female genital tract                              | 24.2                    | 29.5                     |                     |
|                           |                  | M20-M25:Other joint disorders                                                          | 18.6                    | 22.6                     |                     |
|                           |                  | I80-I89:Diseases of veins, lymphatic vessels and lymph nodes, not elsewhere classified | 18.3                    | 22.2                     |                     |
|                           |                  | D10-D36:Benign neoplasms                                                               | 16.2                    | 19.7                     |                     |
|                           |                  | M15-M19:Arthrosis                                                                      | 15.7                    | 19.1                     |                     |
| WC2<br>55.8               | 23.0             | E70-E90:Metabolic disorders                                                            | 37.4                    | 63.4                     | 0.93<br>(0.86-1.00) |
|                           |                  | I10-I15:Hypertensive diseases                                                          | 25.6                    | 45.8                     |                     |
|                           |                  | E65-E68:Obesity and other hyperalimentation                                            | 19.0                    | 34.0                     |                     |
|                           |                  | E10-E14:Diabetes mellitus                                                              | 7.7                     | 13.7                     |                     |
| WC3<br>47.4               | 10.8             | F10-F19:Mental and behavioural disorders due to psychoactive substance use             | 18.7                    | 39.4                     | 0.78<br>(0.73-0.84) |
|                           |                  | E00-E07:Disorders of thyroid gland                                                     | 14.9                    | 31.4                     |                     |
|                           |                  | F30-F39:Mood [affective] disorders                                                     | 14.6                    | 30.8                     |                     |
|                           |                  | M80-M85:Disorders of bone density and structure                                        | 11.3                    | 23.9                     |                     |
| WC4<br>32.3               | 6.4              | J00-J06:Acute upper respiratory infections                                             | 12.6                    | 39.1                     | 0.71<br>(0.66-0.77) |
|                           |                  | K00-K14:Diseases of oral cavity, salivary glands and jaws                              | 12.1                    | 37.3                     |                     |
|                           |                  | L20-L30:Dermatitis and eczema                                                          | 9.3                     | 28.8                     |                     |
|                           |                  | B35-B49:Mycoses                                                                        | 5.7                     | 17.8                     |                     |
| <b>MEN</b>                |                  |                                                                                        |                         |                          |                     |
| MC1 <sup>^^</sup><br>83.8 | 50.4             | E70-E90:Metabolic disorders                                                            | 42.2                    | 50.3                     | 0.69<br>(0.64-0.75) |
|                           |                  | F10-F19:Mental and behavioural disorders due to psychoactive substance use             | 33.6                    | 40.1                     |                     |
|                           |                  | I10-I15:Hypertensive diseases                                                          | 32.5                    | 38.8                     |                     |
|                           |                  | M50-M54:Other dorsopathies                                                             | 27.8                    | 33.2                     |                     |
|                           |                  | E65-E68:Obesity and other hyperalimentation                                            | 14.6                    | 17.4                     |                     |

|                    |      |                                                                                               |      |      |                     |
|--------------------|------|-----------------------------------------------------------------------------------------------|------|------|---------------------|
|                    |      | E10-E14:Diabetes mellitus                                                                     | 14.2 | 16.9 |                     |
| <b>MC2</b><br>57.6 | 24.2 | M70-M79:Other soft tissue disorders                                                           | 16.9 | 29.3 | 0.87<br>(0.84-0.90) |
|                    |      | N40-N51:Diseases of male genital organs                                                       | 12.1 | 21.0 |                     |
|                    |      | M20-M25:Other joint disorders                                                                 | 12.1 | 20.9 |                     |
|                    |      | K20-K31:Diseases of oesophagus, stomach and duodenum                                          | 11.5 | 20.0 |                     |
|                    |      | I80-I89:Diseases of veins, lymphatic vessels and lymph nodes, not elsewhere classified        | 10.0 | 17.4 |                     |
|                    |      | K40-K46:Hernia                                                                                | 8.8  | 15.2 |                     |
|                    |      | D10-D36:Benign neoplasms                                                                      | 8.6  | 14.9 |                     |
|                    |      | M15-M19:Arthrosis                                                                             | 7.7  | 13.4 |                     |
|                    |      | K55-K63:Other diseases of intestines                                                          | 6.4  | 11.1 |                     |
| <b>MC3</b><br>54.1 | 20.7 | F40-F48:Neurotic, stress-related and somatoform disorders                                     | 13.5 | 24.9 | 0.79<br>(0.74-0.84) |
|                    |      | K00-K14:Diseases of oral cavity, salivary glands and jaws                                     | 12.0 | 22.3 |                     |
|                    |      | J40-J47:Chronic lower respiratory diseases                                                    | 9.3  | 17.2 |                     |
|                    |      | J00-J06:Acute upper respiratory infections                                                    | 8.9  | 16.4 |                     |
|                    |      | J30-J39:Other diseases of upper respiratory tract                                             | 8.0  | 14.8 |                     |
|                    |      | L20-L30:Dermatitis and eczema                                                                 | 7.5  | 13.9 |                     |
|                    |      | G40-G47:Episodic and paroxysmal disorders                                                     | 7.4  | 13.7 |                     |
|                    |      | F50-F59:Behavioural syndromes associated with physiological disturbances and physical factors | 6.6  | 12.2 |                     |
|                    |      | F30-F39:Mood [affective] disorders                                                            | 6.3  | 11.6 |                     |
| B35-B49:Mycoses    | 4.1  | 7.6                                                                                           |      |      |                     |
| <b>MC4</b><br>25.2 | 4.7  | H90-H95:Other disorders of ear                                                                | 7.7  | 30.6 | 0.87<br>(0.83-0.91) |
|                    |      | H53-H54:Visual disturbances and blindness                                                     | 3.9  | 15.5 |                     |
|                    |      | B00-B09:Viral infections characterized by skin and mucous membrane lesions                    | 3.5  | 13.9 |                     |
|                    |      | L60-L75:Disorders of skin appendages                                                          | 3.5  | 13.9 |                     |
|                    |      | H10-H13:Disorders of conjunctiva                                                              | 3.0  | 12.0 |                     |
|                    |      | H49-H52:Disorders of ocular muscles, binocular movement, accommodation and refraction         | 2.8  | 11.2 |                     |
|                    |      | L80-L99:Other disorders of the skin and subcutaneous tissue                                   | 2.5  | 10.0 |                     |
|                    |      | L00-L08:Infections of the skin and subcutaneous tissue                                        | 2.1  | 8.3  |                     |
|                    |      | H00-H06:Disorders of eyelid, lacrimal system and orbit                                        | 1.6  | 6.5  |                     |

\*Individuals from the strata  $\geq 1$  diagnosis in the cluster/ † Individuals from the strata with  $\geq 2$  diagnosis in the cluster/‡Strata: same sex

\*\*Approximately unbiased (AU) probability-value

^ Abbreviation of Sex, method and number (WC1: Women Cluster 1)

^^ Abbreviation of Sex, method and number (MC1: Men Cluster 1)

1  
2  
3 Twelve clusters with at least two diseases were identified for women, with prevalences  
4 ranging from 6.6% to 82.1% (median: 15.5%), (WC3; WC10). The clusters identified in men had  
5 prevalences ranging from 3.2% to 83.8% (median 10.1%). The most prevalent cluster included  
6  
7 8 diseases in women (WC1: musculoskeletal, psychiatric, circulatory, gynecological and  
8  
9 neoplasms) and 6 in men (MC1: metabolic and circulatory); about half of all patients had at  
10  
11 least two diagnoses (52.9% of women and 50.4% of men).  
12  
13  
14  
15

16 Two clusters were common to men and women, "Spondylopathies" and "Deforming  
17  
18 dorsopathies" (WC11, MC13) and "Urolithiasis" and "Other diseases of the urinary systems"  
19  
20 (WC9, MC12) (Box 1). The remaining clusters showed partial similarity in men and women,  
21  
22 based on six subsets (Box 2), except for three clusters found only in women (WC3, WC7,  
23  
24 WC10) and six only in men (MC4, MC5, MC8, MC10, MC14, MC15) (Appendices 4-5).  
25  
26  
27  
28  
29  
30  
31  
32  
33  
34  
35  
36  
37  
38  
39  
40  
41  
42  
43  
44  
45  
46  
47  
48  
49  
50  
51  
52  
53  
54  
55  
56  
57  
58  
59  
60

**BOXES****Box 1.** Combinations of diseases consistent in both men and women<sup>§</sup>**Clusters**

## Complete (whole) clusters

1. M45-M49:Spondylopathies\*  
M40-M43:Deforming dorsopathies (WC11;MC13)#
2. N20-N23:Urolithiasis  
N30-N39:Other diseases of urinary system (WC9; MC12)

## Subsets within clusters

1. E65-E68:Obesity and other hyperalimentionation  
I0-I15:Hypertensive diseases  
E10-E14:Diabetes mellitus (WC2; MC1)
2. M15-M19:Arthrosis  
M20-M25:Other joint disorders  
I80-I89:Diseases of veins, lymphatic vessels and lymph nodes, not elsewhere classified  
M70-M79:Other soft tissue disorders  
D10-D36:Benign neoplasms (WC1; MC2)
3. L20-L30:Dermatitis and eczema  
B35-B49:Mycoses  
K00-K14:Diseases of oral cavity, salivary glands and jaws  
J00-J06:Acute upper respiratory infections (WC4; MC3)
4. K70-K77:Diseases of liver  
K80-K87:Disorders of gallbladder, biliary tract and pancreas (WC12; MC7)
5. J30-J39:Other diseases of upper respiratory tract  
J40-J47:Chronic lower respiratory diseases (WC6; MC3)
6. K20-K31:Diseases of oesophagus, stomach and duodenum  
K40-K46:Hernia (WC5; MC2)
7. G50-G59:Nerve, nerve root and plexus disorders  
M65-M68:Disorders of synovium and tendon (WC8; MC6)

**Factors\***

## Subgroups within factors

1. I10-I15:Hypertensive diseases  
I20-I25:Ischaemic heart diseases  
I30-I52:Other forms of heart disease  
I70-I79:Diseases of arteries, arterioles and capillaries (WF3; MF2)
2. I10-I15:Hypertensive diseases  
E65-E68:Obesity and other hyperalimentionation (WF2;MF1)
3. J00-J06:Acute upper respiratory infections  
J20-J22:Other acute lower respiratory infections  
J09-J18:Influenza and pneumonia  
B25-B34:Other viral diseases  
A00-A09:Intestinal infectious diseases (WF4; MF6)
4. M15-M19:Arthrosis  
M45-M49:Spondylopathies  
M40-M43:Deforming dorsopathies  
M50-M54:Other dorsopathies (WF1;MF4)
5. K20-K31:Diseases of oesophagus, stomach and duodenum  
Q38-Q45:Other congenital malformations of the digestive system (WF6;MF8)
6. L20-L30:Dermatitis and eczema  
B35-B49:Mycoses  
H53-H54:Visual disturbances and blindness  
H10-H13:Disorders of conjunctiva  
L80-L99:Other disorders of the skin and subcutaneous tissue (WF5;MF5)
7. H25-H28:Disorders of lens  
H30-H36:Disorders of choroid and retina (WF3; MF7)

\* Coincident disease in both sexes

# Abbreviation of Sex (W: Women; M: Men), method (C: Hierarchical Cluster Analysis; F: Factor Analysis) and number (e.g. WC1: Women Cluster 1)

§ No two full factors were exactly the same for both sexes.

Underlined blocks of diagnosis represent coincident diseases in pattern.

**Box 2.** Combinations of diseases consistent across statistical methods (cluster and factor analysis)§

| <b>Women</b> |                                                                                                                                                                                                              |
|--------------|--------------------------------------------------------------------------------------------------------------------------------------------------------------------------------------------------------------|
| 1.           | <u>I10-I15:Hypertensive diseases*</u><br><u>E65-E68:Obesity and other hyperalimentionation</u><br>E10-E14:Diabetes mellitus (WC2; WF2)#                                                                      |
| 2.           | M15-M19:Arthrosis<br>M50-M54:Other dorsopathies<br>M70-M79:Other soft tissue disorders (WC1; WF1)                                                                                                            |
| 3.           | <u>L20-L30:Dermatitis and eczema</u><br><u>B35-B49:Mycoses (WC4; WF5)</u>                                                                                                                                    |
| 4.           | <u>M45-M49:Spondylopathies</u><br><u>M40-M43:Deforming dorsopathies (WC11; WF1)</u>                                                                                                                          |
| 5.           | K20-K31:Diseases of oesophagus, stomach and duodenum<br>K40-K46:Hernia (WC5; WF6)                                                                                                                            |
| 6.           | K70-K77:Diseases of liver<br>K80-K87:Disorders of gallbladder, biliary tract and pancreas (WC12 ;WF6)                                                                                                        |
| <b>Men</b>   |                                                                                                                                                                                                              |
| 1.           | <u>I10-I15:Hypertensive diseases</u><br><u>E65-E68:Obesity and other hyperalimentionation</u><br>E70-E90:Metabolic disorders (MC1; MF1)                                                                      |
| 2.           | I20-I25:Ischaemic heart diseases<br>I30-I52:Other forms of heart disease<br>I60-I69:Cerebrovascular diseases<br>I70-I79:Diseases of arteries, arterioles and capillaries<br>N17-N19:Renal failure (MC5; MF2) |
| 3.           | J09-J18:Influenza and pneumonia<br>J20-J22:Other acute lower respiratory infections<br>B25-B34:Other viral diseases<br>A00-A09:Intestinal infectious diseases (MC10; MF6)                                    |
| 4.           | H10-H13:Disorders of conjunctiva<br>H53-H54:Visual disturbances and blindness<br>L80-L99:Other disorders of the skin and subcutaneous tissue (MC4; MF5)                                                      |
| 5.           | <u>M45-M49:Spondylopathies</u><br><u>M40-M43:Deforming dorsopathies (MC13; MF4)</u>                                                                                                                          |
| 6.           | <u>L20-L30:Dermatitis and eczema</u><br><u>B35-B49:Mycoses (MC3; MF5)</u>                                                                                                                                    |
| 7.           | K70-K77:Diseases of liver<br>B15-B19:Viral hepatitis (MC7; MF3)                                                                                                                                              |
| 8.           | T08-T14:Injuries to unspecified part of trunk, limb or body region<br>S90-S99:Injuries to the ankle and foot (MC8; MF9)                                                                                      |
| 9.           | H25-H28:Disorders of lens<br>H40-H42:Glaucoma (MC14; MF7)                                                                                                                                                    |

\* Coincident disease in both methods

# Abbreviation of Sex (W: Women; M: Men), method (C: Hierarchical Cluster Analysis; F: Factor Analysis) and number (e.g. WC1: Women Cluster 1)§ All subgroups of factors or clusters, no single cluster exactly the same as a factor.  
Underlined blocks of diagnosis represent coincident diseases in pattern.



The top four clusters were reproduced in the graphical representation of coordinates using MDS. The most prevalent disease clusters were more clearly separated in women than they were in men, mostly due to the overlap of MC2 and MC3 (Figure 1).

### Exploratory Factor Analysis

Using EFA, we obtained nine factors for women and 10 factors for men. In this analysis, the median number of diagnoses per factor was higher in women (Table 1). Two factors explained more than 50% of total variance (58.5% for women (WF2; WF3) and 50.7% for men (MF1; MF2)). All diseases were assigned to single factors except for three diseases, two in women only (J20-J22: Other acute lower respiratory infections and E10-E14: Diabetes mellitus) and one in both women and men (I10-I15: Hypertensive diseases); all three were assigned to two factors. The first four factors are described in Table 3; full factor solutions are shown in Appendices 6-7.

**Table 3.** Four most prevalent factors, by sex (N(women)=217,823; N(men)=191,171)

| Prevalence 1, %*               | Prevalence 2, %† | Blocks of diagnoses**                                    | Prevalence in group, % | Prevalence in factor, % | Variance proportion, % | Cumulative Variance proportion, % |
|--------------------------------|------------------|----------------------------------------------------------|------------------------|-------------------------|------------------------|-----------------------------------|
| <b>WOMEN</b>                   |                  |                                                          |                        |                         |                        |                                   |
| <b>WF1<sup>^</sup></b><br>59.7 | 25.4             | M50-M54:Other dorsopathies                               | 35.8                   | 59.9                    | 10.6                   | 69.1                              |
|                                |                  | M70-M79:Other soft tissue disorders                      | 27.0                   | 45.2                    |                        |                                   |
|                                |                  | M15-M19:Arthrosis                                        | 15.7                   | 26.2                    |                        |                                   |
|                                |                  | G50-G59:Nerve, nerve root and plexus disorders           | 8.5                    | 14.3                    |                        |                                   |
|                                |                  | M45-M49:Spondylopathies                                  | 4.3                    | 7.3                     |                        |                                   |
|                                |                  | M40-M43:Deforming dorsopathies                           | 3.8                    | 6.4                     |                        |                                   |
| <b>WF2</b><br>37.8             | 12.0             | I10-I15:Hypertensive diseases                            | 25.6                   | 67.6                    | 7.0                    | 84.5                              |
|                                |                  | E65-E68:Obesity and other hyperalimentionation           | 19.0                   | 50.2                    |                        |                                   |
|                                |                  | E10-E14:Diabetes mellitus                                | 7.7                    | 20.3                    |                        |                                   |
| <b>WF3</b><br>32.8             | 8.1              | I10-I15:Hypertensive diseases                            | 25.6                   | 78.0                    | 20.2                   | 58.6                              |
|                                |                  | E10-E14:Diabetes mellitus                                | 7.7                    | 23.4                    |                        |                                   |
|                                |                  | I30-I52:Other forms of heart disease                     | 4.4                    | 13.3                    |                        |                                   |
|                                |                  | H25-H28:Disorders of lens                                | 1.7                    | 5.3                     |                        |                                   |
|                                |                  | H30-H36:Disorders of choroid and retina                  | 1.2                    | 3.6                     |                        |                                   |
|                                |                  | I70-I79:Diseases of arteries, arterioles and capillaries | 1.1                    | 3.2                     |                        |                                   |
|                                |                  | I20-I25:Ischaemic heart diseases                         | 1.0                    | 3.1                     |                        |                                   |

|                                 |      |                                                                            |      |      |      |      |
|---------------------------------|------|----------------------------------------------------------------------------|------|------|------|------|
| <b>WF4</b><br>27.6              | 5.9  | J00-J06:Acute upper respiratory infections                                 | 12.6 | 45.8 | 38.3 | 38.3 |
|                                 |      | N30-N39:Other diseases of urinary system                                   | 5.9  | 21.3 |      |      |
|                                 |      | H60-H62:Diseases of external ear                                           | 3.6  | 13.1 |      |      |
|                                 |      | J20-J22:Other acute lower respiratory infections                           | 3.4  | 12.2 |      |      |
|                                 |      | A00-A09:Intestinal infectious diseases                                     | 2.7  | 10.0 |      |      |
|                                 |      | H65-H75:Diseases of middle ear and mastoid                                 | 2.5  | 9.2  |      |      |
|                                 |      | J09-J18:Influenza and pneumonia                                            | 1.7  | 6.1  |      |      |
|                                 |      | B25-B34:Other viral diseases                                               | 1.3  | 4.8  |      |      |
| M60-M63:Disorders of muscles    | 1.2  | 4.4                                                                        |      |      |      |      |
| <b>MEN</b>                      |      |                                                                            |      |      |      |      |
| <b>MF1<sup>^^</sup></b><br>61.7 | 26.1 | E70-E90:Metabolic disorders                                                | 42.2 | 68.3 | 5.1  | 94.8 |
|                                 |      | I10-I15:Hypertensive diseases                                              | 32.6 | 52.7 |      |      |
|                                 |      | E65-E68:Obesity and other hyperalimantation                                | 14.6 | 23.6 |      |      |
|                                 |      | M05-M14:Inflammatory polyarthropathies                                     | 5.4  | 8.7  |      |      |
| <b>MF2</b><br>39.4              | 8.7  | I10-I15:Hypertensive diseases                                              | 32.5 | 82.6 | 28.5 | 28.5 |
|                                 |      | I30-I52:Other forms of heart disease                                       | 6.9  | 17.6 |      |      |
|                                 |      | I20-I25:Ischaemic heart diseases                                           | 5.0  | 12.6 |      |      |
|                                 |      | I70-I79:Diseases of arteries, arterioles and capillaries                   | 2.4  | 6.1  |      |      |
|                                 |      | I60-I69:Cerebrovascular diseases                                           | 1.8  | 4.6  |      |      |
|                                 |      | N17-N19:Renal failure                                                      | 1.5  | 3.7  |      |      |
| <b>MF3</b><br>38.5              | 4.4  | F10-F19:Mental and behavioural disorders due to psychoactive substance use | 33.6 | 87.2 | 5.3  | 89.6 |
|                                 |      | K70-K77:Diseases of liver                                                  | 5.2  | 13.6 |      |      |
|                                 |      | B15-B19:Viral hepatitis                                                    | 3.2  | 8.4  |      |      |
|                                 |      | F20-F29:Schizophrenia, schizotypal and delusional disorders                | 1.1  | 2.9  |      |      |
| <b>MF4</b><br>34.7              | 5.1  | M50-M54:Other dorsopathies                                                 | 27.8 | 80.2 | 7.3  | 77.8 |
|                                 |      | M15-M19:Arthrosis                                                          | 7.7  | 22.2 |      |      |
|                                 |      | M45-M49:Spondylopathies                                                    | 3.1  | 8.8  |      |      |
|                                 |      | M40-M43:Deforming dorsopathies                                             | 1.8  | 5.2  |      |      |

\*Individuals from the strata  $\geq 1$  diagnosis in the factor/ † Individuals from the strata with  $\geq 2$  diagnosis in the factor/#Strata: same sex

\*\*KMO sampling adequacy index was 0.82 for women and 0.75 for men. Bartlett Test of Sphericity was statistically significant. ( $p < 0.001$ ) for both groups

^ Abbreviation of Sex, method and number (WF1: Women Factor 1)

^^ Abbreviation of Sex, method and number (MC1: Men Factor 1)

1  
2  
3 Although no factor-based groupings were identical in men and women, almost all showed  
4 partial similarity by sex, based on seven subsets (Box 1), except for two groups found only in  
5 women (WF7, WF9) and one found only in men (MF9).  
6  
7

#### 8 9 10 Multimorbidity patterns comparison across statistical approaches

11 The EFA multimorbidity patterns were more easily interpreted than the HCA groups, either  
12 because they made more sense from a clinical perspective or because of greater homogeneity  
13 in the diagnoses: about half of the factors containing at least 3 diagnoses corresponded to a  
14 maximum of 2 ICD-10 blocks, compared to about one fifth of the HCA clusters with at least 3  
15 diseases (1/5 for women and 2/11 for men). No grouping solution for women or for men  
16 contained exactly the same set of diseases as a cluster and as a factor. Six clusters (WC3, WC6,  
17 WC7, WC8, WC9, WC10) and two factors (WF7, WF9) were only observed in women. However,  
18 six subsets of diseases were part of the same grouping in both a cluster and a factor (Box 2); all  
19 included two or three diagnoses, usually from the same ICD chapter. Five clusters and one  
20 factor were observed only in men (MC6, MC9, MC11, MC12, MC15 and MF6). Nine subsets of  
21 diseases were observed as part of the same grouping in both a cluster and a factor (Box 2).  
22 They included a range of diseases (2-5) and most frequently included diseases from different  
23 ICD chapters.  
24  
25  
26  
27  
28  
29  
30  
31  
32  
33  
34  
35  
36  
37  
38  
39

40 Three paired diseases were observed consistently in both men and women using both  
41 methods of analysis: 1) Hypertensive diseases and obesity/other hyperalimentation; 2)  
42 spondylopathies and deforming dorsopathies; and 3) dermatitis/eczema and mycoses.  
43  
44  
45  
46  
47  
48  
49  
50  
51  
52  
53  
54  
55  
56  
57  
58  
59  
60

## DISCUSSION

In this study we have observed differences in the groupings identified with the two most frequently used methods (HCA and EFA). No grouping solution contained exactly the same set of diseases as a cluster and as a factor, although some overlap was observed in both groups. Internal quality validation with AU p-values showed strong evidence of the multimorbidity patterns in the data.

The multimorbidity patterns obtained by HCA were identified graphically with MDS, allowing us to observe a given hierarchical structure. Nevertheless, internal quality validation with AU p-values showed strong evidence of the multimorbidity patterns in the data.

EFA, based on tetrachoric correlations where the dichotomous diseases were assumed to come from an underlying mechanism with a continuous variable, produced a wide range of multimorbidity patterns with several levels of correlations. Most of them seem to be highly consistent from a clinical perspective.

The HCA results would be useful in generating new hypotheses for intercluster and intracluster associations between diseases that could be applied to the analysis of multimorbidity, defined as the random coexistence of diseases or clusters that indicates significant associations between diseases without a causal explanation. In future studies, other non-hierarchical cluster analysis techniques will improve measurement of the observed distances and multiple interrelationships between different diseases in a given individual.[19] On the other hand, EFA could be more useful for analyzing multimorbidity patterns in the absence of causal comorbidity and for describing visual representation of diseases correlation with a pathophysiological relationship between them.

We obtained two perfect clusters that were common to both men and women: “spondylopathies and deforming dorsopathies” and “urolithiasis and other diseases of the urinary system”. In the first cluster, spondylosis is a degenerative disorder that may cause loss

1  
2  
3 of normal spinal structure and function and lead to scoliosis. Nevertheless, many individuals  
4  
5 with untreated scoliosis will develop spondylosis; this may be one reason why these diseases  
6  
7 were associated.[20] The second cluster can be explained by the complications produced by  
8  
9 urolithiasis (such as urinary tract infection, persistent proteinuria, stress incontinence or other  
10  
11 unspecified urinary incontinence) and those that have a pathophysiological explanation.[21]

12  
13 EFA showed that the most frequent pattern in women was infectious diseases. This previously  
14  
15 unreported pattern suggests that the multimorbidity patterns obtained in other studies are  
16  
17 affected by the type of diseases included in each study.

18  
19 Although the patterns obtained with both methods did not match exactly, finding matching  
20  
21 pairs of diseases by both methods reinforces the idea that patterns of multimorbidity have a  
22  
23 dominant disease that associates in some way with other diseases.

24  
25 In general, it is difficult to compare our results with other studies because of variations in  
26  
27 methods, data sources and structures, and populations and diseases studied. Six studies have  
28  
29 been performed with HCA[7,19,22–25] and three using EFA.[26–28] Until now, very few  
30  
31 analyses of multimorbidity patterns have used multiple methods to compare the same  
32  
33 population.[19] The latter study included people aged 50 years and older, considering 11  
34  
35 diseases and using 2 different cluster methods, hierarchical (average linkage) and  
36  
37 nonhierarchical (k-medoids), and one method for EFA (principal component analysis). The  
38  
39 observed differences between this study and our results can be explained by differences in the  
40  
41 underlying statistical formulae and diseases considered in both studies.

42  
43  
44 The major strength of this study is the dual analysis (HCA and EFA) of a large, high-quality  
45  
46 database of primary care records that have been shown to be representative of a much larger  
47  
48 population, stratified by sex. Admittedly, this analysis of almost all potential diagnoses may  
49  
50 have added a complexity that will hinder interpretation of findings and comparison with other  
51  
52 studies, particularly because the boundaries between chronic and acute disease are not always  
53  
54 clear.[29,30] Whatever consistency (or discrepancy) we observed was validated by the findings  
55  
56  
57  
58  
59  
60

1  
2  
3 of two different approaches, which helps to identify the most appropriate use of each method  
4  
5 in analyzing multimorbidity. We emphasize that the inclusion of chronic and acute diseases is a  
6  
7 strength and not a weakness. Because, as we have shown, there are many chronic and acute  
8  
9 diseases that coexist at a set time and this has implications for health care.

10  
11 Internal validation with bootstrap methods, AU p-values, and MDS techniques provided more  
12  
13 robust evidence for the cluster analysis. The KMO values obtained show the adequacy of fit of  
14  
15 the factor analysis. These values were similar or higher than previous studies.[26,27]

16  
17 A limitation of this study is our use of agglomerative hierarchical clustering, which forces every  
18  
19 unit (i.e., diagnosis) into a single cluster. HCA is exploratory in nature, and different clustering  
20  
21 algorithms may produce different results.[31] The final clustering solution presented here was  
22  
23 obtained through a systematic and rigorous process: comparing the results from a randomly  
24  
25 split dataset, testing different clustering algorithms, and using different objective numeric  
26  
27 criteria to decide the number of clusters, internal validation, and graphical representation. In  
28  
29 addition, a panel of experts applied subjective clinical criteria to assess the interpretability of  
30  
31 the groupings in everyday practice. Due to the absence of a standard methodology to compare  
32  
33 method solutions we have used ad hoc methodology. Finally, another limitation is our use of  
34  
35 ICD-10 3-character codes as the unit of analysis, rather than the more specific individual  
36  
37 diagnosis, but its use is justified to avoid spurious relationships that more than 10,000  
38  
39 individual codes of the ICD-10 could produce.

40  
41  
42 This is a cross-sectional study, based on EHR of The Catalan Health Institute and SIDIAP-Q is  
43  
44 highly representative for the whole region in terms of both geography, age, gender and  
45  
46 diseases, that avoid selection bias.

47  
48  
49 Multimorbidity can present a problem for health services delivery, affecting patients, health  
50  
51 professionals and managers who are attempting to improve service delivery. Our study offers  
52  
53 two methodological approaches to understanding the relationships between specific diseases,  
54  
55 which is an essential step in improving our approach to this problem. Although we  
56  
57

1  
2  
3 demonstrated that different analytical methods can yield different results, we also showed  
4  
5 that some associations were consistent in both analyses. This study illustrates the need to pay  
6  
7 careful attention to the methods used to support policies and decision-making. Clinical  
8  
9 guidelines tend to focus on a single disease rather than on multimorbidity, which includes not  
10  
11 only diseases but also drug interactions and polypharmacy. The present study confirmed that  
12  
13 multimorbidity patterns are a reality in the adult population, and do not apply only to chronic  
14  
15 diseases. New guidelines are needed that incorporate multimorbidity into clinical  
16  
17 recommendations.

18  
19 This study was one of the first to compare the two most commonly used methodologies, HCA  
20  
21 and EFA, in a large database that includes a large number of diseases. The findings reveal  
22  
23 another limitation to be taken into account in comparing multimorbidity patterns between  
24  
25 studies: in addition to the spectrum, number and type of diseases included, these patterns  
26  
27 vary depending on the method of analysis used.

28  
29  
30  
31 The results suggest that HCA can be useful to detect multimorbidity patterns and identify  
32  
33 different associations between diseases, as the method allows for the possibility that one or  
34  
35 more health problems can occur conditionally. On the other hand, EFA seems more applicable  
36  
37 to clinical practice because places less restrictions in the diseases grouping, so may be better  
38  
39 for generating hypotheses and is more sensitive in identifying clinical associations. Our results  
40  
41 suggest that these aspects be considered in planning of future studies, including selection of  
42  
43 diseases and methods of analysis.

44  
45  
46 Finally, our analysis of multimorbidity patterns only considered associations between diseases.  
47  
48 Further studies are needed to analyze the patterns that develop longitudinally as individual  
49  
50 patients acquire subsequent comorbidities.  
51  
52  
53  
54  
55  
56  
57  
58  
59  
60

## Conclusions

This study offers empirical evidence to demonstrate that multimorbidity patterns critically depend on the method of analysis employed. The results suggest applications for each method of analysis used and add information about key aspects that must be considered in future studies on multimorbidity patterns.

For peer review only



## Footnotes

**Contributors:** All authors contributed to the design of the study, revised the article, and approved the final version. CV and QFB obtained the funding. ARL and CV drafted the article. ARL, CV, QFB, TRB, MPV, EPR and JMV contributed to the analysis and interpretation of data. ARL and CV wrote the first draft, and all authors (ARL, CV, QFB, TRB, MPV, EPR and JMV) contributed ideas, interpreted the findings and reviewed rough drafts of the manuscript. All authors read and approved the final manuscript.

**Funding:** The project has been funded by the *Instituto de Salud Carlos III* of the Ministry of Economy and Competitiveness (Spain) through the Network for Prevention and Health Promotion in Primary Health Care (rediAPP, RD12/0005), by a grant for research projects on health from ISCii (PI12/00427) and co-financed with European Union ERDF funds). Jose M. Valderas was supported by the National Institute for Health Research Clinician Scientist Award NIHR/CS/010/024. The funders had no role in the study design, collection, analysis and interpretation of data, writing of the manuscript or decision to submit for publication. The views expressed in this publication are those of the author(s) and not necessarily those of the National Health Service, the National Institute for Health Research, or the National Department of Health.

**Competing interests:** None declared.

**Ethical considerations:** The study protocol was approved by the Committee on the Ethics of Clinical Research, IDIAP Jordi Gol (Protocol No: P12/28). All data were anonymized and EHR confidentiality was respected in accordance with national and international law.

**Acknowledgment:** We thank the Catalan Health Institute and especially the SIDIAP Unit, which provided the database for the study. The authors also appreciate the English language review by Elaine Lilly, PhD, and are grateful to Carmen Ibáñez for administrative work.

**Availability of data and material:** The datasets are not available because researchers have signed an agreement with the Information System for the Development of Research in Primary Care (SIDIAP) concerning confidentiality and security of the dataset that forbids providing data to third parties. This organization is subject to periodic audits to ensure the validity and quality of the data.

## References

1. Valderas J, Starfield B, Sibbald B, et al. Defining comorbidity: Implications for understanding health and health services. *Ann Fam Med* 2009;**7**: 357–363.
2. Violan C, Foguet-Boreu Q, Flores-Mateo G, et al. Prevalence, determinants and patterns of multimorbidity in primary care: a systematic review of observational studies. *PLoS One* 2014;**9**: e102149.
3. Prados-Torres A, Calderón-Larrañaga A, Hanco-Saavedra J, et al. Multimorbidity patterns: A systematic review. *J Clin Epidemiol* 2014;**67**: 254–266.
4. Fortin M, Stewart M, Poitras ME, et al. A systematic review of prevalence studies on multimorbidity: Toward a more uniform methodology. *Ann Fam Med* 2012;**10**: 142–151.
5. Everitt B, Landau S, Leese M, et al. *Cluster Analysis*. 5th ed. Hoboken: Wiley; 2011.
6. Thompson B. *Exploratory and Confirmatory Factor Analysis: Understanding Concepts and Applications*. Washington, DC: American Psychological Association; 2004.
7. Cornell JE, Pugh JA, Williams J, et al. Multimorbidity clusters: clustering binary data from multimorbidity clusters : clustering binary data from a large administrative medical database. *Appl Multivar Res* 2007;**12**: 163–182.
8. Nunnally J, Berstein I. *Psychometric theory*. 3rd ed. New York: McGraw-Hill, Inc; 1994.
9. Del Mar Garcia-Gil M, Hermosilla E, Prieto-Alhambra D, et al. Construction and validation of a scoring system for the selection of high-quality data in a Spanish population primary care database (SIDAP). *Inform Prim Care* 2012;**19**: 135–145.
10. Prieto-Alhambra D, Judge A, Javaid MK, et al. Incidence and risk factors for clinically diagnosed knee, hip and hand osteoarthritis: influences of age, gender and osteoarthritis affecting other joints. *Ann Rheum Dis* 2014;**73**: 1659–64.
11. Ramos R, Balló E, Marrugat J, et al. Validity for use in research on vascular diseases of the SIDAP (Information System for the Development of Research in Primary Care): the EMMA

- 1  
2  
3 study. *Rev Esp Cardiol (Engl Ed)* 2012;**65**: 29–37.
- 4  
5 12. Foguet-Boreu Q, Violán C, Rodriguez-Blanco T, et al. Multimorbidity Patterns in Elderly  
6  
7 Primary Health Care Patients in a South Mediterranean European Region: A Cluster Analysis.  
8  
9 *PLoS One* 2015;**10**: e0141155.
- 10  
11 13. Foguet-Boreu Q, Violan C, Roso-Llorach A, et al. Impact of multimorbidity: acute morbidity,  
12  
13 area of residency and use of health services across the life span in a region of south Europe.  
14  
15 *BMC Fam Pract* 2014;**15**: 55.
- 16  
17 14. Violán C, Foguet-Boreu Q, Roso-Llorach A, et al. Burden of multimorbidity, socioeconomic  
18  
19 status and use of health services across stages of life in urban areas: a cross-sectional study.  
20  
21 *BMC Public Health* 2014;**14**: 1–13.
- 22  
23 15. Violán C, Foguet-Boreu Q, Roso-Llorach A, et al. Patrones de multimorbilidad en adultos  
24  
25 jóvenes en Cataluña: un análisis de clústeres. *Aten Primaria* 2016; **48**:479-92.
- 26  
27 16. World Health Organization. ICD-10 International Statistical Classification of Diseases and  
28  
29 Related Health Problems 10th Revision. 2007.
- 30  
31 17. Shimodaira H. Approximately unbiased tests of regions using multistep-multiscale  
32  
33 bootstrap resampling 32: *Ann Stat* 2004;**32**: 2616–2641.
- 34  
35 18. Borg I. Modern Multidimensional Scaling: theory and applications (2nd ed.). 2 nd. Springer-  
36  
37 Verlag, editor. New York; 2005.
- 38  
39 19. Islam M, Valderas J, Yen L, et al. Multimorbidity and comorbidity of chronic diseases among  
40  
41 the senior Australians: prevalence and patterns. *PLoS One* 2014;**9**: e83783.
- 42  
43 20. Pappou IP, Girardi FP, Sandhu HS, et al. Discordantly high spinal bone mineral density  
44  
45 values in patients with adult lumbar scoliosis. *Spine (Phila Pa 1976)*. 2006;**31**: 1614–1620.
- 46  
47 21. Bartoletti R, Cai T, Mondaini N, et al. Epidemiology and risk factors in urolithiasis. *Urol Int*  
48  
49 2007;**79** Suppl 1: 3–7.
- 50  
51 22. Formiga F, Ferrer A, Sanz H, et al. Patterns of comorbidity and multimorbidity in the oldest  
52  
53 old: The Octabaix study. *Eur J Intern Med* 2013;**24**: 40–44.
- 54  
55  
56  
57  
58  
59  
60

- 1  
2  
3 23. John R, Kerby DS and Hennessy CH. Patterns and impact of comorbidity and multimorbidity  
4 among community-resident American Indian elders. *Gerontologist* 2003;**43**: 649–660.  
5  
6  
7 24. Marengoni A, Rizzuto D, Wang HX, et al. Patterns of chronic multimorbidity in the elderly  
8 population. *J Am Geriatr Soc* 2009;**57**: 225–230.  
9  
10  
11 25. Newcomer SR, Steiner JF and Bayliss EA. Identifying subgroups of complex patients with  
12 cluster analysis. *Am J Manag Care* 2011;**17**: e324–32.  
13  
14  
15 26. Schäfer I, von Leitner EC, Schön G, et al. Multimorbidity patterns in the elderly: a new  
16 approach of disease clustering identifies complex interrelations between chronic conditions.  
17  
18  
19 *PLoS One* 2010;**5**: e15941.  
20  
21  
22 27. Andre L, Prados-torres A, Poblador-plou B, et al. Multimorbidity Patterns in Primary Care :  
23 Interactions among Chronic Diseases Using Factor Analysis. *PLoS One* 2012;**7**(2): e32190.  
24  
25  
26 28. Poblador-Plou B, van den Akker M, Vos R, et al. Similar multimorbidity patterns in primary  
27 care patients from two European regions: results of a factor analysis. *PLoS One* 2014;**9**:  
28 e100375.  
29  
30  
31  
32 29. O’Halloran J, Miller GC and Britt H. Defining chronic conditions for primary care with ICPC-  
33  
34  
35 2. *Fam Pract* 2004;**21**: 381–386.  
36  
37  
38 30. Lamberts H and Wood M. International Classification of Primary Care. Oxford. Press OU,  
39 editor. Oxford; 2011.  
40  
41  
42 31. Aldenderfer MS and Blashfield RK. Cluster Analysis: Quantitative Applications in the Social  
43 Sciences. 1984.  
44  
45  
46  
47  
48  
49  
50  
51  
52  
53  
54  
55  
56  
57  
58  
59  
60

**Figure 1a.** Top four clusters in women (n= 217,823) aged 45-64 years, analyzed with multidimensional scaling

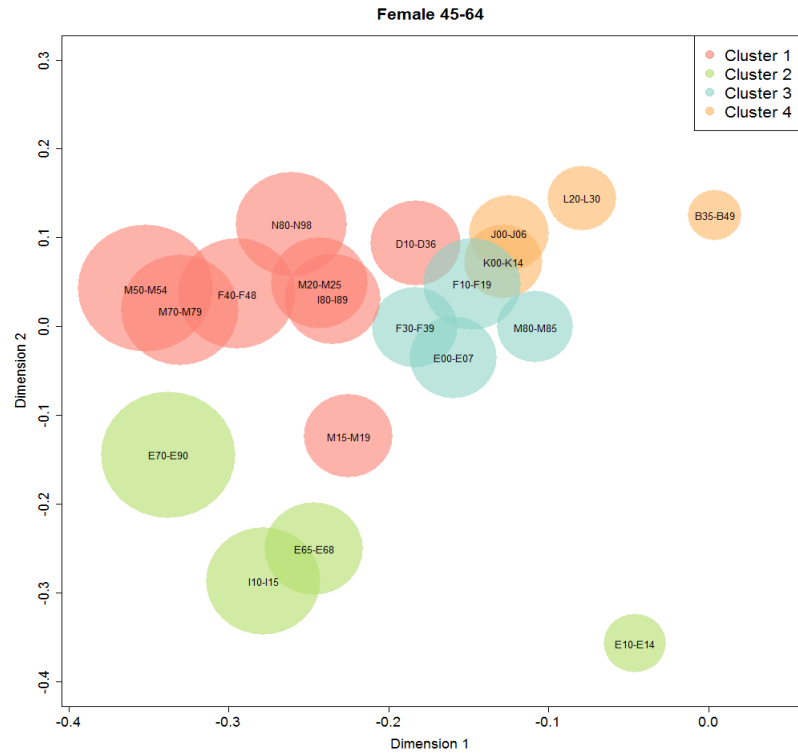

**Cluster 1**  
 M50-M54:Other dorsopathies  
 F40-F48:Neurotic, stress-related and somatoform disorder  
 M70-M79:Other soft tissue disorders  
 N80-N98:Noninflammatory disorders of female genital tract  
 M20-M25:Other joint disorders  
 I80-I89:Diseases of veins, lymphatic vessels and lymph nodes, not elsewhere classified  
 D10-D36:Benign neoplasms  
 M15-M19:Arthrosis

**Cluster 3**  
 F10-F19:Mental and behavioural disorders due to psychoactive substance use  
 E00-E07:Disorders of thyroid gland  
 F30-F39:Mood [affective] disorders  
 M80-M85:Disorders of bone density and structure

**Cluster 2**  
 E70-E90:Metabolic disorders  
 I10-I15:Hypertensive diseases  
 E65-E68:Obesity and other hyperalimantation  
 E10-E14:Diabetes mellitus

**Cluster 4**  
 J00-J06:Acute upper respiratory infections  
 K00-K14:Diseases of oral cavity, salivary glands and jaws  
 L20-L30:Dermatitis and eczema  
 B35-B49:Mycoses

**Figure 1 b.** Top four clusters in men (n= 191,171) aged 45-64 years, analyzed with multidimensional scaling

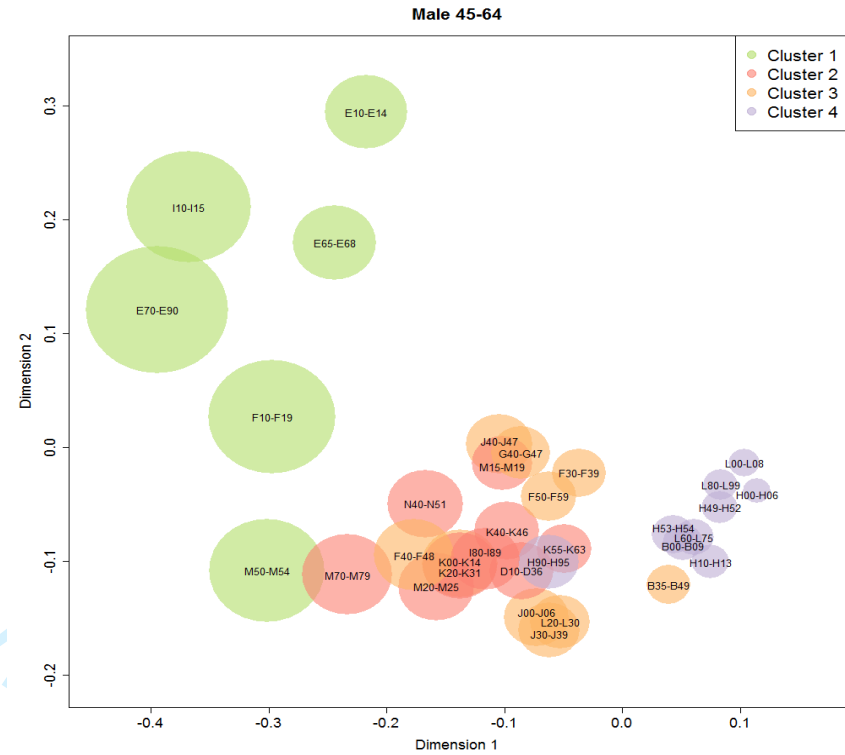

**Cluster 1**  
 E70-E90:Metabolic disorders  
 F10-F19:Mental and behavioural disorders due to psychoactive substance use

I10-I15:Hypertensive diseases

M50-M54:Other dorsopathies  
 E65-E68:Obesity and other hyperalimantation

E10-E14:Diabetes mellitus

**Cluster 3**  
 F40-F48:Neurotic, stress-related and somatoform disorders  
 K00-K14:Diseases of oral cavity, salivary glands and jaws  
 J40-J47:Chronic lower respiratory diseases  
 J00-J06:Acute upper respiratory infections  
 J30-J39:Other diseases of upper respiratory tract  
 L20-L30:Dermatitis and eczema  
 G40-G47:Episodic and paroxysmal disorders

F50-F59:Behavioural syndromes associated with physiological disturbances and physical factors  
 F30-F39:Mood [affective] disorders  
 B35-B49:Mycoses

**Cluster 2**  
 M70-M79:Other soft tissue disorders  
 N40-N51:Diseases of male genital organs  
 M20-M25:Other joint disorders

K20-K31:Diseases of oesophagus, stomach and duodenum  
 I80-I89:Diseases of veins, lymphatic vessels and lymph nodes, not elsewhere classified  
 K40-K46:Hernia  
 D10-D36:Benign neoplasms  
 M15-M19:Arthrosis  
 K55-K63:Other diseases of intestines

**Cluster 4**  
 H90-H95:Other disorders of ear  
 H53-H54:Visual disturbances and blindness  
 B00-B09:Viral infections characterized by skin and mucous membrane lesions  
 L60-L75:Disorders of skin appendages  
 H10-H13:Disorders of conjunctiva  
 H49-H52:Disorders of ocular muscles, binocular movement, accommodation and refraction

L80-L99:Other disorders of the skin and subcutaneous tissue

L00-L08:Infections of the skin and subcutaneous tissue  
 H00-H06:Disorders of eyelid, lacrimal system and orbit

Note: The cluster number are the same as expressed in table 2.

1  
2  
3  
4  
5  
6  
7  
8  
9  
10  
11  
12  
13  
14  
15  
16  
17  
18  
19  
20  
21  
22  
23  
24  
25  
26  
27  
28  
29  
30  
31  
32  
33  
34  
35  
36  
37  
38  
39  
40  
41  
42  
43  
44  
45  
46  
47  
48  
49  
50  
51  
52  
53  
54  
55  
56  
57  
58  
59  
60

### Appendix 1. Study Flow Chart.

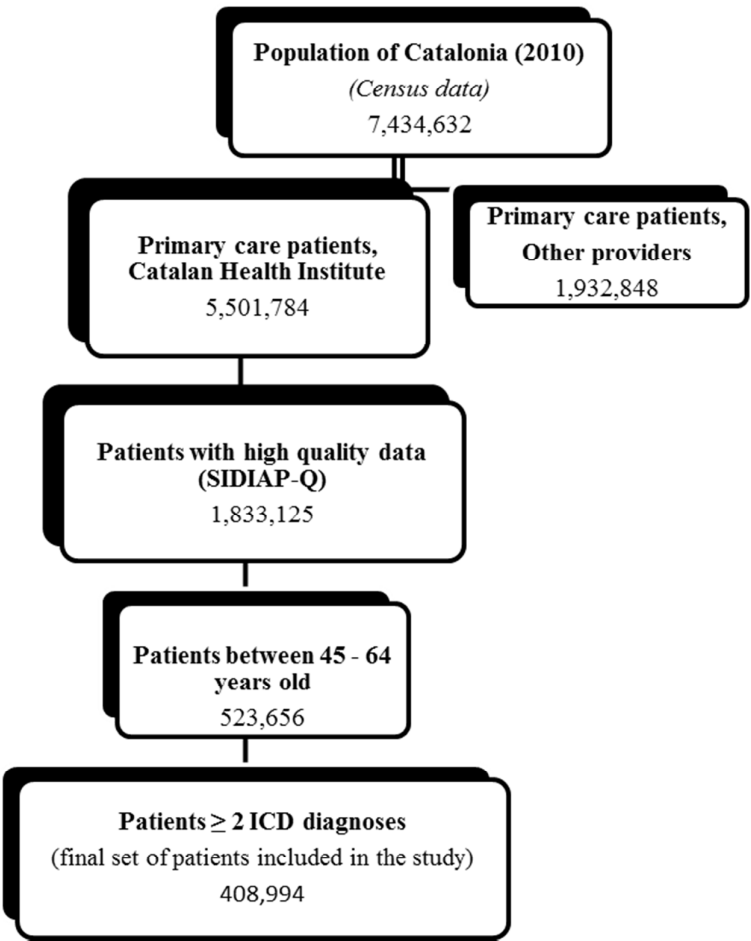

Appendix 2. Cluster dendrogram in women aged 45-64 years.

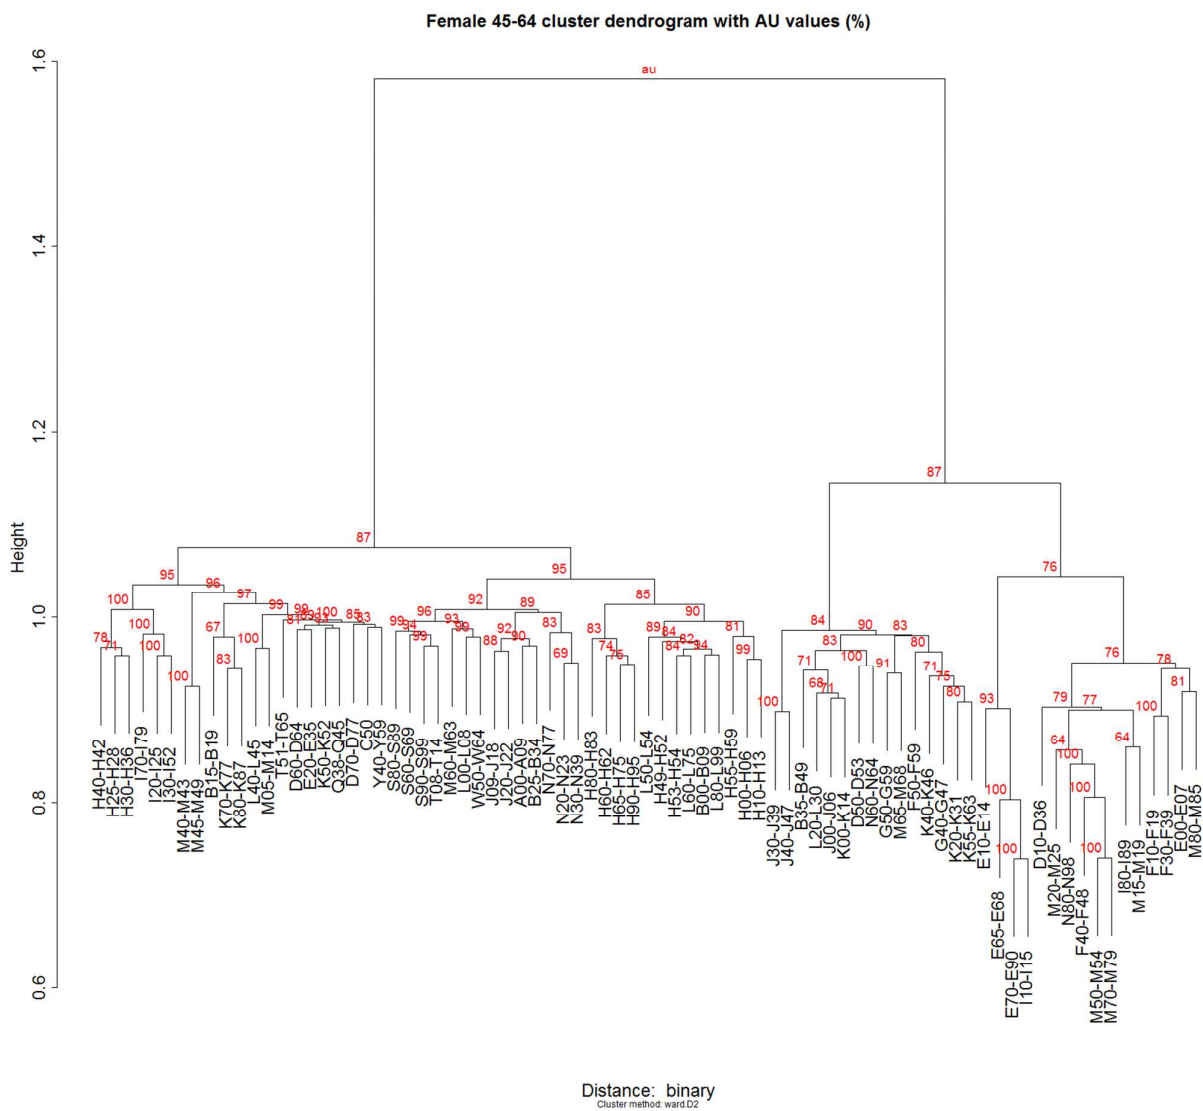

### Appendix 3. Cluster dendrogram in men aged 45-64 years, with approximately unbiased (AU) probability value.

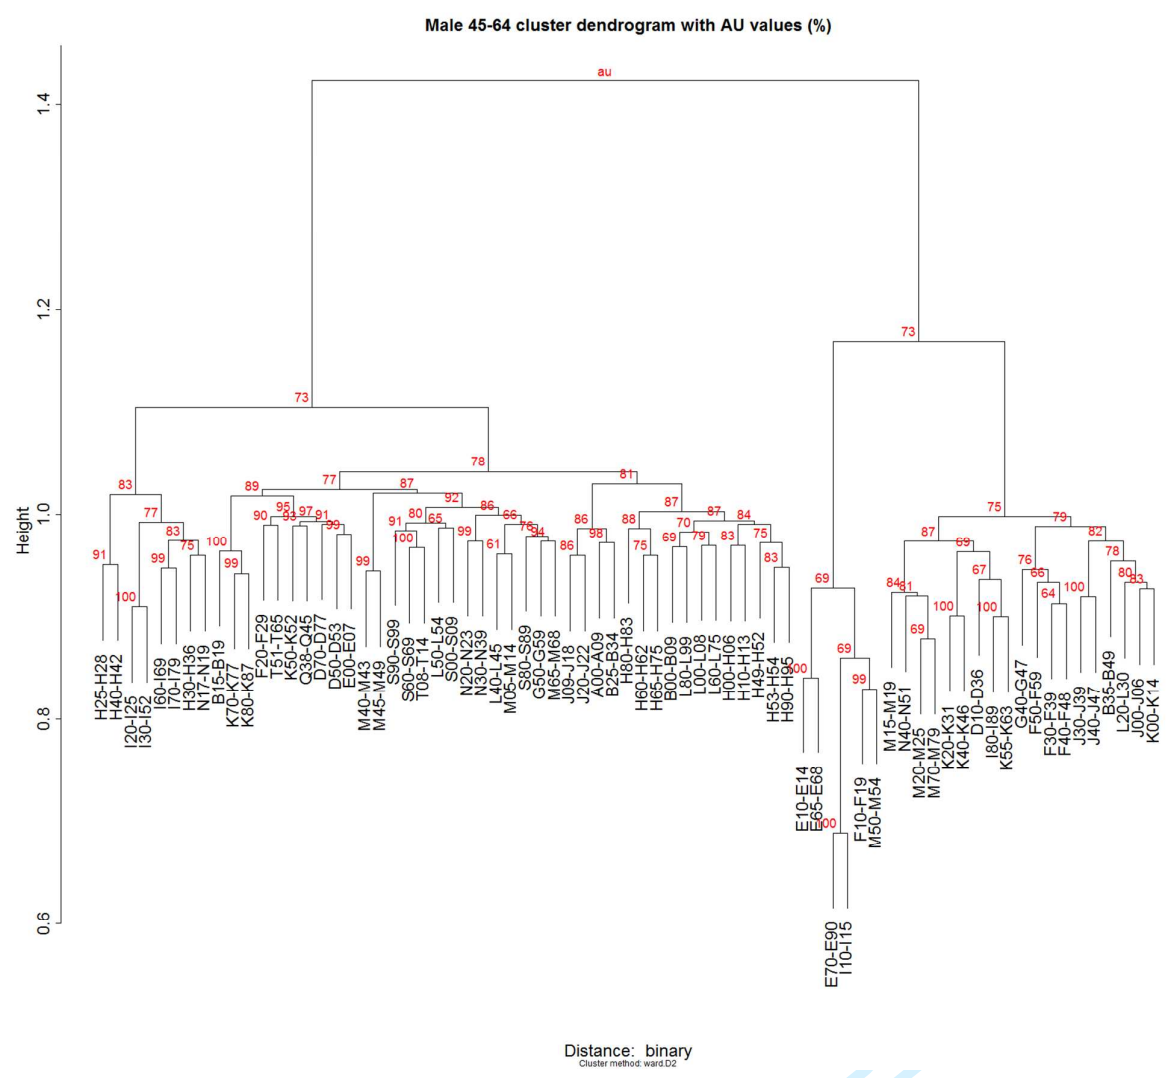



**Appendix 4.** Prevalence and composition of diagnostic clusters in women aged 45-64 years (n= 217,823).

| Cluster order number, n           | Prevalence 1 (%)* | Prevalence 2 (%)† | Blocks of diagnoses                                                                    | Prevalence in group‡, % | Prevalence in cluster, % | Most prevalent diagnoses of the block                         | AU p-value**     |
|-----------------------------------|-------------------|-------------------|----------------------------------------------------------------------------------------|-------------------------|--------------------------|---------------------------------------------------------------|------------------|
| <b>WC1<sup>^</sup></b><br>178,849 | 82.1              | 52.9              | M50-M54:Other dorsopathies                                                             | 35.8                    | 43.5                     | M54 Dorsalgia                                                 | 0.79 (0.74-0.85) |
|                                   |                   |                   | F40-F48:Neurotic, stress-related and somatoform disorders                              | 27.3                    | 33.2                     | F41 Other anxiety disorders                                   |                  |
|                                   |                   |                   | M70-M79:Other soft tissue disorders                                                    | 27.0                    | 32.8                     | M79 Other soft tissue disorders, not elsewhere classified     |                  |
|                                   |                   |                   | N80-N98:Noninflammatory disorders of female genital tract                              | 24.2                    | 29.5                     | N95 Menopausal and other perimenopausal disorders             |                  |
|                                   |                   |                   | M20-M25:Other joint disorders                                                          | 18.6                    | 22.6                     | M25 Other joint disorders, not elsewhere classified           |                  |
|                                   |                   |                   | I80-I89:Diseases of veins, lymphatic vessels and lymph nodes, not elsewhere classified | 18.3                    | 22.2                     | I83 Varicose veins of lower extremities                       |                  |
|                                   |                   |                   | D10-D36:Benign neoplasms                                                               | 16.2                    | 19.7                     | D25 Leiomyoma of uterus                                       |                  |
|                                   |                   |                   | M15-M19:Arthrosis                                                                      | 15.7                    | 19.1                     | M17 Gonarthrosis [arthrosis of knee]                          |                  |
| <b>WC2</b><br>121,564             | 55.8              | 23.0              | E70-E90:Metabolic disorders                                                            | 35.4                    | 63.4                     | E78 Disorders of lipoprotein metabolism and other lipidaemias | 0.93 (0.86-1.00) |
|                                   |                   |                   | I10-I15:Hypertensive diseases                                                          | 25.6                    | 45.8                     | I10 Essential (primary) hypertension                          |                  |
|                                   |                   |                   | E65-E68:Obesity and other hyperalimentation                                            | 19.0                    | 34.0                     | E66 Obesity                                                   |                  |
|                                   |                   |                   | E10-E14:Diabetes mellitus                                                              | 7.7                     | 13.7                     | E11 Non-insulin-                                              |                  |

|                       |      |      |                                                                            |      |      |                                                            |                  |
|-----------------------|------|------|----------------------------------------------------------------------------|------|------|------------------------------------------------------------|------------------|
|                       |      |      |                                                                            |      |      | dependent diabetes mellitus                                |                  |
| <b>WC3</b><br>103,147 | 47.4 | 10.8 | F10-F19:Mental and behavioural disorders due to psychoactive substance use | 18.6 | 39.4 | F17 Mental and behavioural disorders due to use of tobacco | 0.78 (0.73-0.84) |
|                       |      |      | E00-E07:Disorders of thyroid gland                                         | 14.9 | 31.4 | E03 Other hypothyroidism                                   |                  |
|                       |      |      | F30-F39:Mood [affective] disorders                                         | 14.6 | 30.8 | F32 Depressive episode                                     |                  |
|                       |      |      | M80-M85:Disorders of bone density and structure                            | 11.3 | 23.9 | M81 Osteoporosis without pathological fracture             |                  |
| <b>WC4</b><br>70,294  | 32.3 | 6.4  | J00-J06:Acute upper respiratory infections                                 | 12.6 | 39.1 | J00 Acute nasopharyngitis [common cold]                    | 0.71 (0.66-0.77) |
|                       |      |      | K00-K14:Diseases of oral cavity, salivary glands and jaws                  | 12.1 | 37.3 | K02 Dental caries                                          |                  |
|                       |      |      | L20-L30:Dermatitis and eczema                                              | 9.3  | 28.8 | L29 Pruritus                                               |                  |
|                       |      |      | B35-B49:Mycoses                                                            | 5.7  | 17.8 | B35 Dermatophytosis                                        |                  |
| <b>WC5</b><br>63,792  | 29.3 | 6.0  | K20-K31:Diseases of oesophagus, stomach and duodenum                       | 11.4 | 38.9 | K30 Dyspepsia                                              | 0.71 (0.66-0.76) |
|                       |      |      | G40-G47:Episodic and paroxysmal disorders                                  | 10.5 | 36.0 | G43 Migraine                                               |                  |
|                       |      |      | K55-K63:Other diseases of intestines                                       | 8.6  | 29.2 | K59 Other functional intestinal disorders                  |                  |
|                       |      |      | K40-K46:Hernia                                                             | 5.7  | 19.4 | K44 Diaphragmatic hernia                                   |                  |
| <b>WC6</b><br>34,707  | 15.9 | 1.6  | J30-J39:Other diseases of upper respiratory tract                          | 9.4  | 59.0 | J30 Vasomotor and allergic rhinitis                        | 1.00             |
|                       |      |      | J40-J47:Chronic lower respiratory diseases                                 | 8.2  | 51.2 | J45 Asthma                                                 |                  |
| <b>WC7</b><br>32,674  | 15.0 | 0.8  | D50-D53:Nutritional anaemias                                               | 8.3  | 55.2 | D50 Iron deficiency anaemia                                | 1.00             |
|                       |      |      | N60-N64:Disorders of breast                                                | 7.5  | 50.1 | N60 Benign mammary                                         |                  |

|                        |      |     |                                                                                               |     |       |                                                      |                  |
|------------------------|------|-----|-----------------------------------------------------------------------------------------------|-----|-------|------------------------------------------------------|------------------|
|                        |      |     |                                                                                               |     |       | dysplasia                                            |                  |
| <b>WC8</b><br>27,150   | 12.5 | 0.8 | G50-G59:Nerve, nerve root and plexus disorders                                                | 8.5 | 68.6  | G56 Mononeuropathies of upper limb                   | 0.91 (0.88-0.94) |
|                        |      |     | M65-M68:Disorders of synovium and tendon                                                      | 4.7 | 37.5  | M65 Synovitis and tenosynovitis                      |                  |
| <b>WC9</b><br>19,199   | 8.8  | 0.4 | N30-N39:Other diseases of urinary system                                                      | 5.9 | 66.7  | N39 Other disorders of urinary system                | 0.69 (0.62-0.75) |
|                        |      |     | N20-N23:Urolithiasis                                                                          | 3.4 | 38.3  | N20 Calculus of kidney and ureter                    |                  |
| <b>WC10</b><br>18,439  | 8.5  | 0.4 | H90-H95:Other disorders of ear                                                                | 6.3 | 75.0  | H91 Other hearing loss                               | 0.75 (0.70-0.80) |
|                        |      |     | H65-H75:Diseases of middle ear and mastoid                                                    | 2.5 | 30.1  | H65 Nonsuppurative otitis media                      |                  |
| <b>WC11</b><br>16,535  | 7.6  | 0.6 | M45-M49:Spondylopathies                                                                       | 4.3 | 57.1  | M47 Spondylosis                                      | 1.00             |
|                        |      |     | M40-M43:Deforming dorsopathies                                                                | 3.8 | 50.4  | M41 Scoliosis                                        |                  |
| <b>WC12</b><br>14, 335 | 6.6  | 0.4 | K80-K87:Disorders of gallbladder, biliary tract and pancreas                                  | 4.0 | 60.9  | K80 Cholelithiasis                                   | 0.83*            |
|                        |      |     | K70-K77:Diseases of liver                                                                     | 2.9 | 44.7  | K76 Other diseases of liver                          |                  |
| <b>WC13</b><br>12,320  | 5.7  | 0.0 | F50-F59:Behavioural syndromes associated with physiological disturbances and physical factors | 5.7 | 100.0 | F51 Nonorganic sleep disorders                       |                  |
| <b>WC14</b><br>10,357  | 4.8  | 0.0 | L60-L75:Disorders of skin appendages                                                          | 4.8 | 100.0 | L72 Follicular cysts of skin and subcutaneous tissue |                  |
| <b>WC15</b><br>9,555   | 4.4  | 0.0 | H53-H54:Visual disturbances and blindness                                                     | 4.4 | 100.0 | H54 Blindness and low vision                         |                  |
| <b>WC16</b><br>9,521   | 4.4  | 0.0 | I30-I52:Other forms of heart disease                                                          | 4.4 | 100.0 | I34 Nonrheumatic mitral valve disorders              |                  |
| <b>WC17</b><br>9,442   | 4.3  | 0.0 | B00-B09:Viral infections characterized by skin and mucous membrane lesions                    | 4.3 | 100.0 | B07 Viral warts                                      |                  |
| <b>WC18</b><br>8,541   | 3.9  | 0.0 | T08-T14:Injuries to unspecified part of trunk, limb or body region                            | 3.9 | 100.0 | T14 Injury of unspecified body region                |                  |

|                      |     |     |                                                                                       |     |       |                                                                    |  |
|----------------------|-----|-----|---------------------------------------------------------------------------------------|-----|-------|--------------------------------------------------------------------|--|
| <b>WC19</b><br>8,268 | 3.8 | 0.0 | H10-H13:Disorders of conjunctiva                                                      | 3.8 | 100.0 | H10 Conjunctivitis                                                 |  |
| <b>WC20</b><br>7,866 | 3.6 | 0.0 | H60-H62:Diseases of external ear                                                      | 3.6 | 100.0 | H61 Other disorders of external ear                                |  |
| <b>WC21</b><br>7,714 | 3.5 | 0.0 | H49-H52:Disorders of ocular muscles, binocular movement, accommodation and refraction | 3.5 | 100.0 | H52 Disorders of refraction and accommodation                      |  |
| <b>WC22</b><br>7,512 | 3.4 | 0.0 | L50-L54:Urticaria and erythema                                                        | 3.4 | 100.0 | L50 Urticaria                                                      |  |
| <b>WC23</b><br>7,298 | 3.4 | 0.0 | J20-J22:Other acute lower respiratory infections                                      | 3.4 | 100.0 | J20 Acute bronchitis                                               |  |
| <b>WC24</b><br>7,251 | 3.3 | 0.0 | L80-L99:Other disorders of the skin and subcutaneous tissue                           | 3.3 | 100.0 | L82 Seborrhoeic keratosis                                          |  |
| <b>WC25</b><br>6,178 | 2.8 | 0.0 | H00-H06:Disorders of eyelid, lacrimal system and orbit                                | 2.8 | 100.0 | H04 Disorders of lachrymal system                                  |  |
| <b>WC26</b><br>5,993 | 2.8 | 0.0 | H40-H42:Glaucoma                                                                      | 2.8 | 100.0 | H40 Glaucoma                                                       |  |
| <b>WC27</b><br>5,986 | 2.7 | 0.0 | A00-A09:Intestinal infectious diseases                                                | 2.7 | 100.0 | A09 Diarrhoea and gastro-enteritis of presumed infectious origin   |  |
| <b>WC28</b><br>5,890 | 2.7 | 0.0 | M05-M14:Inflammatory polyarthropathies                                                | 2.7 | 100.0 | M13 Other arthritis                                                |  |
| <b>WC29</b><br>5,548 | 2.5 | 0.0 | S80-S89:Injuries to the knee and lower leg                                            | 2.5 | 100.0 | S83 Dislocation, sprain and strain of joints and ligaments of knee |  |
| <b>WC30</b><br>5,416 | 2.5 | 0.0 | C50-C50:Malignant neoplasm of breast                                                  | 2.5 | 100.0 | C50 Malignant neoplasm of breast                                   |  |
| <b>WC31</b><br>5,372 | 2.5 | 0.0 | L40-L45:Papulosquamous disorders                                                      | 2.5 | 100.0 | L40 Psoriasis                                                      |  |
| <b>WC32</b><br>5,336 | 2.4 | 0.0 | H80-H83:Diseases of inner ear                                                         | 2.4 | 100.0 | H81 Disorders of vestibular function                               |  |
| <b>WC33</b>          | 2.0 | 0.0 | S90-S99:Injuries to the ankle and                                                     | 2.0 | 100.0 | S93 Dislocation, sprain                                            |  |

|               |     |     |                                                                                                 |     |       |                                                                              |  |
|---------------|-----|-----|-------------------------------------------------------------------------------------------------|-----|-------|------------------------------------------------------------------------------|--|
| 4,374         |     |     | foot                                                                                            |     |       | and strain of joints and ligaments at ankle and foot level                   |  |
| WC34<br>3,882 | 1.8 | 0.0 | B15-B19:Viral hepatitis                                                                         | 1.8 | 100.0 | B18 Chronic viral hepatitis                                                  |  |
| WC35<br>3,758 | 1.7 | 0.0 | H25-H28:Disorders of lens                                                                       | 1.7 | 100.0 | H25 Senile cataract                                                          |  |
| WC36<br>3,744 | 1.7 | 0.0 | K50-K52:Noninfective enteritis and colitis                                                      | 1.7 | 100.0 | K52 Other non-infective gastro-enteritis and colitis                         |  |
| WC37<br>3,689 | 1.7 | 0.0 | N70-N77:Inflammatory diseases of female pelvic organs                                           | 1.7 | 100.0 | N76 Other inflammation of vagina and vulva                                   |  |
| WC38<br>3,646 | 1.7 | 0.0 | J09-J18:Influenza and pneumonia                                                                 | 1.7 | 100.0 | J11 Influenza, virus not identified                                          |  |
| WC39<br>3,399 | 1.6 | 0.0 | L00-L08:Infections of the skin and subcutaneous tissue                                          | 1.6 | 100.0 | L03 Cellulitis                                                               |  |
| WC40<br>3,284 | 1.5 | 0.0 | Q38-Q45:Other congenital malformations of the digestive system                                  | 1.5 | 100.0 | Q40 Other congenital malformations of upper alimentary tract                 |  |
| WC41<br>3,180 | 1.5 | 0.0 | D60-D64:Aplastic and other anaemias                                                             | 1.5 | 100.0 | D64 Other anaemias                                                           |  |
| WC42<br>3,055 | 1.4 | 0.0 | W50-W64:Exposure to animate mechanical forces                                                   | 1.4 | 100.0 | W57 Bitten or stung by non-venomous insect and other non-venomous arthropods |  |
| WC43<br>2,926 | 1.3 | 0.0 | Y40-Y59:Drugs, medicaments and biological substances causing adverse effects in therapeutic use | 1.3 | 100.0 | Y52 Agents primarily affecting the cardiovascular system                     |  |
| WC44<br>2,884 | 1.3 | 0.0 | B25-B34:Other viral diseases                                                                    | 1.3 | 100.0 | B34 Viral infection of unspecified site                                      |  |
| WC45<br>2,788 | 1.3 | 0.0 | E20-E35:Disorders of other endocrine glands                                                     | 1.3 | 100.0 | E28 Ovarian dysfunction                                                      |  |
| WC46<br>2,765 | 1.3 | 0.0 | S60-S69:Injuries to the wrist and hand                                                          | 1.3 | 100.0 | S61 Open wound of wrist and hand                                             |  |

1  
2  
3  
4  
5  
6  
7  
8  
9  
10  
11  
12  
13  
14  
15  
16  
17  
18  
19  
20  
21  
22  
23  
24  
25  
26  
27  
28  
29  
30  
31  
32  
33  
34  
35  
36  
37  
38  
39  
40  
41  
42  
43  
44  
45  
46  
47

|                      |      |     |                                                                       |     |       |                                                      |  |
|----------------------|------|-----|-----------------------------------------------------------------------|-----|-------|------------------------------------------------------|--|
| <b>WC47</b><br>2,645 | 1.2  | 0.0 | H55-H59:Other disorders of eye and adnexa                             | 1.2 | 100.0 | H57 Other disorders of eye and adnexa                |  |
| <b>WC48</b><br>2,612 | 1.2  | 0.0 | M60-M63:Disorders of muscles                                          | 1.2 | 100.0 | M62 Other disorders of muscle                        |  |
| <b>WC49</b><br>2,600 | 1.2  | 0.0 | H30-H36:Disorders of choroid and retina                               | 1.2 | 100.0 | H35 Other retinal disorders                          |  |
| <b>WC50</b><br>2,584 | 1.2  | 0.0 | D70-D77:Other diseases of blood and blood-forming organs              | 1.2 | 100.0 | D72 Other disorders of white blood cells             |  |
| <b>WC51</b><br>2,508 | 1.2  | 0.0 | T51-T65:Toxic effects of substances chiefly nonmedicinal as to source | 1.2 | 100.0 | T65 Toxic effect of other and unspecified substances |  |
| <b>WC52</b><br>2,309 | 1.1  | 0.0 | I70-I79:Diseases of arteries, arterioles and capillaries              | 1.1 | 100.0 | I73 Other peripheral vascular diseases               |  |
| <b>WC53</b><br>2,241 | 1.03 | 0.0 | I20-I25:Ischaemic heart diseases                                      | 1.0 | 100.0 | I25 Chronic ischaemic heart disease                  |  |

\* Standard error to large

\*\*Approximately unbiased (AU) probability-value

^ Abbreviation of sex, method and number (WC1: Women Cluster 1)

Review only

**Appendix 5.** Prevalence and composition of diagnostic clusters in men aged 45-64 years (n= 191,171).

| Cluster order number, n           | Prevalence 1 .%* | Prevalence 2, %† | Blocks of diagnoses                                                                    | Prevalence in group‡, % | Prevalence in cluster, % | Most prevalent diagnoses of the block                         | AU p-value*      |
|-----------------------------------|------------------|------------------|----------------------------------------------------------------------------------------|-------------------------|--------------------------|---------------------------------------------------------------|------------------|
| <b>MC1<sup>^</sup></b><br>160,216 | 83.8             | 50.4             | E70-E90:Metabolic disorders                                                            | 42.2                    | 50.3                     | E78 Disorders of lipoprotein metabolism and other lipidaemias | 0.69 (0.64-0.75) |
|                                   |                  |                  | F10-F19:Mental and behavioural disorders due to psychoactive substance use             | 33.6                    | 40.1                     | F17 Mental and behavioural disorders due to use of tobacco    |                  |
|                                   |                  |                  | I10-I15:Hypertensive diseases                                                          | 32.5                    | 38.8                     | I10 Essential (primary) hypertension                          |                  |
|                                   |                  |                  | M50-M54:Other dorsopathies                                                             | 27.8                    | 33.2                     | M54 Dorsalgia                                                 |                  |
|                                   |                  |                  | E65-E68:Obesity and other hyperalimantation                                            | 14.6                    | 17.4                     | E66 Obesity                                                   |                  |
|                                   |                  |                  | E10-E14:Diabetes mellitus                                                              | 14.2                    | 16.9                     | E11 Non-insulin-dependent diabetes mellitus                   |                  |
| <b>MC2</b><br>110,200             | 57.6             | 24.2             | M70-M79:Other soft tissue disorders                                                    | 16.9                    | 29.3                     | M75 Shoulder lesions                                          | 0.87 (0.84-0.90) |
|                                   |                  |                  | N40-N51:Diseases of male genital organs                                                | 12.1                    | 21.0                     | N40 Hyperplasia of prostate                                   |                  |
|                                   |                  |                  | M20-M25:Other joint disorders                                                          | 12.0                    | 20.9                     | M25 Other joint disorders, not elsewhere classified           |                  |
|                                   |                  |                  | K20-K31:Diseases of oesophagus, stomach and duodenum                                   | 11.5                    | 20.0                     | K29 Gastritis and duodenitis                                  |                  |
|                                   |                  |                  | I80-I89:Diseases of veins, lymphatic vessels and lymph nodes, not elsewhere classified | 10.0                    | 17.4                     | I84 Haemorrhoids                                              |                  |
|                                   |                  |                  | K40-K46:Hernia                                                                         | 8.8                     | 15.2                     | K40 Inguinal hernia                                           |                  |

|                       |      |      |                                                                                               |      |      |                                                                     |                  |
|-----------------------|------|------|-----------------------------------------------------------------------------------------------|------|------|---------------------------------------------------------------------|------------------|
|                       |      |      | D10-D36:Benign neoplasms                                                                      | 8.6  | 14.9 | D17 Benign lipomatous neoplasm                                      |                  |
|                       |      |      | M15-M19:Arthrosis                                                                             | 7.7  | 13.4 | M17 Gonarthrosis [arthrosis of knee]                                |                  |
|                       |      |      | K55-K63:Other diseases of intestines                                                          | 6.4  | 11.1 | K62 Other diseases of anus and rectum                               |                  |
| <b>MC3</b><br>103,365 | 54.1 | 20.7 | F40-F48:Neurotic, stress-related and somatoform disorders                                     | 13.5 | 24.9 | F41 Nutritional marasmus                                            | 0.79 (0.74-0.84) |
|                       |      |      | K00-K14:Diseases of oral cavity, salivary glands and jaws                                     | 12.0 | 22.3 | K02 Dental caries                                                   |                  |
|                       |      |      | J40-J47:Chronic lower respiratory diseases                                                    | 9.3  | 17.2 | J44 Other chronic obstructive pulmonary disease                     |                  |
|                       |      |      | J00-J06:Acute upper respiratory infections                                                    | 8.9  | 16.4 | J00 Acute nasopharyngitis [common cold]                             |                  |
|                       |      |      | J30-J39:Other diseases of upper respiratory tract                                             | 8.0  | 14.8 | J30 Vasomotor and allergic rhinitis                                 |                  |
|                       |      |      | L20-L30:Dermatitis and eczema                                                                 | 7.5  | 13.9 | L21 Seborrhoeic dermatitis                                          |                  |
|                       |      |      | G40-G47:Episodic and paroxysmal disorders                                                     | 7.4  | 13.7 | G47 Sleep disorders                                                 |                  |
|                       |      |      | F50-F59:Behavioural syndromes associated with physiological disturbances and physical factors | 6.6  | 12.2 | F52 Sexual dysfunction, not caused by organic disorder or disease   |                  |
|                       |      |      | F30-F39:Mood [affective] disorders                                                            | 6.3  | 11.6 | F32 Depressive episode                                              |                  |
|                       |      |      | B35-B49:Mycoses                                                                               | 4.1  | 7.6  | B35 Dermatophytosis                                                 |                  |
| <b>MC4</b><br>48,140  | 25.2 | 4.7  | H90-H95:Other disorders of ear                                                                | 7.7  | 30.6 | H91 Disorders of sclera and cornea in diseases classified elsewhere | 0.87 (0.83-0.91) |
|                       |      |      | H53-H54:Visual disturbances and blindness                                                     | 3.9  | 15.5 | H54 Blindness and low vision                                        |                  |
|                       |      |      | B00-B09:Viral infections characterized by skin and                                            | 3.5  | 13.9 | B07 Viral warts                                                     |                  |



|                      |      |     |                                                                                       |     |      |                                                                    |                  |
|----------------------|------|-----|---------------------------------------------------------------------------------------|-----|------|--------------------------------------------------------------------|------------------|
|                      |      |     | mucous membrane lesions                                                               |     |      |                                                                    |                  |
|                      |      |     | L60-L75:Disorders of skin appendages                                                  | 3.5 | 13.9 | L72 Follicular cysts of skin and subcutaneous tissue               |                  |
|                      |      |     | H10-H13:Disorders of conjunctiva                                                      | 3.0 | 12.0 | H10 Conjunctivitis                                                 |                  |
|                      |      |     | H49-H52:Disorders of ocular muscles, binocular movement, accommodation and refraction | 2.8 | 11.2 | H52 Disorders of refraction and accommodation                      |                  |
|                      |      |     | L80-L99:Other disorders of the skin and subcutaneous tissue                           | 2.5 | 10.0 | L82 Seborrhoeic keratosis                                          |                  |
|                      |      |     | L00-L08:Infections of the skin and subcutaneous tissue                                | 2.1 | 8.3  | L02 Cutaneous abscess, furuncle and carbuncle                      |                  |
|                      |      |     | H00-H06:Disorders of eyelid, lacrimal system and orbit                                | 1.6 | 6.5  | H00 Hordeolum and chalazion                                        |                  |
| <b>MC5</b><br>30,315 | 15.9 | 2.9 | I30-I52:Other forms of heart disease                                                  | 6.9 | 43.7 | I45 Other conduction disorders                                     | 0.77 (0.73-0.82) |
|                      |      |     | I20-I25:Ischaemic heart diseases                                                      | 5.0 | 31.0 | I25 Chronic ischaemic heart disease                                |                  |
|                      |      |     | I70-I79:Diseases of arteries, arterioles and capillaries                              | 2.4 | 15.2 | I73 Other peripheral vascular diseases                             |                  |
|                      |      |     | I60-I69:Cerebrovascular diseases                                                      | 1.8 | 11.4 | I64 Stroke, not specified as haemorrhage or infarction             |                  |
|                      |      |     | H30-H36:Disorders of choroid and retina                                               | 1.7 | 11.0 | H36 Retinal disorders in diseases classified elsewhere             |                  |
|                      |      |     | N17-N19:Renal failure                                                                 | 1.5 | 9.2  | N18 Chronic renal failure                                          |                  |
| <b>MC6</b><br>29,907 | 15.6 | 1.5 | M05-M14:Inflammatory polyarthropathies                                                | 5.4 | 34.5 | M10 Gout                                                           | 0.66 (0.60-0.72) |
|                      |      |     | S80-S89:Injuries to the knee and lower leg                                            | 3.2 | 20.7 | S83 Dislocation, sprain and strain of joints and ligaments of knee |                  |

|                      |      |     |                                                                     |     |      |                                                                                    |                  |
|----------------------|------|-----|---------------------------------------------------------------------|-----|------|------------------------------------------------------------------------------------|------------------|
|                      |      |     | L40-L45: Papulosquamous disorders                                   | 3.2 | 20.5 | L40 Psoriasis                                                                      |                  |
|                      |      |     | G50-G59: Nerve, nerve root and plexus disorders                     | 2.7 | 17.4 | G56 Mononeuropathies of upper limb                                                 |                  |
|                      |      |     | M65-M68: Disorders of synovium and tendon                           | 2.6 | 16.8 | M65 Synovitis and tenosynovitis                                                    |                  |
| <b>MC7</b><br>19,313 | 10.1 | 0.9 | K70-K77: Diseases of liver                                          | 5.2 | 51.9 | K76 Other diseases of liver                                                        | 1.00             |
|                      |      |     | B15-B19: Viral hepatitis                                            | 3.2 | 32.0 | B18 Chronic viral hepatitis                                                        |                  |
|                      |      |     | K80-K87: Disorders of gallbladder, biliary tract and pancreas       | 2.6 | 25.8 | K80 Cholelithiasis                                                                 |                  |
| <b>MC8</b><br>19,160 | 10.0 | 0.7 | T08-T14: Injuries to unspecified part of trunk, limb or body region | 4.1 | 41.0 | T14 Injury of unspecified body region                                              | 0.80 (0.75-0.86) |
|                      |      |     | L50-L54: Urticaria and erythema                                     | 2.1 | 20.8 | L50 Urticaria                                                                      |                  |
|                      |      |     | S60-S69: Injuries to the wrist and hand                             | 1.9 | 18.5 | S61 Open wound of wrist and hand                                                   |                  |
|                      |      |     | S90-S99: Injuries to the ankle and foot                             | 1.4 | 13.9 | S93 Dislocation, sprain and strain of joints and ligaments at ankle and foot level |                  |
|                      |      |     | S00-S09: Injuries to the head                                       | 1.3 | 13.3 | S01 Open wound of head                                                             |                  |
| <b>MC9</b><br>13,752 | 7.2  | 0.3 | E00-E07: Disorders of thyroid gland                                 | 2.4 | 32.8 | E03 Other hypothyroidism                                                           | 0.97 (0.96-0.98) |
|                      |      |     | K50-K52: Noninfective enteritis and colitis                         | 1.7 | 24.1 | K52 Other non-infective gastro-enteritis and colitis                               |                  |
|                      |      |     | D50-D53: Nutritional anaemias                                       | 1.2 | 16.3 | D50 Iron deficiency anaemia                                                        |                  |
|                      |      |     | Q38-Q45: Other congenital malformations of the digestive system     | 1.2 | 16.2 | Q40 Other congenital malformations of upper alimentary tract                       |                  |
|                      |      |     | D70-D77: Other diseases of blood and blood-forming organs           | 1.1 | 15.3 | D72 Other disorders of white blood cells                                           |                  |
| <b>MC10</b>          | 7.1  | 0.5 | J20-J22: Other acute lower                                          | 2.6 | 37.2 | J20 Acute bronchitis                                                               | 0.86 (0.82-0.91) |

|                       |     |     |                                                                        |     |      |                                                                 |                  |
|-----------------------|-----|-----|------------------------------------------------------------------------|-----|------|-----------------------------------------------------------------|------------------|
| 13,490                |     |     | respiratory infections                                                 |     |      |                                                                 |                  |
|                       |     |     | A00-A09: Intestinal infectious diseases                                | 2.4 | 34.2 | A09 Diarrhoea and gastroenteritis of presumed infectious origin |                  |
|                       |     |     | J09-J18: Influenza and pneumonia                                       | 1.6 | 22.0 | J11 Influenza, virus not identified                             |                  |
|                       |     |     | B25-B34: Other viral diseases                                          | 1.0 | 14.6 | B34 Viral infection of unspecified site                         |                  |
| <b>MC11</b><br>13,434 | 7.0 | 0.4 | H60-H62: Diseases of external ear                                      | 3.9 | 55.3 | H61 Other disorders of external ear                             | 0.88 (0.85-0.92) |
|                       |     |     | H65-H75: Diseases of middle ear and mastoid                            | 2.1 | 30.5 | H65 Nonsuppurative otitis media                                 |                  |
|                       |     |     | H80-H83: Diseases of inner ear                                         | 1.4 | 19.9 | H81 Disorders of vestibular function                            |                  |
| <b>MC12</b><br>10,952 | 5.7 | 0.1 | N20-N23: Urolithiasis                                                  | 4.3 | 75.5 | N20 Calculus of kidney and ureter                               | 0.99 (0.98-1.00) |
|                       |     |     | N30-N39: Other diseases of urinary system                              | 1.6 | 27.1 | N39 Other disorders of urinary system                           |                  |
| <b>MC13</b><br>8,794  | 4.6 | 0.3 | M45-M49: Spondylopathies                                               | 3.1 | 66.7 | M47 Spondylosis                                                 | 0.99 (0.95-1.00) |
|                       |     |     | M40-M43: Deforming dorsopathies                                        | 1.8 | 38.9 | M41 Scoliosis                                                   |                  |
| <b>MC14</b><br>7,444  | 3.9 | 0.2 | H40-H42: Glaucoma                                                      | 2.3 | 59.6 | H40 Glaucoma                                                    | 0.91 (0.88-0.95) |
|                       |     |     | H25-H28: Disorders of lens                                             | 1.8 | 45.4 | H25 Senile cataract                                             |                  |
| <b>MC15</b><br>6,161  | 3.2 | 0.0 | T51-T65: Toxic effects of substances chiefly nonmedicinal as to source | 2.1 | 65.8 | T65 Toxic effect of other and unspecified substances            | 0.90 (0.87-0.93) |
|                       |     |     | F20-F29: Schizophrenia, schizotypal and delusional disorders           | 1.1 | 35.3 | F20 Schizophrenia                                               |                  |

\*\*Approximately unbiased (AU) probability-value

**Appendix 6.** Factors in women aged 45-64 years (n= 217,823).

| Factorial order number, n         | Prevalence 1, %* | Prevalence 2, %† | Blocks of diagnoses                                      | Prevalence in group, % | Prevalence in factor, % | Variance proportion, % | Cumulative Variance proportion, % |
|-----------------------------------|------------------|------------------|----------------------------------------------------------|------------------------|-------------------------|------------------------|-----------------------------------|
| <b>WF1<sup>^</sup></b><br>130,072 | 59.7             | 25.4             | M50-M54:Other dorsopathies                               | 35.8                   | 59.9                    | 10.6                   | 69.1                              |
|                                   |                  |                  | M70-M79:Other soft tissue disorders                      | 27.0                   | 45.2                    |                        |                                   |
|                                   |                  |                  | M15-M19:Arthrosis                                        | 15.7                   | 26.2                    |                        |                                   |
|                                   |                  |                  | G50-G59:Nerve, nerve root and plexus disorders           | 8.5                    | 14.3                    |                        |                                   |
|                                   |                  |                  | M45-M49:Spondylopathies                                  | 4.3                    | 7.3                     |                        |                                   |
|                                   |                  |                  | M40-M43:Deforming dorsopathies                           | 3.8                    | 6.4                     |                        |                                   |
| <b>WF2</b><br>82,301              | 37.8             | 12.0             | I10-I15:Hypertensive diseases                            | 25.6                   | 67.6                    | 7.0                    | 84.5                              |
|                                   |                  |                  | E65-E68:Obesity and other hyperalimentation              | 19.0                   | 50.2                    |                        |                                   |
|                                   |                  |                  | E10-E14:Diabetes mellitus                                | 7.7                    | 20.3                    |                        |                                   |
| <b>WF3</b><br>71,436              | 32.8             | 8.1              | I10-I15:Hypertensive diseases                            | 25.6                   | 78.0                    | 20.2                   | 58.6                              |
|                                   |                  |                  | E10-E14:Diabetes mellitus                                | 7.7                    | 23.4                    |                        |                                   |
|                                   |                  |                  | I30-I52:Other forms of heart disease                     | 4.4                    | 13.3                    |                        |                                   |
|                                   |                  |                  | H25-H28:Disorders of lens                                | 1.7                    | 5.3                     |                        |                                   |
|                                   |                  |                  | H30-H36:Disorders of choroid and retina                  | 1.2                    | 3.6                     |                        |                                   |
|                                   |                  |                  | I70-I79:Diseases of arteries, arterioles and capillaries | 1.1                    | 3.2                     |                        |                                   |
|                                   |                  |                  | I20-I25:Ischaemic heart diseases                         | 1.0                    | 3.1                     |                        |                                   |
| <b>WF4</b><br>60,027              | 27.6             | 5.9              | J00-J06:Acute upper respiratory infections               | 12.6                   | 45.8                    | 38.3                   | 38.3                              |
|                                   |                  |                  | N30-N39:Other diseases of urinary system                 | 5.9                    | 21.3                    |                        |                                   |
|                                   |                  |                  | H60-H62:Diseases of external ear                         | 3.6                    | 13.1                    |                        |                                   |
|                                   |                  |                  | J20-J22:Other acute lower respiratory infections         | 3.4                    | 12.2                    |                        |                                   |
|                                   |                  |                  | A00-A09:Intestinal infectious diseases                   | 2.7                    | 10.0                    |                        |                                   |
|                                   |                  |                  | H65-H75:Diseases of middle ear and mastoid               | 2.5                    | 9.2                     |                        |                                   |

|                      |      |     |                                                                            |      |       |     |       |
|----------------------|------|-----|----------------------------------------------------------------------------|------|-------|-----|-------|
|                      |      |     | J09-J18:Influenza and pneumonia                                            | 1.7  | 6.1   |     |       |
|                      |      |     | B25-B34:Other viral diseases                                               | 1.3  | 4.8   |     |       |
|                      |      |     | M60-M63:Disorders of muscles                                               | 1.2  | 4.4   |     |       |
| <b>WF5</b><br>56,671 | 26.0 | 5.3 | L20-L30:Dermatitis and eczema                                              | 9.3  | 35.7  | 8.4 | 77.5  |
|                      |      |     | B35-B49:Mycoses                                                            | 5.7  | 22.1  |     |       |
|                      |      |     | L60-L75:Disorders of skin appendages                                       | 4.8  | 18.3  |     |       |
|                      |      |     | H53-H54:Visual disturbances and blindness                                  | 4.4  | 16.9  |     |       |
|                      |      |     | H10-H13:Disorders of conjunctiva                                           | 3.8  | 14.6  |     |       |
|                      |      |     | L80-L99:Other disorders of the skin and subcutaneous tissue                | 3.3  | 12.8  |     |       |
|                      |      |     | H55-H59:Other disorders of eye and adnexa                                  | 1.2  | 4.7   |     |       |
| <b>WF6</b><br>46,391 | 21.3 | 3.8 | K20-K31:Diseases of oesophagus, stomach and duodenum                       | 11.4 | 53.6  | 5.9 | 90.4  |
|                      |      |     | K40-K46:Hernia                                                             | 5.7  | 26.7  |     |       |
|                      |      |     | K80-K87:Disorders of gallbladder, biliary tract and pancreas               | 4.0  | 18.8  |     |       |
|                      |      |     | K70-K77:Diseases of liver                                                  | 2.9  | 13.8  |     |       |
|                      |      |     | Q38-Q45:Other congenital malformations of the digestive system             | 1.5  | 7.1   |     |       |
| <b>WF7</b><br>41,492 | 19.0 | 0.6 | M80-M85:Disorders of bone density and structure                            | 11.3 | 59.5  | 5.1 | 95.5  |
|                      |      |     | D50-D53:Nutritional anaemias                                               | 8.3  | 43.5  |     |       |
| <b>WF8</b><br>40,619 | 18.6 | 0.0 | F10-F19:Mental and behavioural disorders due to psychoactive substance use | 18.6 | 100.0 | 4.3 | 99.8  |
| <b>WF9</b><br>23,729 | 10.9 | 0.6 | J40-J47:Chronic lower respiratory diseases                                 | 8.2  | 74.9  | 4.1 | 103.9 |
|                      |      |     | J20-J22:Other acute lower respiratory infections                           | 3.4  | 30.8  |     |       |

\*Individuals from  $\geq 1$  diagnosis in the factor/ † Individuals from with  $\geq 2$  diagnosis in the factor

^ Abbreviation of sex, method and number (WF1: Women Factor 1)

## Appendix 7. Factors in men aged 45-64 years (n= 191,171).

| Factorial order number, n         | Prevalence 1, %* | Prevalence 2, %† | Blocks of diagnoses                                                        | Prevalence in age, % | Prevalence in factor, % | Variance proportion, % | Cumulative Variance proportion, % |
|-----------------------------------|------------------|------------------|----------------------------------------------------------------------------|----------------------|-------------------------|------------------------|-----------------------------------|
| <b>MF1<sup>^</sup></b><br>118,037 | 61.7             | 26.1             | E70-E90:Metabolic disorders                                                | 42.2                 | 68.3                    | 5.1                    | 94.8                              |
|                                   |                  |                  | I10-I15:Hypertensive diseases                                              | 32.6                 | 52.7                    |                        |                                   |
|                                   |                  |                  | E65-E68:Obesity and other hyperalimentation                                | 14.6                 | 23.6                    |                        |                                   |
|                                   |                  |                  | M05-M14:Inflammatory polyarthropathies                                     | 5.4                  | 8.7                     |                        |                                   |
| <b>MF2</b><br>75,315              | 39.4             | 8.7              | I10-I15:Hypertensive diseases                                              | 32.5                 | 82.6                    | 28.5                   | 28.5                              |
|                                   |                  |                  | I30-I52:Other forms of heart disease                                       | 6.9                  | 17.6                    |                        |                                   |
|                                   |                  |                  | I20-I25:Ischaemic heart diseases                                           | 5.0                  | 12.6                    |                        |                                   |
|                                   |                  |                  | I70-I79:Diseases of arteries, arterioles and capillaries                   | 2.4                  | 6.1                     |                        |                                   |
|                                   |                  |                  | I60-I69:Cerebrovascular diseases                                           | 1.8                  | 4.6                     |                        |                                   |
|                                   |                  |                  | N17-N19:Renal failure                                                      | 1.5                  | 3.7                     |                        |                                   |
| <b>MF3</b><br>73,638              | 38.5             | 4.4              | F10-F19:Mental and behavioural disorders due to psychoactive substance use | 33.6                 | 87.2                    | 5.3                    | 89.6                              |
|                                   |                  |                  | K70-K77:Diseases of liver                                                  | 5.2                  | 13.6                    |                        |                                   |
|                                   |                  |                  | B15-B19:Viral hepatitis                                                    | 3.2                  | 8.4                     |                        |                                   |
|                                   |                  |                  | F20-F29:Schizophrenia, schizotypal and delusional disorders                | 1.1                  | 2.9                     |                        |                                   |
| <b>MF4</b><br>66,303              | 34.7             | 5.1              | M50-M54:Other dorsopathies                                                 | 27.8                 | 80.2                    | 7.3                    | 77.8                              |
|                                   |                  |                  | M15-M19:Arthrosis                                                          | 7.7                  | 22.2                    |                        |                                   |
|                                   |                  |                  | M45-M49:Spondylopathies                                                    | 3.1                  | 8.8                     |                        |                                   |
|                                   |                  |                  | M40-M43:Deforming dorsopathies                                             | 1.8                  | 5.2                     |                        |                                   |
| <b>MF5</b><br>34,903              | 18.3             | 2.5              | L20-L30:Dermatitis and eczema                                              | 7.5                  | 41.3                    | 22.2                   | 50.7                              |
|                                   |                  |                  | B35-B49:Mycoses                                                            | 4.1                  | 22.5                    |                        |                                   |
|                                   |                  |                  | H53-H54:Visual disturbances and                                            | 3.9                  | 21.3                    |                        |                                   |

|                      |      |     |                                                                    |      |       |      |       |
|----------------------|------|-----|--------------------------------------------------------------------|------|-------|------|-------|
|                      |      |     | blindness                                                          |      |       |      |       |
|                      |      |     | H10-H13:Disorders of conjunctiva                                   | 3.0  | 16.6  |      |       |
|                      |      |     | L80-L99:Other disorders of the skin and subcutaneous tissue        | 2.5  | 13.8  |      |       |
| <b>MF6</b><br>27,697 | 14.5 | 1.8 | J00-J06:Acute upper respiratory infections                         | 8.9  | 61.3  | 10.4 | 61.0  |
|                      |      |     | J20-J22:Other acute lower respiratory infections                   | 2.6  | 18.1  |      |       |
|                      |      |     | A00-A09:Intestinal infectious diseases                             | 2.4  | 16.7  |      |       |
|                      |      |     | J09-J18:Influenza and pneumonia                                    | 1.6  | 10.7  |      |       |
|                      |      |     | B25-B34:Other viral diseases                                       | 1.0  | 7.1   |      |       |
| <b>MF7</b><br>33,568 | 17.6 | 2.2 | E10-E14:Diabetes mellitus                                          | 14.2 | 80.8  | 9.5  | 70.5  |
|                      |      |     | H40-H42:Glaucoma                                                   | 2.3  | 13.2  |      |       |
|                      |      |     | H25-H28:Disorders of lens                                          | 1.8  | 10.1  |      |       |
|                      |      |     | H30-H36:Disorders of choroid and retina                            | 1.7  | 10.0  |      |       |
| <b>MF8</b><br>25,121 | 13.1 | 0.7 | K20-K31:Diseases of oesophagus, stomach and duodenum               | 11.5 | 87.8  | 6.5  | 84.3  |
|                      |      |     | D50-D53:Nutritional anaemias                                       | 1.2  | 8.9   |      |       |
|                      |      |     | Q38-Q45:Other congenital malformations of the digestive system     | 1.2  | 8.9   |      |       |
| <b>MF9</b><br>15,974 | 8.4  | 0.4 | T08-T14:Injuries to unspecified part of trunk, limb or body region | 4.1  | 49.2  | 5.0  | 99.8  |
|                      |      |     | S80-S89:Injuries to the knee and lower leg                         | 3.3  | 38.7  |      |       |
|                      |      |     | S90-S99:Injuries to the ankle and foot                             | 1.4  | 16.7  |      |       |
| <b>MF10</b><br>8,271 | 4.3  | 0.0 | N20-N23:Urolithiasis                                               | 4.3  | 100.0 | 3.9  | 103.7 |

\*Individuals from  $\geq 1$  diagnosis in the factor/ † Individuals from with  $\geq 2$  diagnosis in the factor

^ Abbreviation of sex, method and number (MF1: Men Factor 1)

**STROBE 2007 (v4) Statement—Checklist of items that should be included in reports of *cross-sectional studies***

| Section/Topic                | Item # | Recommendation                                                                                                                                                                       | Reported on page # |
|------------------------------|--------|--------------------------------------------------------------------------------------------------------------------------------------------------------------------------------------|--------------------|
| <b>Title and abstract</b>    | 1      | (a) Indicate the study’s design with a commonly used term in the title or the abstract                                                                                               | 1                  |
|                              |        | (b) Provide in the abstract an informative and balanced summary of what was done and what was found                                                                                  | 2                  |
| <b>Introduction</b>          |        |                                                                                                                                                                                      |                    |
| Background/rationale         | 2      | Explain the scientific background and rationale for the investigation being reported                                                                                                 | 4                  |
| Objectives                   | 3      | State specific objectives, including any prespecified hypotheses                                                                                                                     | 5                  |
| <b>Methods</b>               |        |                                                                                                                                                                                      |                    |
| Study design                 | 4      | Present key elements of study design early in the paper                                                                                                                              | 5                  |
| Setting                      | 5      | Describe the setting, locations, and relevant dates, including periods of recruitment, exposure, follow-up, and data collection                                                      | 5                  |
| Participants                 | 6      | (a) Give the eligibility criteria, and the sources and methods of selection of participants                                                                                          | 5                  |
| Variables                    | 7      | Clearly define all outcomes, exposures, predictors, potential confounders, and effect modifiers. Give diagnostic criteria, if applicable                                             | 6                  |
| Data sources/<br>measurement | 8*     | For each variable of interest, give sources of data and details of methods of assessment (measurement). Describe comparability of assessment methods if there is more than one group | 6-8                |
| Bias                         | 9      | Describe any efforts to address potential sources of bias                                                                                                                            | -                  |
| Study size                   | 10     | Explain how the study size was arrived at                                                                                                                                            | 5                  |
| Quantitative variables       | 11     | Explain how quantitative variables were handled in the analyses. If applicable, describe which groupings were chosen and why                                                         |                    |
| Statistical methods          | 12     | (a) Describe all statistical methods, including those used to control for confounding                                                                                                | 6                  |
|                              |        | (b) Describe any methods used to examine subgroups and interactions                                                                                                                  | 6                  |
|                              |        | (c) Explain how missing data were addressed                                                                                                                                          | 6-9                |
|                              |        | (d) If applicable, describe analytical methods taking account of sampling strategy                                                                                                   | 6-9                |
|                              |        | (e) Describe any sensitivity analyses                                                                                                                                                | 6-9                |
| <b>Results</b>               |        |                                                                                                                                                                                      |                    |



|                          |     |                                                                                                                                                                                                              |                               |
|--------------------------|-----|--------------------------------------------------------------------------------------------------------------------------------------------------------------------------------------------------------------|-------------------------------|
| Participants             | 13* | (a) Report numbers of individuals at each stage of study—eg numbers potentially eligible, examined for eligibility, confirmed eligible, included in the study, completing follow-up, and analysed            | 10                            |
|                          |     | (b) Give reasons for non-participation at each stage                                                                                                                                                         | 10                            |
|                          |     | (c) Consider use of a flow diagram                                                                                                                                                                           | Supplementary File Appendix 1 |
| Descriptive data         | 14* | (a) Give characteristics of study participants (eg demographic, clinical, social) and information on exposures and potential confounders                                                                     | Table 1                       |
|                          |     | (b) Indicate number of participants with missing data for each variable of interest                                                                                                                          | Tables                        |
| Outcome data             | 15* | Report numbers of outcome events or summary measures                                                                                                                                                         | Tables                        |
| Main results             | 16  | (a) Give unadjusted estimates and, if applicable, confounder-adjusted estimates and their precision (eg, 95% confidence interval). Make clear which confounders were adjusted for and why they were included | Tables 2 and 3.               |
|                          |     | (b) Report category boundaries when continuous variables were categorized                                                                                                                                    | -                             |
|                          |     | (c) If relevant, consider translating estimates of relative risk into absolute risk for a meaningful time period                                                                                             | -                             |
| Other analyses           | 17  | Report other analyses done—eg analyses of subgroups and interactions, and sensitivity analyses                                                                                                               | -                             |
| <b>Discussion</b>        |     |                                                                                                                                                                                                              |                               |
| Key results              | 18  | Summarise key results with reference to study objectives                                                                                                                                                     | 23                            |
| Limitations              | 19  | Discuss limitations of the study, taking into account sources of potential bias or imprecision. Discuss both direction and magnitude of any potential bias                                                   | 20-21                         |
| Interpretation           | 20  | Give a cautious overall interpretation of results considering objectives, limitations, multiplicity of analyses, results from similar studies, and other relevant evidence                                   | 19                            |
| Generalisability         | 21  | Discuss the generalisability (external validity) of the study results                                                                                                                                        | 20                            |
| <b>Other information</b> |     |                                                                                                                                                                                                              |                               |
| Funding                  | 22  | Give the source of funding and the role of the funders for the present study and, if applicable, for the original study on which the present article is based                                                | 23                            |

\*Give information separately for cases and controls in case-control studies and, if applicable, for exposed and unexposed groups in cohort and cross-sectional studies.

**Note:** An Explanation and Elaboration article discusses each checklist item and gives methodological background and published examples of transparent reporting. The STROBE checklist is best used in conjunction with this article (freely available on the Web sites of PLoS Medicine at <http://www.plosmedicine.org/>, Annals of Internal Medicine at <http://www.annals.org/>, and Epidemiology at <http://www.epidem.com/>). Information on the STROBE Initiative is available at [www.strobe-statement.org](http://www.strobe-statement.org).

# BMJ Open

## Comparative analysis of methods for identifying multimorbidity patterns: A study of 'real world' data.

|                                 |                                                                                                                                                                                                                                                                                                                                                                                                                                                                                                                                                                                                                                                                                                                                                                                                                                                                                                                                                                                                                                                                |
|---------------------------------|----------------------------------------------------------------------------------------------------------------------------------------------------------------------------------------------------------------------------------------------------------------------------------------------------------------------------------------------------------------------------------------------------------------------------------------------------------------------------------------------------------------------------------------------------------------------------------------------------------------------------------------------------------------------------------------------------------------------------------------------------------------------------------------------------------------------------------------------------------------------------------------------------------------------------------------------------------------------------------------------------------------------------------------------------------------|
| Journal:                        | <i>BMJ Open</i>                                                                                                                                                                                                                                                                                                                                                                                                                                                                                                                                                                                                                                                                                                                                                                                                                                                                                                                                                                                                                                                |
| Manuscript ID                   | bmjopen-2017-018986.R1                                                                                                                                                                                                                                                                                                                                                                                                                                                                                                                                                                                                                                                                                                                                                                                                                                                                                                                                                                                                                                         |
| Article Type:                   | Research                                                                                                                                                                                                                                                                                                                                                                                                                                                                                                                                                                                                                                                                                                                                                                                                                                                                                                                                                                                                                                                       |
| Date Submitted by the Author:   | 30-Nov-2017                                                                                                                                                                                                                                                                                                                                                                                                                                                                                                                                                                                                                                                                                                                                                                                                                                                                                                                                                                                                                                                    |
| Complete List of Authors:       | Roso-Llorach, Albert; Institut Universitari d'Investigació en Atenció Primària Jordi Gol (IDIAP Jordi Gol), ; Universitat Autònoma de Barcelona, Violan-Fors, Concepción; Institut Universitari d'Investigació en Atenció Primària Jordi Gol (IDIAP Jordi Gol); Universitat Autònoma de Barcelona Foguet-Boreu, Quintí; Institut Universitari d'Investigació en Atenció Primària Jordi Gol (IDIAP Jordi Gol) Universitat Autònoma de Barcelona; Universitat Autònoma de Barcelona Rodriguez-Blanco, Teresa; Institut Universitari d'Investigació en Atenció Primària Jordi Gol (IDIAP Jordi Gol); Universitat Autònoma de Barcelona Pons-Vigués, Mariona; Institut Universitari d'Investigació en Atenció Primària Jordi Gol (IDIAP Jordi Gol); Universitat Autònoma de Barcelona Pujol-Ribera, Enriqueta; Institut Universitari d'Investigació en Atenció Primària (IDIAP-Jordi Gol); Universitat Autònoma de Barcelona Valderas, Jose; University of Exeter Medical School, Health Services & Policy Research Group, Academic Collaboration for Primary Care |
| <b>Primary Subject Heading</b>: | Epidemiology                                                                                                                                                                                                                                                                                                                                                                                                                                                                                                                                                                                                                                                                                                                                                                                                                                                                                                                                                                                                                                                   |
| Secondary Subject Heading:      | Research methods, General practice / Family practice, Anaesthesia                                                                                                                                                                                                                                                                                                                                                                                                                                                                                                                                                                                                                                                                                                                                                                                                                                                                                                                                                                                              |
| Keywords:                       | Multimorbidity, Cluster analysis, Factor analysis, Primary health care, Electronic health records, diseases                                                                                                                                                                                                                                                                                                                                                                                                                                                                                                                                                                                                                                                                                                                                                                                                                                                                                                                                                    |
|                                 |                                                                                                                                                                                                                                                                                                                                                                                                                                                                                                                                                                                                                                                                                                                                                                                                                                                                                                                                                                                                                                                                |

SCHOLARONE™  
Manuscripts

## Comparative analysis of methods for identifying multimorbidity patterns: A study of 'real world' data.

1. Albert Roso-Llorach. 1. Institut Universitari d'Investigació en Atenció Primària Jordi Gol (IDIAP Jordi Gol), Gran Via Corts Catalanes, 587 àtic, 08007 Barcelona, Spain. 2. Universitat Autònoma de Barcelona, Bellaterra (Cerdanyola del Vallès), Spain.

E-mail: [aroso@idiapjgol.org](mailto:aroso@idiapjgol.org)

2. Concepción Violán. 1. Institut Universitari d'Investigació en Atenció Primària Jordi Gol (IDIAP Jordi Gol), Gran Via Corts Catalanes, 587 àtic, 08007 Barcelona, Spain. 2. Universitat Autònoma de Barcelona, Bellaterra (Cerdanyola del Vallès), Spain.

E-mail: [cviolan@idiapjgol.org](mailto:cviolan@idiapjgol.org)

3. Quintí Foguet-Boreu. 1. Institut Universitari d'Investigació en Atenció Primària Jordi Gol (IDIAP Jordi Gol), Gran Via Corts Catalanes, 587 àtic, 08007 Barcelona, Spain. 2. Universitat Autònoma de Barcelona, Bellaterra (Cerdanyola del Vallès), Spain. 3. Department of Psychiatry, Vic University Hospital. Francesc Pla el Vigatà, 1, 08500 Vic, Barcelona, Catalonia.

E-mail: [42292qfb@comb.cat](mailto:42292qfb@comb.cat)

4. Teresa Rodriguez-Blanco. Institut Universitari d'Investigació en Atenció Primària Jordi Gol (IDIAP Jordi Gol). Universitat Autònoma de Barcelona, Gran Via Corts Catalanes, 587 àtic, 08007 Barcelona, Spain. E-mail: [trodriquez@idiapjgol.org](mailto:trodriquez@idiapjgol.org)

5. Mariona Pons-Vigués. 1. Institut Universitari d'Investigació en Atenció Primària Jordi Gol (IDIAP Jordi Gol), Gran Via Corts Catalanes, 587 àtic, 08007 Barcelona, Spain. 2. Universitat Autònoma de Barcelona, Bellaterra (Cerdanyola del Vallès), Spain. 3. Faculty of Nursing, University of Girona, Emili Grahit, 77, 17071 Girona, Spain.

E-mail: [mponsv@idiapjgol.org](mailto:mponsv@idiapjgol.org)

6. Enriqueta Pujol-Ribera. 1. Institut Universitari d'Investigació en Atenció Primària Jordi Gol (IDIAP Jordi Gol), Gran Via Corts Catalanes, 587 àtic, 08007 Barcelona, Spain. 2. Universitat Autònoma de Barcelona, Bellaterra (Cerdanyola del Vallès), Spain. 3. Faculty of Nursing, University of Girona, Emili Grahit, 77, 17071 Girona, Spain. E-mail: [epujol@idiapjgol.org](mailto:epujol@idiapjgol.org)

7. Jose M Valderas. Health Services & Policy Research Group, Academic Collaboration for Primary Care, University of Exeter Medical School, Exeter, EX1 2LU, United Kingdom.

E-mail: [J.M.Valderas@exeter.ac.uk](mailto:J.M.Valderas@exeter.ac.uk)

**Corresponding author:** Albert Roso-Llorach. IDIAP Jordi Gol  
Gran Via Corts Catalanes, 587 àtic.08007 Barcelona. Spain.

Telephone: 0034 93 482 41 24. FAX: 0034 93 482 41 74.

Web page: [www.idiapjgol.org](http://www.idiapjgol.org).E-mail: [aroso@idiapjgol.org](mailto:aroso@idiapjgol.org)

**Word count:** 4054

## Comparative analysis of methods for identifying multimorbidity patterns: A study of 'real world' data.

### ABSTRACT

**Objective** The aim was to compare multimorbidity patterns identified with the two most commonly used methods: hierarchical cluster analysis (HCA) and exploratory factor analysis (EFA) in a large primary care database. Specific objectives were 1) to determine how the choice of method may affect the composition of these patterns and 2) to consider the potential application of each method in the clinical setting.

**Design** Cross-sectional study. Diagnoses were based on the 263 corresponding blocks of the International Classification of Diseases (ICD-10). Multimorbidity patterns were identified using HCA and EFA. Analysis was stratified by sex, and results compared for each method.

**Setting and participants** Electronic health records for 408,994 patients with multimorbidity aged 45-64 years in 274 primary health care teams from 2010 in Catalonia, Spain.

**Results** HCA identified 53 clusters for women, with just 12 clusters including at least 2 diagnoses, and 15 clusters for men, all of them including at least 2 diagnoses. EFA showed 9 factors for women and 10 factors for men. We observed differences by sex and method of analysis, although some patterns were consistent. Three combinations of diseases were observed consistently across sex groups and across both methods: hypertension and obesity, spondylopathies and deforming dorsopathies, and dermatitis eczema and mycosis.

**Conclusions** This study showed that multimorbidity patterns vary depending on the method of analysis used (HCA vs EFA) and provided new evidence about the known limitations of attempts to compare multimorbidity patterns between RWD studies. We found that EFA was useful in describing comorbidity relationships and HCA could be useful for in-depth study of multimorbidity. Our results suggest possible applications for each of these methods and add information about some aspects that must be considered in standardization of future studies: spectrum of diseases, data utilization, and methods of analysis.

**Keywords:** Multimorbidity, Cluster analysis, Factor analysis, Primary health care, Electronic health records, diseases

### Strengths and limitations of this study

- This one of the first studies to compare the two methodologies most commonly used to obtain patterns of multimorbidity, Hierarchical Cluster Analysis and Exploratory Factor Analysis.
- The dual analysis was performed in a large, high-quality database of primary care electronic health records that have been shown to be representative of a much larger population, stratified by sex.
- Internal validation with bootstrap methods provided more robust evidence for the cluster analysis.
- The agglomerative hierarchical clustering forces every unit into a single cluster, is exploratory in nature and different clustering algorithms may produce different results.
- The study is cross-sectional and further studies are needed to analyze the patterns that develop longitudinally as individual patients acquire subsequent comorbidities.

## INTRODUCTION

The reliable identification of patterns of multimorbidity is a critical step in developing health care services sensitive to the health needs of these patients.[1] Recent reviews of multimorbidity patterns have shown that individual studies differ widely in their design and choice of epidemiological and statistical methods, including sampling frameworks and selection criteria, coding systems, eligible diseases, and definition of disease clustering patterns.[2–4] These studies highlight the lack of consensus to measure patterns of comorbidity and multimorbidity. In recent years, the number of studies based on real-world data (RWD) [5] has increased significantly, which makes it even more difficult to establish a consensus on how to measure comorbidity and multimorbidity patterns. Although much more information is available, the different databases may not be comparable, making it difficult to arrive at observations and draw firm conclusions. It also limits our ability to compare analyses using RWD and to evaluate whether one approach may be better suited to the purpose. Therefore, it is difficult to identify multimorbidity patterns and provide adequate health services according to the population needs.

The most frequent methods used to date have been hierarchical cluster analysis (HCA) and exploratory factor analysis (EFA), which offer very different approaches and solutions.[2,3] Both are descriptive methods to identify association of diagnoses and determine patterns of multimorbidity. HCA obtains the patterns of multimorbidity from the dissimilarities between diseases, while EFA is based on correlations between diagnoses to identify the patterns. The HCA clusters tend to contain diagnoses that are similar to each other (in terms of Euclidean distances), but dissimilar from the diagnoses in other clusters; no diagnosis can be included in more than one cluster. In contrast, EFA along with confirmatory factor analysis are primarily used to test hypothesized relationships between observed measures and latent constructs. In

1  
2  
3 addition, EFA allows for inclusion of any diagnosis in multiple factors as they can present  
4  
5 significant correlations with more than one factor. [6-9]

6  
7 For all these reasons, the aim was to compare multimorbidity patterns identified with the two  
8  
9 most commonly used methods: hierarchical cluster analysis (HCA) and exploratory factor  
10  
11 analysis (EFA) in a large primary care database. Specific objectives were 1) to determine how  
12  
13 the choice of method may affect the composition of these patterns and 2) to consider the  
14  
15 potential application of each method in the clinical setting.

## 16 17 18 **METHODS**

### 19 20 21 **Design, setting and study population**

22  
23 A cross-sectional study was conducted in Catalonia (Spain), a Mediterranean region with  
24  
25 7,434,632 inhabitants, 81% of which live in urban municipalities (2010 census). The Spanish  
26  
27 National Health Service (NHS) provides universal coverage, financed mainly by tax revenue.  
28  
29 The Catalan Health Institute (CHI) manages primary health care teams (PHCTs) that serve  
30  
31 5,501,784 patients (274 PHCT), or 74% of the population; the remaining PHCTs are managed by  
32  
33 other providers. The CHI's Information System for the Development of Research in Primary  
34  
35 Care (SIDIAP) contains the coded clinical information recorded in electronic health records EHR  
36  
37 by its 274 PHCTs since 2006. A subset of records meeting the highest quality criteria for clinical  
38  
39 data (SIDIAP Q) includes 40% of the SIDIAP population (1,833,125 individuals), attended by the  
40  
41 1,365 general practitioners (GPs) whose data recording scores contain information on the  
42  
43 majority of the population of Catalonia, and is highly representative for the whole region in  
44  
45 terms of geography, age, gender and diseases.[10–12]

46  
47  
48  
49  
50 Prevalence of individual conditions varies with age and so does multimorbidity and their  
51  
52 patterns. In order to obtain a more homogenous sample in terms of multimorbidity, we  
53  
54  
55  
56  
57  
58  
59  
60

1  
2 focussed on individuals aged 45 to 64 years.[13–16] We identified 408,944 individuals aged 45  
3  
4 to 64 years on 31 December 2010 with two or more diagnoses (Appendix 1).  
5  
6

### 7 8 **Coding and selection of diseases**

9  
10 Diseases are coded in SIDIAP using International Classification of Diseases version 10 (ICD-10).  
11  
12 For this study, we selected all active diagnoses recorded in EHR as of December 31, 2010,  
13  
14 except for R codes (symptoms, signs, and abnormal clinical and laboratory findings, not  
15  
16 elsewhere classified) and Z codes (factors influencing health status and contact with health  
17  
18 services).[17] Non-active diagnoses were excluded, based on the presence of an end date in  
19  
20 the EHR. These diagnoses cover a broad list of acute diseases for which the system  
21  
22 automatically assigns an end date (e.g., 60 days after the initial diagnosis).  
23  
24

25  
26 To facilitate management of the diagnostic information, the diagnoses were extracted using  
27  
28 the 263 blocks (disease categories) in the ICD-10 structure. These are homogeneous categories  
29  
30 of very closely related specific diagnoses. For example, Hypertensive diseases include Essential  
31  
32 (primary) hypertension, Hypertensive heart disease, Hypertensive renal disease, Hypertensive  
33  
34 heart and renal disease and Secondary hypertension. To obtain consistent and clinically  
35  
36 interpretable patterns of association, and to avoid spurious relationships that could bias the  
37  
38 results, we considered only diagnoses with greater than 1% prevalence in each sex. All patients  
39  
40 with multimorbidity (2 or more coexisting diagnoses recorded in the EHR on 31 December  
41  
42 2010) were included.  
43  
44

### 45 **Variables**

46  
47 The variables considered were: diagnosis (values: 1 for present, 0 for absent), number of  
48  
49 diseases (2, 3, 4, and 5 or more) and sex (women, men) were also recorded for each patient.  
50  
51

### 52 **Statistical analysis**

53  
54 Data access: Data was obtained from SIDIAP after the study was authorized. All the project's  
55  
56 authors could access the database. Cleaning methods: The analysis was limited to SIDIAP-Q, as  
57  
58



1  
2  
3 the sample was representative of the population.[10–12] No missing values were handled as  
4  
5 sex and age were recorded for all population. Wrong sex-specific diagnoses codes and  
6  
7 diagnoses with inconsistent dates were excluded. An individual with no disease diagnoses  
8  
9 record was considered as disease free.

10  
11  
12 Analyses were stratified by sex. Descriptive statistics were used to summarize overall  
13  
14 information. Categorical variables were expressed as frequencies (percentage) and continuous  
15  
16 as mean (standard deviation, SD) or median (interquartile range, IQR). Two sample test of  
17  
18 proportions and Mann-Whitney test were used to test differences by sex.

19  
20  
21 We identified disease patterns using two approaches: 1) hierarchical cluster analysis (HCA),  
22  
23 and 2) exploratory factor analysis (EFA). Clinical criteria were used to evaluate the consistency  
24  
25 and utility of the final HCA and EFA solutions, based on previously described patterns in the  
26  
27 literature and a consensus opinion drawn from the clinical experience of the research team (4  
28  
29 family physicians, 1 epidemiologist). Clusters and factors in these analyses were considered as  
30  
31 two sets of grouping solutions, which were then assigned to each individual patient. We  
32  
33 considered patients to be associated with a given grouping solution if they had  $\geq 1$  diagnoses in  
34  
35 that solution, allowing for the calculation of the prevalence of each solution in the sample.  
36  
37 Patients could be associated with more than one solution in the same set. We also calculated  
38  
39 prevalence, restricting the assignment of patients to those with  $\geq 2$  diagnoses in the same  
40  
41 solution.  
42  
43

#### 44 45 Hierarchical Cluster Analysis

46  
47 The HCA approach assigns diagnoses to groups or clusters, so that diagnoses in the same  
48  
49 cluster are more similar, based on a given measure, to one another than to diagnoses from  
50  
51 different clusters. The Jaccard coefficient was used to measure similarity. This coefficient  
52  
53 considers only the diagnoses that any two patients have and ignores the diagnoses that  
54  
55 neither of them has.[6] As we do not know a priori the number of clusters to retain from the  
56  
57  
58  
59  
60

1  
2  
3 data, we used agglomerative hierarchical methods to identify possible clustering solutions:  
4  
5 Average linkage, Ward, flexible beta and other methods with less bias, based on  
6  
7 nonparametric estimates, such as Single Linkage and Density Linkage. All but Ward and the  
8  
9 flexible beta methods successively chained the observations into one cluster. Therefore, the  
10  
11 Ward method, which minimizes the variance within clusters and produces clusters of similar  
12  
13 sizes, was chosen as the primary method based on dendrograms analysis.[6] Data were  
14  
15 randomly split into test and training datasets, equal in size and analysed separately. We ran  
16  
17 the Ward method on both samples. The semi-partial R<sup>2</sup>, Calinski-Harabasz pseudo-F- and  
18  
19 pseudo-T<sup>2</sup>-statistic criteria for different numbers of clusters were examined.[6] Clustering  
20  
21 solutions were compared between the test and training datasets, taking into account the  
22  
23 number of clusters, Adjusted Rand Index and clinical criteria. After checking algorithm stability,  
24  
25 Ward method was run on the full data set, applying the same criteria to different numbers of  
26  
27 clusters. Results were compared with flexible beta results, with beta values set at -0.25 and -  
28  
29 0.5. The criteria for selecting the number of clusters were the highest adjusted Rand index with  
30  
31 a high number of clusters and a high pseudo T<sup>2</sup> statistic.[6] To assess internal cluster quality,  
32  
33 we applied multiscale bootstrap resampling to obtain an approximately unbiased (AU)  
34  
35 probability. This probability ('p-value') is the proportion of bootstrapped samples that contain  
36  
37 the cluster; larger p-values indicate more support for the cluster.[18]

40  
41 Multidimensional scaling (MDS) considering two dimensions was used to discover the  
42  
43 underlying structure of distance measures between diseases in the cluster analysis. Essentially,  
44  
45 MDS assigns observations to specific locations in a conceptual space such that the distances  
46  
47 between points in the space match the given dissimilarities as closely as possible. We carried  
48  
49 out classical MDS using the distance matrix obtained in the cluster analysis that considered the  
50  
51 Jaccard coefficient as a dissimilarity measure. The conceptual map of the diseases  
52  
53 distinguishes between the intra-disease cluster and the inter-disease cluster. Taking into  
54  
55 account the final cluster's solution and the obtained groups, conceptual maps of the diseases  
56  
57

1  
2  
3 were created. For a better interpretation of the conceptual map, prevalence of the disease  
4  
5 was represented as the radius of the circle.[19]  
6

#### 7 8 Exploratory Factor Analysis

9  
10 EFA reduces the observed set of diagnoses to a smaller number of latent factors that account  
11  
12 for the correlations between them. As the study variables were dichotomous, the correlation  
13  
14 matrix between the diagnoses was computed using tetrachoric correlations. The factorability  
15  
16 of the matrix was tested using Bartlett Test of Sphericity and Kaiser-Meyer-Olkin (KMO)  
17  
18 Measure of Sampling Adequacy. The extraction of the initial solution was carried out using the  
19  
20 principal factors method with squared multiple correlations for the prior communality  
21  
22 estimates. The optimal number of extracted factors for the final solution was determined with  
23  
24 the Scree plot using the “elbow” rule and setting the percentage of variance equal to 100  
25  
26 percent. Factor loadings were analyzed to identify factor patterns. An oblique rotation,  
27  
28 Oblimin, was performed to clarify the factor pattern in order to better interpret the nature of  
29  
30 the factors, as we assumed that factors were allowed to be associated with each other. As a  
31  
32 rule of thumb, factor loadings greater than or equal to 0.30 in absolute value were considered  
33  
34 to be significant.[7]  
35  
36

#### 37 38 Comparing multimorbidity patterns

39  
40 We compared every cluster and factor solutions across sex groups agreement and the  
41  
42 diagnoses included in it.  
43  
44

45 We considered grouping solutions (HCA vs EFA) from different sets (women vs men) to have  
46  
47 the following degrees of similarity: a) perfect, when the solution included exactly the same  
48  
49 diseases as another solution in the other comparison group (sex or statistical approach); b)  
50  
51 partial, when the solution included a subset of diseases present in a solution in the other  
52  
53 comparison group; and c) none, when each and every disease in the solution was part of a  
54  
55 different solution in the other group and none was part of the same solution. These groups  
56  
57  
58  
59

were named using the abbreviation of sex, method and number (For example, MC1: Men Cluster 1)

We further extracted the common subsets of diseases within partially similar solutions, which together with completely similar solutions gave a comprehensive picture of overlapping cluster and factor analysis solutions.

The analyses were performed using SPSS for Windows, version 18 (SPSS Inc., Chicago, IL, USA), SAS 9.2 for Windows (SAS Institute Inc., Cary, NC, USA) and R version 3.1.2 (R Foundation for Statistical Computing, Vienna, Austria).

## RESULTS

Of 523,656 patients, 408,994 (78.1%) met the multimorbidity criteria; women had a higher multimorbidity prevalence than men (82.2% vs 73.9%, respectively;  $p < 0.001$ ) (Table 1). Both cluster and factor analyses included 79 diagnoses for women and 73 for men.

**Table 1.** Number of diseases, clusters, and factors identified in cluster and factorial analysis for patients 45-64 years-old, stratified by sex (N=523,656)

|                                           | Total, n (%)    | Women, n (%)    | Men, n (%)      |
|-------------------------------------------|-----------------|-----------------|-----------------|
| ≥2 Diagnoses*                             | 408,994 (78.1%) | 217,823 (82.2%) | 191,171 (73.9%) |
| Number of diagnoses*                      |                 |                 |                 |
| 2                                         |                 | 26,106 (12.0%)  | 33,850 (17.7%)  |
| 3                                         |                 | 28,243 (13.0%)  | 33,515 (17.5%)  |
| 4                                         |                 | 28,274 (13.0%)  | 30,356 (15.9%)  |
| ≥5                                        |                 | 135,200 (62.1%) | 93,450 (48.9%)  |
| Median number of diagnoses (IQR)**        |                 | 5 (4-8)         | 4 (3-7)         |
| Number of diagnoses included              |                 | 79              | 73              |
| Number of clusters                        |                 |                 |                 |
| Number of clusters with ≥2 diagnoses      |                 | 12              | 15              |
| Median of diagnoses per clusters (IQR)*** |                 | 2 (2-4)         | 5 (2.5-6)       |
| Number of factors                         |                 |                 |                 |
| Number of factors with ≥2 diagnoses       |                 | 8               | 9               |
| Median of diagnoses per factors (IQR)***  |                 | 5.5 (2.75-7)    | 4 (4-5)         |

Abbreviations: IQR, Inter-quartile range.

\* Two sample test of proportions; all  $p$ -values  $< 0.001$

\*\* Mann-Whitney test;  $P < 0.001$

\*\*\*Median of clusters or factors with ≥2 diseases;  $P < 0.001$

## Hierarchical Cluster analysis

Using HCA with the Ward method, we obtained 53 clusters, with just 12 clusters grouping at least two diagnoses for women and 15 clusters for men (Table 1). We describe only the four most prevalent clusters (Table 2). For a complete description of the clusters and dendrograms, see Appendices 2-5.

**Table 2.** Four most prevalent clusters, by sex group (N(women)=217,823; N(men)=191,171)

| Prevalence 1, %*                | Prevalence 2, %† | Blocks of diagnoses                                                                    | Prevalence in group‡, % | Prevalence in cluster, % | AU p-value**        |
|---------------------------------|------------------|----------------------------------------------------------------------------------------|-------------------------|--------------------------|---------------------|
| <b>WOMEN</b>                    |                  |                                                                                        |                         |                          |                     |
| <b>WC1<sup>^</sup></b><br>82.1  | 52.9             | M50-M54:Other dorsopathies                                                             | 35.8                    | 43.5                     | 0.79<br>(0.74-0.85) |
|                                 |                  | F40-F48:Neurotic, stress-related and somatoform disorders                              | 27.3                    | 33.2                     |                     |
|                                 |                  | M70-M79:Other soft tissue disorders                                                    | 27.0                    | 32.8                     |                     |
|                                 |                  | N80-N98:Noninflammatory disorders of female genital tract                              | 24.2                    | 29.5                     |                     |
|                                 |                  | M20-M25:Other joint disorders                                                          | 18.6                    | 22.6                     |                     |
|                                 |                  | I80-I89:Diseases of veins, lymphatic vessels and lymph nodes, not elsewhere classified | 18.3                    | 22.2                     |                     |
|                                 |                  | D10-D36:Benign neoplasms                                                               | 16.2                    | 19.7                     |                     |
|                                 |                  | M15-M19:Arthrosis                                                                      | 15.7                    | 19.1                     |                     |
| <b>WC2</b><br>55.8              | 23.0             | E70-E90:Metabolic disorders                                                            | 37.4                    | 63.4                     | 0.93<br>(0.86-1.00) |
|                                 |                  | I10-I15:Hypertensive diseases                                                          | 25.6                    | 45.8                     |                     |
|                                 |                  | E65-E68:Obesity and other hyperalimentation                                            | 19.0                    | 34.0                     |                     |
|                                 |                  | E10-E14:Diabetes mellitus                                                              | 7.7                     | 13.7                     |                     |
| <b>WC3</b><br>47.4              | 10.8             | F10-F19:Mental and behavioural disorders due to psychoactive substance use             | 18.7                    | 39.4                     | 0.78<br>(0.73-0.84) |
|                                 |                  | E00-E07:Disorders of thyroid gland                                                     | 14.9                    | 31.4                     |                     |
|                                 |                  | F30-F39:Mood [affective] disorders                                                     | 14.6                    | 30.8                     |                     |
|                                 |                  | M80-M85:Disorders of bone density and structure                                        | 11.3                    | 23.9                     |                     |
| <b>WC4</b><br>32.3              | 6.4              | J00-J06:Acute upper respiratory infections                                             | 12.6                    | 39.1                     | 0.71<br>(0.66-0.77) |
|                                 |                  | K00-K14:Diseases of oral cavity, salivary glands and jaws                              | 12.1                    | 37.3                     |                     |
|                                 |                  | L20-L30:Dermatitis and eczema                                                          | 9.3                     | 28.8                     |                     |
|                                 |                  | B35-B49:Mycoses                                                                        | 5.7                     | 17.8                     |                     |
| <b>MEN</b>                      |                  |                                                                                        |                         |                          |                     |
| <b>MC1<sup>^^</sup></b><br>83.8 | 50.4             | E70-E90:Metabolic disorders                                                            | 42.2                    | 50.3                     | 0.69<br>(0.64-0.75) |
|                                 |                  | F10-F19:Mental and behavioural disorders due to psychoactive substance use             | 33.6                    | 40.1                     |                     |
|                                 |                  | I10-I15:Hypertensive diseases                                                          | 32.5                    | 38.8                     |                     |

|            |      |                                                        |                                                                                               |      |      |                     |
|------------|------|--------------------------------------------------------|-----------------------------------------------------------------------------------------------|------|------|---------------------|
|            |      | M50-M54:Other dorsopathies                             | 27.8                                                                                          | 33.2 |      |                     |
|            |      | E65-E68:Obesity and other hyperalimentation            | 14.6                                                                                          | 17.4 |      |                     |
|            |      | E10-E14:Diabetes mellitus                              | 14.2                                                                                          | 16.9 |      |                     |
| <b>MC2</b> | 57.6 | 24.2                                                   | M70-M79:Other soft tissue disorders                                                           | 16.9 | 29.3 | 0.87<br>(0.84-0.90) |
|            |      |                                                        | N40-N51:Diseases of male genital organs                                                       | 12.1 | 21.0 |                     |
|            |      |                                                        | M20-M25:Other joint disorders                                                                 | 12.1 | 20.9 |                     |
|            |      |                                                        | K20-K31:Diseases of oesophagus, stomach and duodenum                                          | 11.5 | 20.0 |                     |
|            |      |                                                        | I80-I89:Diseases of veins, lymphatic vessels and lymph nodes, not elsewhere classified        | 10.0 | 17.4 |                     |
|            |      |                                                        | K40-K46:Hernia                                                                                | 8.8  | 15.2 |                     |
|            |      |                                                        | D10-D36:Benign neoplasms                                                                      | 8.6  | 14.9 |                     |
|            |      |                                                        | M15-M19:Arthrosis                                                                             | 7.7  | 13.4 |                     |
|            |      | K55-K63:Other diseases of intestines                   | 6.4                                                                                           | 11.1 |      |                     |
| <b>MC3</b> | 54.1 | 20.7                                                   | F40-F48:Neurotic, stress-related and somatoform disorders                                     | 13.5 | 24.9 | 0.79<br>(0.74-0.84) |
|            |      |                                                        | K00-K14:Diseases of oral cavity, salivary glands and jaws                                     | 12.0 | 22.3 |                     |
|            |      |                                                        | J40-J47:Chronic lower respiratory diseases                                                    | 9.3  | 17.2 |                     |
|            |      |                                                        | J00-J06:Acute upper respiratory infections                                                    | 8.9  | 16.4 |                     |
|            |      |                                                        | J30-J39:Other diseases of upper respiratory tract                                             | 8.0  | 14.8 |                     |
|            |      |                                                        | L20-L30:Dermatitis and eczema                                                                 | 7.5  | 13.9 |                     |
|            |      |                                                        | G40-G47:Episodic and paroxysmal disorders                                                     | 7.4  | 13.7 |                     |
|            |      |                                                        | F50-F59:Behavioural syndromes associated with physiological disturbances and physical factors | 6.6  | 12.2 |                     |
|            |      |                                                        | F30-F39:Mood [affective] disorders                                                            | 6.3  | 11.6 |                     |
|            |      | B35-B49:Mycoses                                        | 4.1                                                                                           | 7.6  |      |                     |
| <b>MC4</b> | 25.2 | 4.7                                                    | H90-H95:Other disorders of ear                                                                | 7.7  | 30.6 | 0.87<br>(0.83-0.91) |
|            |      |                                                        | H53-H54:Visual disturbances and blindness                                                     | 3.9  | 15.5 |                     |
|            |      |                                                        | B00-B09:Viral infections characterized by skin and mucous membrane lesions                    | 3.5  | 13.9 |                     |
|            |      |                                                        | L60-L75:Disorders of skin appendages                                                          | 3.5  | 13.9 |                     |
|            |      |                                                        | H10-H13:Disorders of conjunctiva                                                              | 3.0  | 12.0 |                     |
|            |      |                                                        | H49-H52:Disorders of ocular muscles, binocular movement, accommodation and refraction         | 2.8  | 11.2 |                     |
|            |      |                                                        | L80-L99:Other disorders of the skin and subcutaneous tissue                                   | 2.5  | 10.0 |                     |
|            |      |                                                        | L00-L08:Infections of the skin and subcutaneous tissue                                        | 2.1  | 8.3  |                     |
|            |      | H00-H06:Disorders of eyelid, lacrimal system and orbit | 1.6                                                                                           | 6.5  |      |                     |

\*Individuals from the strata  $\geq 1$  diagnosis in the cluster/ † Individuals from the strata with  $\geq 2$  diagnosis in the cluster/#Strata: same sex

\*\*Approximately unbiased (AU) probability-value

^ Abbreviation of Sex, method and number (WC1: Women Cluster 1)

^^ Abbreviation of Sex, method and number (MC1: Men Cluster 1)

1  
2  
3 Twelve clusters with at least two diseases were identified for women, with prevalences  
4 ranging from 6.6% to 82.1% (median: 15.5%), (WC3; WC10). The clusters identified in men had  
5 prevalences ranging from 3.2% to 83.8% (median 10.1%). The most prevalent cluster included  
6  
7 8 diseases in women (WC1: musculoskeletal, psychiatric, circulatory, gynecological and  
8  
9 neoplasms) and 6 in men (MC1: metabolic and circulatory); about half of all patients had at  
10  
11 least two diagnoses (52.9% of women and 50.4% of men).  
12  
13  
14  
15

16 Two clusters were common to men and women, "Spondylopathies" and "Deforming  
17  
18 dorsopathies" (WC11, MC13) and "Urolithiasis" and "Other diseases of the urinary systems"  
19  
20 (WC9, MC12) (Box 1). The remaining clusters showed partial similarity in men and women,  
21  
22 based on six subsets (Box 2), except for three clusters found only in women (WC3, WC7,  
23  
24 WC10) and six only in men (MC4, MC5, MC8, MC10, MC14, MC15) (Appendices 4-5).  
25  
26  
27  
28  
29  
30  
31  
32  
33  
34  
35  
36  
37  
38  
39  
40  
41  
42  
43  
44  
45  
46  
47  
48  
49  
50  
51  
52  
53  
54  
55  
56  
57  
58  
59  
60

**BOXES****Box 1.** Combinations of diseases consistent in both men and women<sup>§</sup>**Clusters**

## Complete (whole) clusters

1. M45-M49:Spondylopathies\*  
M40-M43:Deforming dorsopathies (WC11;MC13)#
2. N20-N23:Urolithiasis  
N30-N39:Other diseases of urinary system (WC9; MC12)

## Subsets within clusters

1. E65-E68:Obesity and other hyperalimentionation  
I0-I15:Hypertensive diseases  
E10-E14:Diabetes mellitus (WC2; MC1)
2. M15-M19:Arthrosis  
M20-M25:Other joint disorders  
I80-I89:Diseases of veins, lymphatic vessels and lymph nodes, not elsewhere classified  
M70-M79:Other soft tissue disorders  
D10-D36:Benign neoplasms (WC1; MC2)
3. L20-L30:Dermatitis and eczema  
B35-B49:Mycoses  
K00-K14:Diseases of oral cavity, salivary glands and jaws  
J00-J06:Acute upper respiratory infections (WC4; MC3)
4. K70-K77:Diseases of liver  
K80-K87:Disorders of gallbladder, biliary tract and pancreas (WC12; MC7)
5. J30-J39:Other diseases of upper respiratory tract  
J40-J47:Chronic lower respiratory diseases (WC6; MC3)
6. K20-K31:Diseases of oesophagus, stomach and duodenum  
K40-K46:Hernia (WC5; MC2)
7. G50-G59:Nerve, nerve root and plexus disorders  
M65-M68:Disorders of synovium and tendon (WC8; MC6)

**Factors\***

## Subgroups within factors

1. I10-I15:Hypertensive diseases  
I20-I25:Ischaemic heart diseases  
I30-I52:Other forms of heart disease  
I70-I79:Diseases of arteries, arterioles and capillaries (WF3; MF2)
2. I10-I15:Hypertensive diseases  
E65-E68:Obesity and other hyperalimentionation (WF2;MF1)
3. J00-J06:Acute upper respiratory infections  
J20-J22:Other acute lower respiratory infections  
J09-J18:Influenza and pneumonia  
B25-B34:Other viral diseases  
A00-A09:Intestinal infectious diseases (WF4; MF6)
4. M15-M19:Arthrosis  
M45-M49:Spondylopathies  
M40-M43:Deforming dorsopathies  
M50-M54:Other dorsopathies (WF1;MF4)
5. K20-K31:Diseases of oesophagus, stomach and duodenum  
Q38-Q45:Other congenital malformations of the digestive system (WF6;MF8)
6. L20-L30:Dermatitis and eczema  
B35-B49:Mycoses  
H53-H54:Visual disturbances and blindness  
H10-H13:Disorders of conjunctiva  
L80-L99:Other disorders of the skin and subcutaneous tissue (WF5;MF5)
7. H25-H28:Disorders of lens  
H30-H36:Disorders of choroid and retina (WF3; MF7)

\* Coincident disease in both sexes

# Abbreviation of Sex (W: Women; M: Men), method (C: Hierarchical Cluster Analysis; F: Factor Analysis) and number (e.g. WC1: Women Cluster 1)

§ No two full factors were exactly the same for both sexes.

Underlined blocks of diagnosis represent coincident diseases in pattern.



**Box 2.** Combinations of diseases consistent across statistical methods (cluster and factor analysis)§

| <b>Women</b> |                                                                                                                                                                                                              |
|--------------|--------------------------------------------------------------------------------------------------------------------------------------------------------------------------------------------------------------|
| 1.           | <u>I10-I15:Hypertensive diseases*</u><br><u>E65-E68:Obesity and other hyperalimentionation</u><br>E10-E14:Diabetes mellitus (WC2; WF2)#                                                                      |
| 2.           | M15-M19:Arthrosis<br>M50-M54:Other dorsopathies<br>M70-M79:Other soft tissue disorders (WC1; WF1)                                                                                                            |
| 3.           | <u>L20-L30:Dermatitis and eczema</u><br><u>B35-B49:Mycoses (WC4; WF5)</u>                                                                                                                                    |
| 4.           | <u>M45-M49:Spondylopathies</u><br><u>M40-M43:Deforming dorsopathies (WC11; WF1)</u>                                                                                                                          |
| 5.           | K20-K31:Diseases of oesophagus, stomach and duodenum<br>K40-K46:Hernia (WC5; WF6)                                                                                                                            |
| 6.           | K70-K77:Diseases of liver<br>K80-K87:Disorders of gallbladder, biliary tract and pancreas (WC12 ;WF6)                                                                                                        |
| <b>Men</b>   |                                                                                                                                                                                                              |
| 1.           | <u>I10-I15:Hypertensive diseases</u><br><u>E65-E68:Obesity and other hyperalimentionation</u><br>E70-E90:Metabolic disorders (MC1; MF1)                                                                      |
| 2.           | I20-I25:Ischaemic heart diseases<br>I30-I52:Other forms of heart disease<br>I60-I69:Cerebrovascular diseases<br>I70-I79:Diseases of arteries, arterioles and capillaries<br>N17-N19:Renal failure (MC5; MF2) |
| 3.           | J09-J18:Influenza and pneumonia<br>J20-J22:Other acute lower respiratory infections<br>B25-B34:Other viral diseases<br>A00-A09:Intestinal infectious diseases (MC10; MF6)                                    |
| 4.           | H10-H13:Disorders of conjunctiva<br>H53-H54:Visual disturbances and blindness<br>L80-L99:Other disorders of the skin and subcutaneous tissue (MC4; MF5)                                                      |
| 5.           | <u>M45-M49:Spondylopathies</u><br><u>M40-M43:Deforming dorsopathies (MC13; MF4)</u>                                                                                                                          |
| 6.           | <u>L20-L30:Dermatitis and eczema</u><br><u>B35-B49:Mycoses (MC3; MF5)</u>                                                                                                                                    |
| 7.           | K70-K77:Diseases of liver<br>B15-B19:Viral hepatitis (MC7; MF3)                                                                                                                                              |
| 8.           | T08-T14:Injuries to unspecified part of trunk, limb or body region<br>S90-S99:Injuries to the ankle and foot (MC8; MF9)                                                                                      |
| 9.           | H25-H28:Disorders of lens<br>H40-H42:Glaucoma (MC14; MF7)                                                                                                                                                    |

\* Coincident disease in both methods

# Abbreviation of Sex (W: Women; M: Men), method (C: Hierarchical Cluster Analysis; F: Factor Analysis) and number (e.g. WC1: Women Cluster 1)§ All subgroups of factors or clusters, no single cluster exactly the same as a factor.  
Underlined blocks of diagnosis represent coincident diseases in pattern.

The top four clusters were reproduced in the graphical representation of coordinates using MDS. The most prevalent disease clusters were more clearly separated in women than they were in men, mostly due to the overlap of MC2 and MC3 (Figure 1).

### Exploratory Factor Analysis

Using EFA, we obtained nine factors for women and 10 factors for men. In this analysis, the median number of diagnoses per factor was higher in women (Table 1). Two factors explained more than 50% of total variance (58.5% for women (WF2; WF3) and 50.7% for men (MF1; MF2)). All diseases were assigned to single factors except for three diseases, two in women only (J20-J22: Other acute lower respiratory infections and E10-E14: Diabetes mellitus) and one in both women and men (I10-I15: Hypertensive diseases); all three were assigned to two factors. The first four factors are described in Table 3; full factor solutions are shown in Appendices 6-7.

**Table 3.** Four most prevalent factors, by sex (N(women)=217,823; N(men)=191,171)

| Prevalence 1, %*               | Prevalence 2, %† | Blocks of diagnoses**                                    | Prevalence in group, % | Prevalence in factor, % | Variance proportion, % | Cumulative Variance proportion, % |
|--------------------------------|------------------|----------------------------------------------------------|------------------------|-------------------------|------------------------|-----------------------------------|
| <b>WOMEN</b>                   |                  |                                                          |                        |                         |                        |                                   |
| <b>WF1<sup>^</sup></b><br>59.7 | 25.4             | M50-M54:Other dorsopathies                               | 35.8                   | 59.9                    | 10.6                   | 69.1                              |
|                                |                  | M70-M79:Other soft tissue disorders                      | 27.0                   | 45.2                    |                        |                                   |
|                                |                  | M15-M19:Arthrosis                                        | 15.7                   | 26.2                    |                        |                                   |
|                                |                  | G50-G59:Nerve, nerve root and plexus disorders           | 8.5                    | 14.3                    |                        |                                   |
|                                |                  | M45-M49:Spondylopathies                                  | 4.3                    | 7.3                     |                        |                                   |
|                                |                  | M40-M43:Deforming dorsopathies                           | 3.8                    | 6.4                     |                        |                                   |
| <b>WF2</b><br>37.8             | 12.0             | I10-I15:Hypertensive diseases                            | 25.6                   | 67.6                    | 7.0                    | 84.5                              |
|                                |                  | E65-E68:Obesity and other hyperalimentionation           | 19.0                   | 50.2                    |                        |                                   |
|                                |                  | E10-E14:Diabetes mellitus                                | 7.7                    | 20.3                    |                        |                                   |
| <b>WF3</b><br>32.8             | 8.1              | I10-I15:Hypertensive diseases                            | 25.6                   | 78.0                    | 20.2                   | 58.6                              |
|                                |                  | E10-E14:Diabetes mellitus                                | 7.7                    | 23.4                    |                        |                                   |
|                                |                  | I30-I52:Other forms of heart disease                     | 4.4                    | 13.3                    |                        |                                   |
|                                |                  | H25-H28:Disorders of lens                                | 1.7                    | 5.3                     |                        |                                   |
|                                |                  | H30-H36:Disorders of choroid and retina                  | 1.2                    | 3.6                     |                        |                                   |
|                                |                  | I70-I79:Diseases of arteries, arterioles and capillaries | 1.1                    | 3.2                     |                        |                                   |
|                                |                  | I20-I25:Ischaemic heart diseases                         | 1.0                    | 3.1                     |                        |                                   |
| <b>WF4</b><br>27.6             | 5.9              | J00-J06:Acute upper respiratory infections               | 12.6                   | 45.8                    | 38.3                   | 38.3                              |
|                                |                  | N30-N39:Other diseases of urinary system                 | 5.9                    | 21.3                    |                        |                                   |
|                                |                  | H60-H62:Diseases of external ear                         | 3.6                    | 13.1                    |                        |                                   |
|                                |                  | J20-J22:Other acute lower respiratory infections         | 3.4                    | 12.2                    |                        |                                   |
|                                |                  | A00-A09:Intestinal infectious diseases                   | 2.7                    | 10.0                    |                        |                                   |

|                                 |      |                                                                            |      |      |      |      |
|---------------------------------|------|----------------------------------------------------------------------------|------|------|------|------|
|                                 |      | H65-H75:Diseases of middle ear and mastoid                                 | 2.5  | 9.2  |      |      |
|                                 |      | J09-J18:Influenza and pneumonia                                            | 1.7  | 6.1  |      |      |
|                                 |      | B25-B34:Other viral diseases                                               | 1.3  | 4.8  |      |      |
|                                 |      | M60-M63:Disorders of muscles                                               | 1.2  | 4.4  |      |      |
| <b>MEN</b>                      |      |                                                                            |      |      |      |      |
| <b>MF1<sup>^^</sup></b><br>61.7 | 26.1 | E70-E90:Metabolic disorders                                                | 42.2 | 68.3 | 5.1  | 94.8 |
|                                 |      | I10-I15:Hypertensive diseases                                              | 32.6 | 52.7 |      |      |
|                                 |      | E65-E68:Obesity and other hyperalimentionation                             | 14.6 | 23.6 |      |      |
|                                 |      | M05-M14:Inflammatory polyarthropathies                                     | 5.4  | 8.7  |      |      |
| <b>MF2</b><br>39.4              | 8.7  | I10-I15:Hypertensive diseases                                              | 32.5 | 82.6 | 28.5 | 28.5 |
|                                 |      | I30-I52:Other forms of heart disease                                       | 6.9  | 17.6 |      |      |
|                                 |      | I20-I25:Ischaemic heart diseases                                           | 5.0  | 12.6 |      |      |
|                                 |      | I70-I79:Diseases of arteries, arterioles and capillaries                   | 2.4  | 6.1  |      |      |
|                                 |      | I60-I69:Cerebrovascular diseases                                           | 1.8  | 4.6  |      |      |
|                                 |      | N17-N19:Renal failure                                                      | 1.5  | 3.7  |      |      |
| <b>MF3</b><br>38.5              | 4.4  | F10-F19:Mental and behavioural disorders due to psychoactive substance use | 33.6 | 87.2 | 5.3  | 89.6 |
|                                 |      | K70-K77:Diseases of liver                                                  | 5.2  | 13.6 |      |      |
|                                 |      | B15-B19:Viral hepatitis                                                    | 3.2  | 8.4  |      |      |
|                                 |      | F20-F29:Schizophrenia, schizotypal and delusional disorders                | 1.1  | 2.9  |      |      |
| <b>MF4</b><br>34.7              | 5.1  | M50-M54:Other dorsopathies                                                 | 27.8 | 80.2 | 7.3  | 77.8 |
|                                 |      | M15-M19:Arthrosis                                                          | 7.7  | 22.2 |      |      |
|                                 |      | M45-M49:Spondylopathies                                                    | 3.1  | 8.8  |      |      |
|                                 |      | M40-M43:Deforming dorsopathies                                             | 1.8  | 5.2  |      |      |

\*Individuals from the strata  $\geq 1$  diagnosis in the factor/ † Individuals from the strata with  $\geq 2$  diagnosis in the factor/#Strata: same sex

\*\*KMO sampling adequacy index was 0.82 for women and 0.75 for men. Bartlett Test of Sphericity was statistically significant. ( $p < 0.001$ ) for both groups

^ Abbreviation of Sex, method and number (WF1: Women Factor 1)

^^ Abbreviation of Sex, method and number (MC1: Men Factor 1)

Although no factor-based groupings were identical in men and women, almost all showed partial similarity by sex, based on seven subsets (Box 1), except for two groups found only in women (WF7, WF9) and one found only in men (MF9).

Multimorbidity patterns comparison across statistical approaches

The EFA multimorbidity patterns were more easily interpreted than the HCA groups, either because they made more sense from a clinical perspective or because of greater homogeneity

1  
2  
3 in the diagnoses: about half of the factors containing at least 3 diagnoses corresponded to a  
4 maximum of 2 ICD-10 blocks, compared to about one fifth of the HCA clusters with at least 3  
5 diseases (1/5 for women and 2/11 for men). No grouping solution for women or for men  
6 contained exactly the same set of diseases as a cluster and as a factor. Six clusters (WC3, WC6,  
7 WC7, WC8, WC9, WC10) and two factors (WF7, WF9) were only observed in women. However,  
8 six subsets of diseases were part of the same grouping in both a cluster and a factor (Box 2); all  
9 included two or three diagnoses, usually from the same ICD chapter. Five clusters and one  
10 factor were observed only in men (MC6, MC9, MC11, MC12, MC15 and MF6). Nine subsets of  
11 diseases were observed as part of the same grouping in both a cluster and a factor (Box 2).  
12 They included a range of diseases (2-5) and most frequently included diseases from different  
13 ICD chapters.

14  
15  
16  
17  
18  
19  
20  
21  
22  
23  
24  
25  
26  
27  
28  
29  
30  
31  
32  
33  
34  
35  
36  
37  
38  
39  
40  
41  
42  
43  
44  
45  
46  
47  
48  
49  
50  
51  
52  
53  
54  
55  
56  
57  
58  
59  
60

Three paired diseases were observed consistently in both men and women using both methods of analysis: 1) Hypertensive diseases and obesity/other hyperalimentation; 2) spondylopathies and deforming dorsopathies; and 3) dermatitis/eczema and mycoses.

## DISCUSSION

In this study we have observed differences in the groupings identified with the two most frequently used methods (HCA and EFA). No grouping solution contained exactly the same set of diseases as a cluster and as a factor, although some overlap was observed in both groups. Internal quality validation with AU p-values showed strong evidence of the multimorbidity patterns in the data.

The multimorbidity patterns obtained by HCA were identified graphically with MDS, allowing us to observe a given hierarchical structure. Nevertheless, internal quality validation with AU p-values showed strong evidence of the multimorbidity patterns in the data.

1  
2  
3 EFA, based on tetrachoric correlations where the dichotomous diseases were assumed to  
4  
5 come from an underlying mechanism with a continuous variable, produced a wide range of  
6  
7 multimorbidity patterns with several levels of correlations. Most of them seem to be highly  
8  
9 consistent from a clinical perspective. The multimorbidity patterns obtained with EFA show a  
10  
11 main factor (a disease) that has a correlation with another disease, either coexisting or that  
12  
13 may occur during the patient's clinical course. [20] Thus, EFA could be more useful for  
14  
15 analyzing comorbidity and for describing the correlation between diseases that have a  
16  
17 pathophysiological relationship. This approach also may help to answer the question of which  
18  
19 condition should be considered the main disease and which the comorbidity.  
20

21  
22 The HCA results would be useful in generating new hypotheses for intercluster and intracluster  
23  
24 associations between diseases that could be applied to the analysis of multimorbidity, defined  
25  
26 as the random coexistence of diseases or clusters that indicates significant associations  
27  
28 between diseases without a causal explanation. In future studies, other non-hierarchical  
29  
30 cluster analysis techniques will improve measurement of the observed distances and multiple  
31  
32 interrelationships between different diseases in a given individual.[21] On the other hand, EFA  
33  
34 could be more useful for analyzing multimorbidity patterns in the absence of causal  
35  
36 comorbidity and for describing visual representation of diseases correlation with a  
37  
38 pathophysiological relationship between them.  
39

40  
41 We obtained two perfect clusters that were common to both men and women:  
42  
43 "spondylopathies and deforming dorsopathies" and "urolithiasis and other diseases of the  
44  
45 urinary system". In the first cluster, spondylosis is a degenerative disorder that may cause loss  
46  
47 of normal spinal structure and function and lead to scoliosis. Nevertheless, many individuals  
48  
49 with untreated scoliosis will develop spondylosis; this may be one reason why these diseases  
50  
51 were associated.[22] The second cluster can be explained by the complications produced by  
52  
53 urolithiasis (such as urinary tract infection, persistent proteinuria, stress incontinence or other  
54  
55 unspecified urinary incontinence) and those that have a pathophysiological explanation. [23]  
56  
57  
58  
59  
60

1  
2  
3 EFA showed that the most frequent pattern in women was infectious diseases. This previously  
4 unreported pattern suggests that the multimorbidity patterns obtained in other studies are  
5 affected by the type of diseases included in each study.  
6  
7

8  
9 Although the patterns obtained with both methods did not match exactly, finding matching  
10 pairs of diseases by both methods reinforces the idea that patterns of multimorbidity have a  
11 dominant disease that associates in some way with other diseases.  
12  
13

14  
15 In general, it is difficult to compare our results with other studies because of variations in  
16 methods, data sources and structures, and populations and diseases studied. Six studies have  
17 been performed with HCA[8,21,24–27] and three using EFA.[28–30] Until now, very few  
18 analyses of multimorbidity patterns have used multiple methods to compare the same  
19 population.[21] The latter study included people aged 50 years and older, considering 11  
20 diseases and using 2 different cluster methods, hierarchical (average linkage) and  
21 nonhierarchical (k-medoids), and one method for EFA (principal component analysis). The  
22 observed differences between this study and our results can be explained by differences in the  
23 underlying statistical formulae and diseases considered in both studies.  
24  
25  
26  
27  
28  
29  
30  
31  
32  
33

34 The major strength of this study is the dual analysis (HCA and EFA) of a large, high-quality  
35 database of primary care records that have been shown to be representative of a much larger  
36 population, stratified by sex. Admittedly, this analysis of almost all potential diagnoses may  
37 have added a complexity that will hinder interpretation of findings and comparison with other  
38 studies, particularly because the boundaries between chronic and acute disease are not always  
39 clear.[31,32] Whatever consistency (or discrepancy) we observed was validated by the findings  
40 of two different approaches, which helps to identify the most appropriate use of each method  
41 in analyzing multimorbidity. We emphasize that the inclusion of chronic and acute diseases is a  
42 strength and not a weakness. Because, as we have shown, there are many chronic and acute  
43 diseases that coexist at a set time and this has implications for health care.  
44  
45  
46  
47  
48  
49  
50  
51  
52  
53  
54  
55  
56  
57  
58  
59  
60

1  
2  
3 Internal validation with bootstrap methods, AU p-values, and MDS techniques provided more  
4 robust evidence for the cluster analysis. The KMO values obtained show the adequacy of fit of  
5 the factor analysis. These values were similar or higher than previous studies.[28,29]  
6

7  
8 A limitation of this study is our use of agglomerative hierarchical clustering, which forces every  
9 unit (i.e., diagnosis) into a single cluster. HCA is exploratory in nature, and different clustering  
10 algorithms may produce different results.[33] The final clustering solution presented here was  
11 obtained through a systematic and rigorous process: comparing the results from a randomly  
12 split dataset, testing different clustering algorithms, and using different objective numeric  
13 criteria to decide the number of clusters, internal validation, and graphical representation. In  
14 addition, a panel of experts applied subjective clinical criteria to assess the interpretability of  
15 the groupings in everyday practice. In addition, EFA is problematic for binary data, which can  
16 be grouped because of having similar distributions rather than any common underlying  
17 feature. On the other hand, in factor analysis the measure of association incorporates  
18 information on both positive and negative concordances [9]. In contrast, the analysis of  
19 clusters allows us to show that the occurrence of one or more health conditions can be  
20 conditioned by their co-occurrence, without considering negative concordances. [8] Due to the  
21 absence of a standard methodology to compare method solutions we have used ad hoc  
22 methodology. Finally, another limitation is our use of ICD-10 3-character codes as the unit of  
23 analysis, rather than the more specific individual diagnosis, but its use is justified to avoid  
24 spurious relationships that more than 10,000 individual codes of the ICD-10 could produce.  
25  
26  
27  
28  
29  
30  
31  
32  
33  
34  
35  
36  
37  
38  
39  
40  
41  
42  
43  
44

45 This is a cross-sectional study, based on EHR of The Catalan Health Institute and SIDIAP-Q is  
46 highly representative for the whole region in terms of both geography, age, gender and  
47 diseases, that avoid selection bias.  
48  
49

50  
51 Multimorbidity can present a problem for health services delivery, affecting patients, health  
52 professionals and managers who are attempting to improve service delivery. Our study offers  
53 two methodological approaches to understanding the relationships between specific diseases,  
54  
55  
56  
57  
58

1  
2  
3 which is an essential step in improving our approach to this problem. Although we  
4  
5 demonstrated that different analytical methods can yield different results, we also showed  
6  
7 that some associations were consistent in both analyses. This study illustrates the need to pay  
8  
9 careful attention to the methods used to support policies and decision-making. Clinical  
10  
11 guidelines tend to focus on a single disease rather than on multimorbidity, which includes not  
12  
13 only diseases but also drug interactions and polypharmacy. The present study confirmed that  
14  
15 multimorbidity patterns are a reality in the adult population, and do not apply only to chronic  
16  
17 diseases. New guidelines are needed that incorporate multimorbidity into clinical  
18  
19 recommendations.  
20

21  
22 This study was one of the first to compare the two most commonly used methodologies, HCA  
23  
24 and EFA, in a large database that includes a large number of diseases. The findings reveal  
25  
26 another limitation to be taken into account in comparing multimorbidity patterns between  
27  
28 studies: in addition to the spectrum, number and type of diseases included, these patterns  
29  
30 vary depending on the method of analysis used.  
31

32  
33 The results suggest that HCA can be useful to detect multimorbidity patterns and identify  
34  
35 different associations between diseases, as the method allows for the possibility that one or  
36  
37 more health problems can occur conditionally. On the other hand, EFA seems more applicable  
38  
39 to clinical practice because places less restrictions in the diseases grouping, so may be better  
40  
41 for generating hypotheses and is more sensitive in identifying clinical associations. Our results  
42  
43 suggest that these aspects be considered in planning of future studies, including selection of  
44  
45 diseases and methods of analysis.  
46

47  
48 Finally, our analysis of multimorbidity patterns only considered associations between diseases.  
49  
50 Further studies are needed to analyze the patterns that develop longitudinally as individual  
51  
52 patients acquire subsequent comorbidities.  
53  
54  
55  
56  
57  
58  
59  
60



## Conclusions

The multimorbidity patterns obtained with EFA show a main factor (i.e., a disease) that has some correlation with the additional diseases in the pattern, suggesting a comorbidity relationship. Meanwhile, the HCA would be useful for in-depth study of multimorbidity pattern. We introduced new evidence about the known limitations of attempts to compare multimorbidity or comorbidity patterns between RWD studies, as our results add information about aspects that must be considered in standardization of future studies: spectrum of diseases, data utilization, and methods of analysis.

## Footnotes

**Contributors:** All authors contributed to the design of the study, revised the article, and approved the final version. CV and QFB obtained the funding. ARL and CV drafted the article. ARL, CV, QFB, TRB, MPV, EPR and JMV contributed to the analysis and interpretation of data. ARL and CV wrote the first draft, and all authors (ARL, CV, QFB, TRB, MPV, EPR and JMV) contributed ideas, interpreted the findings and reviewed rough drafts of the manuscript. All authors read and approved the final manuscript.

**Funding:** The project has been funded by the *Instituto de Salud Carlos III* of the Ministry of Economy and Competitiveness (Spain) through the Network for Prevention and Health Promotion in Primary Health Care (rediAPP, RD12/0005/0001; RD16/0007/001), and by European Union ERDF funds. Also, by a grant for research projects on health from ISCiii (PI12/00427) and co-financed with European Union ERDF funds). Jose M. Valderas was supported by the National Institute for Health Research Clinician Scientist Award NIHR/CS/010/024. The funders had no role in the study design, collection, analysis and interpretation of data, writing of the manuscript or decision to submit for publication. The views expressed in this publication are those of the author(s) and not necessarily those of the National Health Service, the National Institute for Health Research, or the National Department of Health.

**Competing interests:** None declared.

**Ethical considerations:** The study protocol was approved by the Committee on the Ethics of Clinical Research, IDIAP Jordi Gol (Protocol No: P12/28). All data were anonymized and EHR confidentiality was respected in accordance with national and international law.

**Acknowledgment:** We thank the Catalan Health Institute and especially the SIDIAP Unit, which provided the database for the study. The authors also appreciate the English language review by Elaine Lilly, PhD, and are grateful to Carmen Ibáñez for administrative work.

**Availability of data and material:** The datasets are not available because researchers have signed an agreement with the Information System for the Development of Research in Primary Care (SIDIAP) concerning confidentiality and security of the dataset that forbids providing data to third parties. This organization is subject to periodic audits to ensure the validity and quality of the data.

## References

1. Valderas J, Starfield B, Sibbald B, et al. Defining comorbidity: Implications for understanding health and health services. *Ann Fam Med* 2009;**7**: 357–363.
2. Violan C, Foguet-Boreu Q, Flores-Mateo G, et al. Prevalence, determinants and patterns of multimorbidity in primary care: a systematic review of observational studies. *PLoS One* 2014;**9**: e102149.
3. Prados-Torres A, Calderón-Larrañaga A, Hanco-Saavedra J, et al. Multimorbidity patterns: A systematic review. *J Clin Epidemiol* 2014;**67**: 254–266.
4. Fortin M, Stewart M, Poitras ME, et al. A systematic review of prevalence studies on multimorbidity: Toward a more uniform methodology. *Ann Fam Med* 2012;**10**: 142–151.
5. Corrao, G., Mancia, G., Generating evidence from computerized health care utilization databases. *Hypertension* 2015; **65**(3):490-8.
- 6.. Everitt B, Landau S, Leese M, et al. Cluster Analysis. 5th ed. Hoboken: Wiley; 2011.
7. Thompson B. Exploratory and Confirmatory Factor Analysis: Understanding Concepts and Applications. Washington, DC: American Psychological Association; 2004.
8. Cornell JE, Pugh JA, Williams J, et al. Multimorbidity clusters: clustering binary data from multimorbidity clusters : clustering binary data from a large administrative medical database. *Appl Multivar Res* 2007;**12**: 163–182.
9. Nunnally J, Berstein I. Psychometric theory. 3rd ed. New York: McGraw-Hill, Inc; 1994.
- 10.. Del Mar Garcia-Gil M, Hermosilla E, Prieto-Alhambra D, et al. Construction and validation of a scoring system for the selection of high-quality data in a Spanish population primary care database (SIDIAP). *Inform Prim Care* 2012;**19**: 135–145.
11. Prieto-Alhambra D, Judge A, Javaid MK, et al. Incidence and risk factors for clinically diagnosed knee, hip and hand osteoarthritis: influences of age, gender and osteoarthritis affecting other joints. *Ann Rheum Dis* 2014;**73**: 1659–64.

- 1  
2  
3 12. Ramos R, Balló E, Marrugat J, et al. Validity for use in research on vascular diseases of the  
4 SIDIAP (Information System for the Development of Research in Primary Care): the EMMA  
5 study. *Rev Esp Cardiol (Engl Ed)* 2012;**65**: 29–37.  
6  
7  
8  
9 13. Foguet-Boreu Q, Violán C, Rodriguez-Blanco T, et al. Multimorbidity Patterns in Elderly  
10 Primary Health Care Patients in a South Mediterranean European Region: A Cluster Analysis.  
11 *PLoS One* 2015;**10**: e0141155.  
12  
13  
14  
15 14. Foguet-Boreu Q, Violan C, Roso-Llorach A, et al. Impact of multimorbidity: acute morbidity,  
16 area of residency and use of health services across the life span in a region of south Europe.  
17 *BMC Fam Pract* 2014;**15**: 55.  
18  
19  
20  
21 15. Violán C, Foguet-Boreu Q, Roso-Llorach A, et al. Burden of multimorbidity, socioeconomic  
22 status and use of health services across stages of life in urban areas: a cross-sectional study.  
23 *BMC Public Health* 2014;**14**: 1–13.  
24  
25  
26  
27 16. Violán C, Foguet-Boreu Q, Roso-Llorach A, et al. Patrones de multimorbilidad en adultos  
28 jóvenes en Cataluña: un análisis de clústeres. *Aten Primaria* 2016; **48**:479-92.  
29  
30  
31  
32 17. World Health Organization. ICD-10 International Statistical Classification of Diseases and  
33 Related Health Problems 10th Revision. 2007.  
34  
35  
36  
37 18. Shimodaira H. Approximately unbiased tests of regions using multistep-multiscale  
38 bootstrap resampling 32: *Ann Stat* 2004;**32**: 2616–2641.  
39  
40  
41 19. Borg I. Modern Multidimensional Scaling: theory and applications (2nd ed.). 2 nd. Springer-  
42 Verlag, editor. New York; 2005.  
43  
44  
45 20. Feinstein AR. The pre-therapeutic classification of co-morbidity in chronic disease. *J*  
46 *Chronic Dis* 1970; **23**(7):455-68.  
47  
48  
49 21. Islam M, Valderas J, Yen L, et al. Multimorbidity and comorbidity of chronic diseases among  
50 the senior Australians: prevalence and patterns. *PLoS One* 2014;**9**: e83783.  
51  
52  
53 22. Pappou IP, Girardi FP, Sandhu HS, et al. Discordantly high spinal bone mineral density  
54 values in patients with adult lumbar scoliosis. *Spine (Phila Pa 1976)*. 2006;**31**: 1614–1620.  
55  
56  
57  
58  
59  
60

- 1  
2  
3 23. Bartoletti R, Cai T, Mondaini N, et al. Epidemiology and risk factors in urolithiasis. *Urol Int*  
4  
5 2007;**79** Suppl 1: 3–7.  
6  
7 24. Formiga F, Ferrer A, Sanz H, et al. Patterns of comorbidity and multimorbidity in the oldest  
8  
9 old: The Octabaix study. *Eur J Intern Med* 2013;**24**: 40–44.  
10  
11 25. John R, Kerby DS and Hennessy CH. Patterns and impact of comorbidity and multimorbidity  
12  
13 among community-resident American Indian elders. *Gerontologist* 2003;**43**: 649–660.  
14  
15 26. Marengoni A, Rizzuto D, Wang HX, et al. Patterns of chronic multimorbidity in the elderly  
16  
17 population. *J Am Geriatr Soc* 2009;**57**: 225–230.  
18  
19 27. Newcomer SR, Steiner JF and Bayliss EA. Identifying subgroups of complex patients with  
20  
21 cluster analysis. *Am J Manag Care* 2011;**17**: e324–32.  
22  
23 28. Schäfer I, von Leitner EC, Schön G, et al. Multimorbidity patterns in the elderly: a new  
24  
25 approach of disease clustering identifies complex interrelations between chronic conditions.  
26  
27 *PLoS One* 2010;**5**: e15941.  
28  
29 29. Andre L, Prados-torres A, Poblador-plou B, et al. Multimorbidity Patterns in Primary Care :  
30  
31 Interactions among Chronic Diseases Using Factor Analysis. *PLoS One* 2012;**7**(2): e32190.  
32  
33 30. Poblador-Plou B, van den Akker M, Vos R, et al. Similar multimorbidity patterns in primary  
34  
35 care patients from two European regions: results of a factor analysis. *PLoS One* 2014;**9**:  
36  
37 e100375.  
38  
39 31. O'Halloran J, Miller GC and Britt H. Defining chronic conditions for primary care with ICPC-  
40  
41 2. *Fam Pract* 2004;**21**: 381–386.  
42  
43 32. Lamberts H and Wood M. International Classification of Primary Care. Oxford. Press OU,  
44  
45 editor. Oxford; 2011.  
46  
47 33. Aldenderfer MS and Blashfield RK. Cluster Analysis: Quantitative Applications in the Social  
48  
49 Sciences. 1984.  
50  
51  
52  
53  
54  
55  
56  
57  
58  
59  
60

**Figure 1**

**Figure 1a.** Top four clusters in women (n= 217,823) aged 45-64 years, analyzed with multidimensional scaling.

**Figure 1b.** Top four clusters in men (n= 191,171) aged 45-64 years, analyzed with multidimensional scaling.

**Appendix**

**Appendix 1.** Study Flow Chart.

**Appendix 2.** Cluster dendrogram in women aged 45-64 years.

**Appendix 3.** Cluster dendrogram in men aged 45-64 years, with approximately unbiased (AU) probability value.

**Appendix 4.** Prevalence and composition of diagnostic clusters in women aged 45-64 years (n= 217,823).

**Appendix 5.** Prevalence and composition of diagnostic clusters in men aged 45-64 years (n= 191,171).

**Appendix 6.** Factors in women aged 45-64 years (n= 217,823).

**Appendix 7.** Factors in men aged 45-64 years (n= 191,171).

Figure 1a. Top four clusters in women (n= 217,823) aged 45-64 years, analyzed with multidimensional scaling

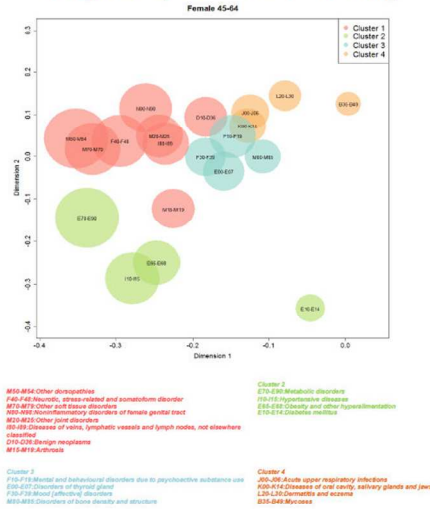

**Cluster 1**  
 M50-M52 Other osteopathies  
 F40-F49 Neurotic, stress-related and somatoform disorder  
 M20-M29 Other joint diseases  
 M20-M29 Noninflammatory disorders of female genital tract  
 M20-M29 Other joint diseases  
 I60-I69 Diseases of veins, lymphatic vessels and lymph nodes, not elsewhere classified  
 I70-I79 Design receptors identified  
 M10-M19 Arthritis

**Cluster 2**  
 E70-E90 Metabolic disorders  
 I20-I25 Hypertensive disease  
 I40-I49 Coronary and other hyperalimentation  
 E10-E14 Diabetes mellitus

**Cluster 3**  
 F10-F19 Mental and behavioural disorders due to psychoactive substance use  
 I20-I25 Diseases of heart  
 F30-F39 Mood (affective) disorders  
 M00-M99 Diseases of bone density and structure

**Cluster 4**  
 J20-J29 Acute upper respiratory infections  
 J00-J06 Diseases of ear, nose, throat and mouth  
 J30-J39 Disorders of eye, orbit, lacrimal glands and jaws  
 I20-I25 Coronary and other hyperalimentation  
 E10-E14 Diabetes mellitus

Note: The cluster number are the same as expressed in table 2.

Figure 1 b. Top four clusters in men (n= 191,171) aged 45-64 years, analyzed with multidimensional scaling

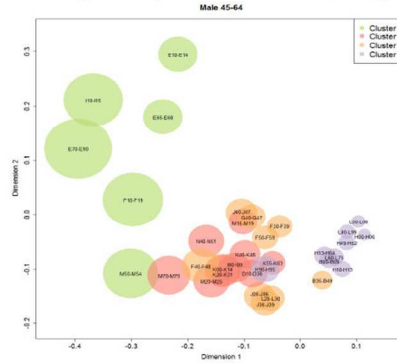

**Cluster 1**  
 E70-E90 Metabolic disorders  
 F10-F19 Mental and behavioural disorders due to psychoactive substance use  
 I20-I25 Hypertensive disease  
 M50-M52 Other osteopathies  
 E10-E14 Diabetes mellitus

**Cluster 2**  
 M50-M52 Other osteopathies  
 F40-F49 Neurotic, stress-related and somatoform disorder  
 M20-M29 Other joint diseases  
 M20-M29 Noninflammatory disorders of female genital tract  
 M20-M29 Other joint diseases  
 I60-I69 Diseases of veins, lymphatic vessels and lymph nodes, not elsewhere classified  
 I70-I79 Design receptors identified  
 M10-M19 Arthritis

**Cluster 3**  
 F10-F19 Mental and behavioural disorders due to psychoactive substance use  
 I20-I25 Diseases of heart  
 F30-F39 Mood (affective) disorders  
 M00-M99 Diseases of bone density and structure

**Cluster 4**  
 J20-J29 Acute upper respiratory infections  
 J00-J06 Diseases of ear, nose, throat and mouth  
 J30-J39 Disorders of eye, orbit, lacrimal glands and jaws  
 I20-I25 Coronary and other hyperalimentation  
 E10-E14 Diabetes mellitus

Figure 1

Figure 1a. Top four clusters in women (n= 217,823) aged 45-64 years, analyzed with multidimensional scaling.

Figure 1b. Top four clusters in men (n= 191,171) aged 45-64 years, analyzed with multidimensional scaling.

97x64mm (300 x 300 DPI)

## Appendix 1. Study Flow Chart.

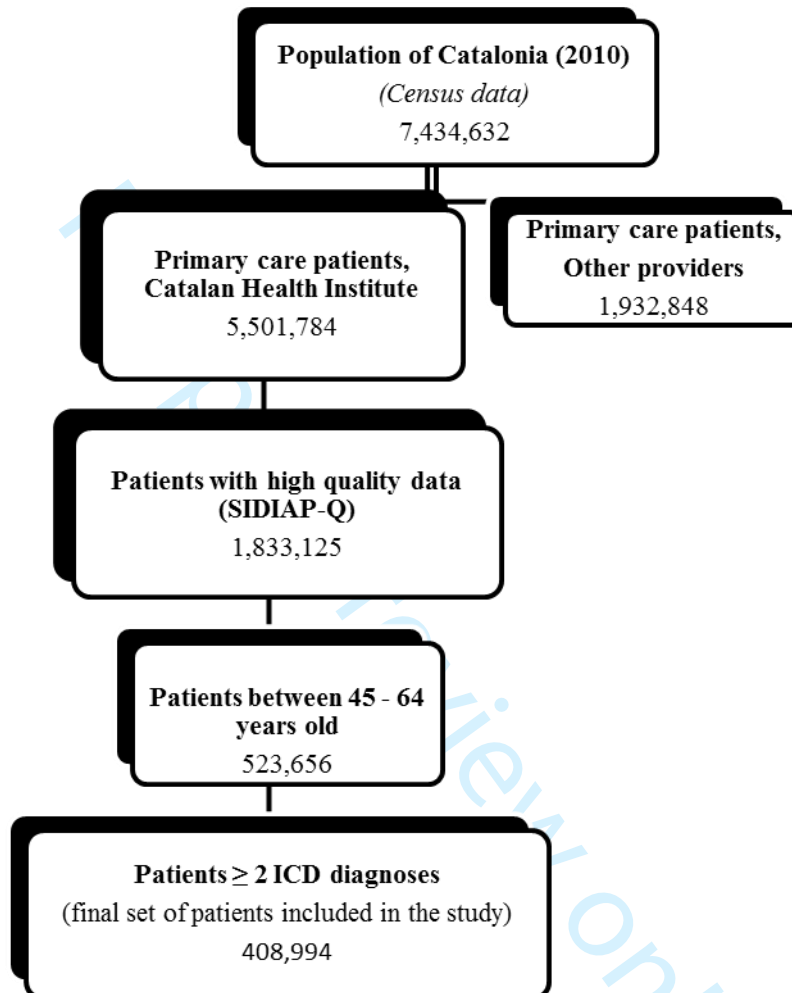



## Appendix 2. Cluster dendrogram in women aged 45-64 years.

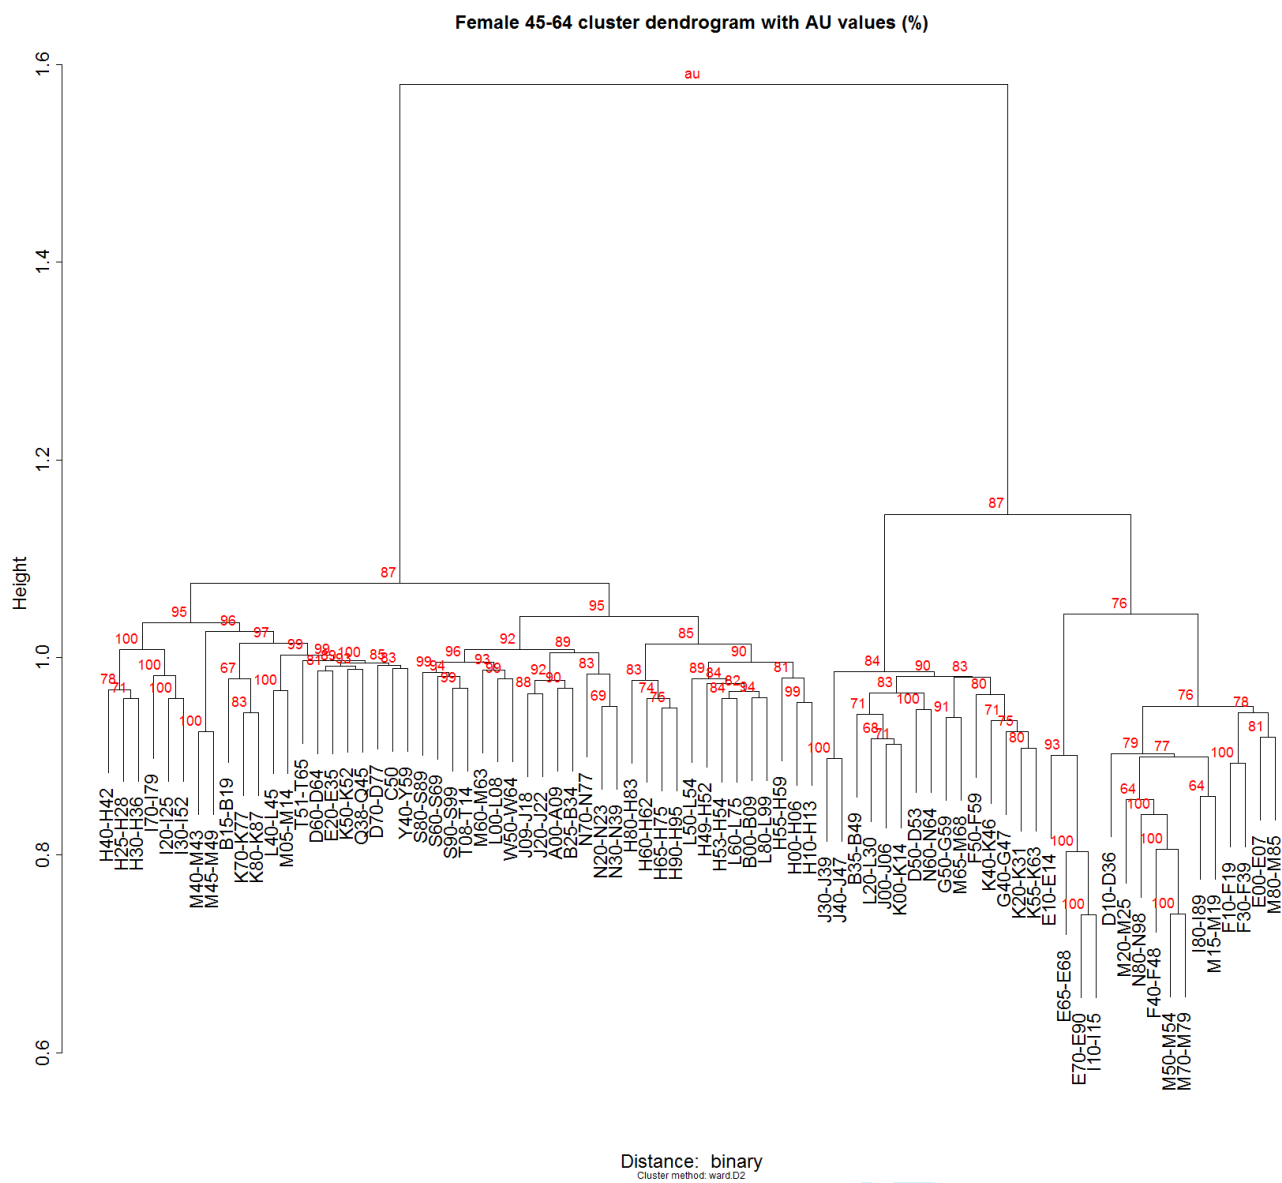

### Appendix 3. Cluster dendrogram in men aged 45-64 years, with approximately unbiased (AU) probability value.

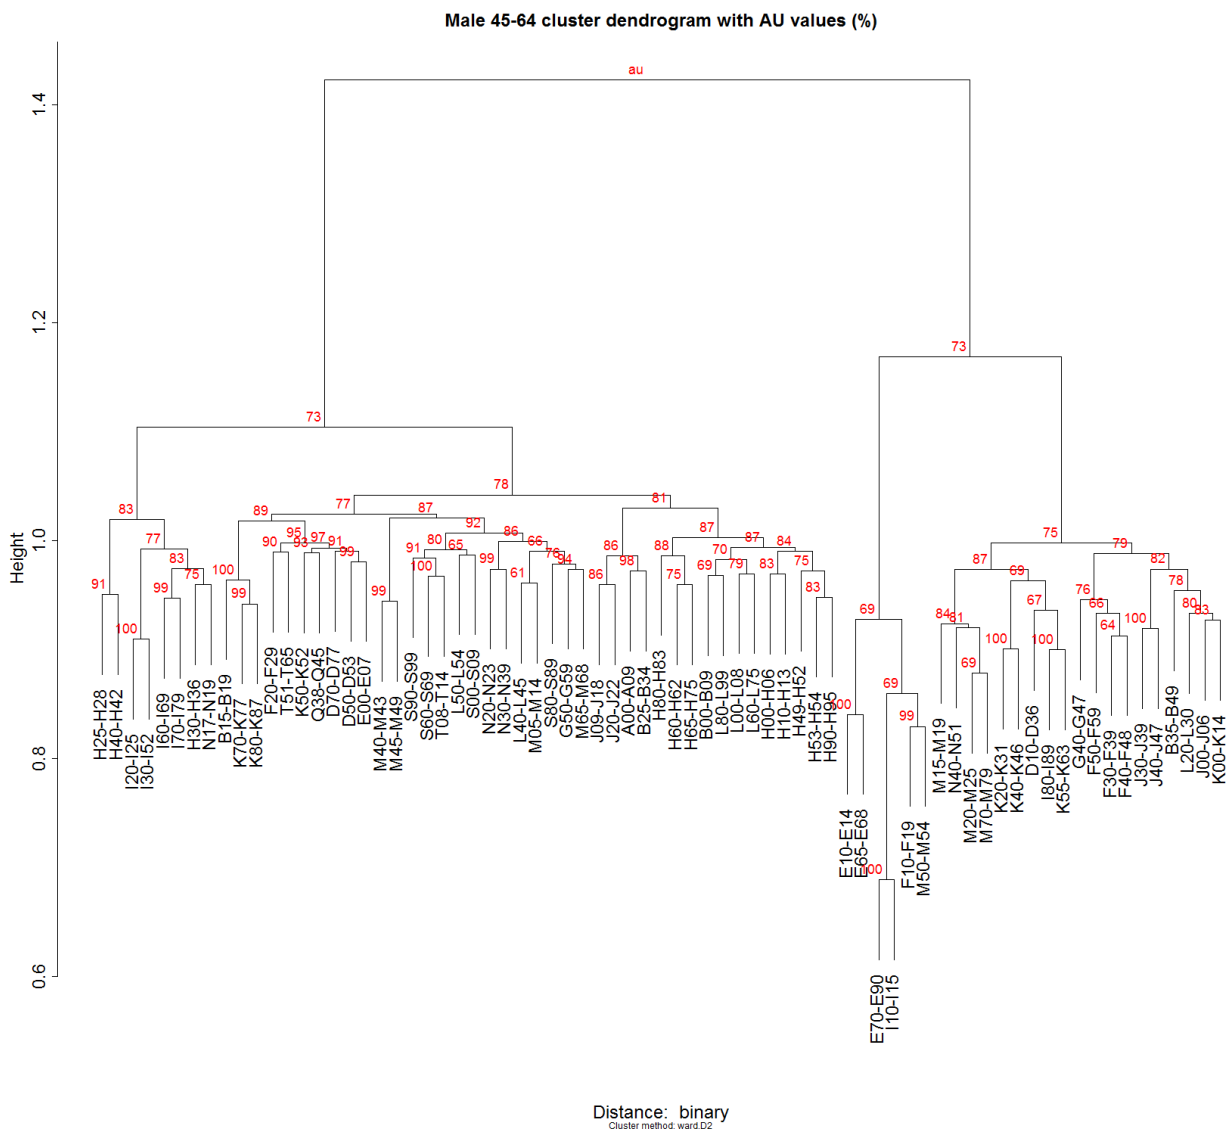

**Appendix 4.** Prevalence and composition of diagnostic clusters in women aged 45-64 years (n= 217,823).

| Cluster order number, n           | Prevalence 1 (%)* | Prevalence 2 (%)† | Blocks of diagnoses                                                                    | Prevalence in group‡, % | Prevalence in cluster, % | Most prevalent diagnoses of the block                         | AU p-value**     |
|-----------------------------------|-------------------|-------------------|----------------------------------------------------------------------------------------|-------------------------|--------------------------|---------------------------------------------------------------|------------------|
| <b>WC1<sup>^</sup></b><br>178,849 | 82.1              | 52.9              | M50-M54:Other dorsopathies                                                             | 35.8                    | 43.5                     | M54 Dorsalgia                                                 | 0.79 (0.74-0.85) |
|                                   |                   |                   | F40-F48:Neurotic, stress-related and somatoform disorders                              | 27.3                    | 33.2                     | F41 Other anxiety disorders                                   |                  |
|                                   |                   |                   | M70-M79:Other soft tissue disorders                                                    | 27.0                    | 32.8                     | M79 Other soft tissue disorders, not elsewhere classified     |                  |
|                                   |                   |                   | N80-N98:Noninflammatory disorders of female genital tract                              | 24.2                    | 29.5                     | N95 Menopausal and other perimenopausal disorders             |                  |
|                                   |                   |                   | M20-M25:Other joint disorders                                                          | 18.6                    | 22.6                     | M25 Other joint disorders, not elsewhere classified           |                  |
|                                   |                   |                   | I80-I89:Diseases of veins, lymphatic vessels and lymph nodes, not elsewhere classified | 18.3                    | 22.2                     | I83 Varicose veins of lower extremities                       |                  |
|                                   |                   |                   | D10-D36:Benign neoplasms                                                               | 16.2                    | 19.7                     | D25 Leiomyoma of uterus                                       |                  |
|                                   |                   |                   | M15-M19:Arthrosis                                                                      | 15.7                    | 19.1                     | M17 Gonarthrosis [arthrosis of knee]                          |                  |
| <b>WC2</b><br>121,564             | 55.8              | 23.0              | E70-E90:Metabolic disorders                                                            | 35.4                    | 63.4                     | E78 Disorders of lipoprotein metabolism and other lipidaemias | 0.93 (0.86-1.00) |
|                                   |                   |                   | I10-I15:Hypertensive diseases                                                          | 25.6                    | 45.8                     | I10 Essential (primary) hypertension                          |                  |
|                                   |                   |                   | E65-E68:Obesity and other hyperalimentation                                            | 19.0                    | 34.0                     | E66 Obesity                                                   |                  |
|                                   |                   |                   | E10-E14:Diabetes mellitus                                                              | 7.7                     | 13.7                     | E11 Non-insulin-                                              |                  |

|                       |      |      |                                                                            |      |      |                                                            |                  |
|-----------------------|------|------|----------------------------------------------------------------------------|------|------|------------------------------------------------------------|------------------|
|                       |      |      |                                                                            |      |      | dependent diabetes mellitus                                |                  |
| <b>WC3</b><br>103,147 | 47.4 | 10.8 | F10-F19:Mental and behavioural disorders due to psychoactive substance use | 18.6 | 39.4 | F17 Mental and behavioural disorders due to use of tobacco | 0.78 (0.73-0.84) |
|                       |      |      | E00-E07:Disorders of thyroid gland                                         | 14.9 | 31.4 | E03 Other hypothyroidism                                   |                  |
|                       |      |      | F30-F39:Mood [affective] disorders                                         | 14.6 | 30.8 | F32 Depressive episode                                     |                  |
|                       |      |      | M80-M85:Disorders of bone density and structure                            | 11.3 | 23.9 | M81 Osteoporosis without pathological fracture             |                  |
| <b>WC4</b><br>70,294  | 32.3 | 6.4  | J00-J06:Acute upper respiratory infections                                 | 12.6 | 39.1 | J00 Acute nasopharyngitis [common cold]                    | 0.71 (0.66-0.77) |
|                       |      |      | K00-K14:Diseases of oral cavity, salivary glands and jaws                  | 12.1 | 37.3 | K02 Dental caries                                          |                  |
|                       |      |      | L20-L30:Dermatitis and eczema                                              | 9.3  | 28.8 | L29 Pruritus                                               |                  |
|                       |      |      | B35-B49:Mycoses                                                            | 5.7  | 17.8 | B35 Dermatophytosis                                        |                  |
| <b>WC5</b><br>63,792  | 29.3 | 6.0  | K20-K31:Diseases of oesophagus, stomach and duodenum                       | 11.4 | 38.9 | K30 Dyspepsia                                              | 0.71 (0.66-0.76) |
|                       |      |      | G40-G47:Episodic and paroxysmal disorders                                  | 10.5 | 36.0 | G43 Migraine                                               |                  |
|                       |      |      | K55-K63:Other diseases of intestines                                       | 8.6  | 29.2 | K59 Other functional intestinal disorders                  |                  |
|                       |      |      | K40-K46:Hernia                                                             | 5.7  | 19.4 | K44 Diaphragmatic hernia                                   |                  |
| <b>WC6</b><br>34,707  | 15.9 | 1.6  | J30-J39:Other diseases of upper respiratory tract                          | 9.4  | 59.0 | J30 Vasomotor and allergic rhinitis                        | 1.00             |
|                       |      |      | J40-J47:Chronic lower respiratory diseases                                 | 8.2  | 51.2 | J45 Asthma                                                 |                  |
| <b>WC7</b><br>32,674  | 15.0 | 0.8  | D50-D53:Nutritional anaemias                                               | 8.3  | 55.2 | D50 Iron deficiency anaemia                                | 1.00             |
|                       |      |      | N60-N64:Disorders of breast                                                | 7.5  | 50.1 | N60 Benign mammary                                         |                  |

|                        |      |     |                                                                                               |     |       |                                                      |                  |
|------------------------|------|-----|-----------------------------------------------------------------------------------------------|-----|-------|------------------------------------------------------|------------------|
|                        |      |     |                                                                                               |     |       | dysplasia                                            |                  |
| <b>WC8</b><br>27,150   | 12.5 | 0.8 | G50-G59:Nerve, nerve root and plexus disorders                                                | 8.5 | 68.6  | G56 Mononeuropathies of upper limb                   | 0.91 (0.88-0.94) |
|                        |      |     | M65-M68:Disorders of synovium and tendon                                                      | 4.7 | 37.5  | M65 Synovitis and tenosynovitis                      |                  |
| <b>WC9</b><br>19,199   | 8.8  | 0.4 | N30-N39:Other diseases of urinary system                                                      | 5.9 | 66.7  | N39 Other disorders of urinary system                | 0.69 (0.62-0.75) |
|                        |      |     | N20-N23:Urolithiasis                                                                          | 3.4 | 38.3  | N20 Calculus of kidney and ureter                    |                  |
| <b>WC10</b><br>18,439  | 8.5  | 0.4 | H90-H95:Other disorders of ear                                                                | 6.3 | 75.0  | H91 Other hearing loss                               | 0.75 (0.70-0.80) |
|                        |      |     | H65-H75:Diseases of middle ear and mastoid                                                    | 2.5 | 30.1  | H65 Nonsuppurative otitis media                      |                  |
| <b>WC11</b><br>16,535  | 7.6  | 0.6 | M45-M49:Spondylopathies                                                                       | 4.3 | 57.1  | M47 Spondylosis                                      | 1.00             |
|                        |      |     | M40-M43:Deforming dorsopathies                                                                | 3.8 | 50.4  | M41 Scoliosis                                        |                  |
| <b>WC12</b><br>14, 335 | 6.6  | 0.4 | K80-K87:Disorders of gallbladder, biliary tract and pancreas                                  | 4.0 | 60.9  | K80 Cholelithiasis                                   | 0.83*            |
|                        |      |     | K70-K77:Diseases of liver                                                                     | 2.9 | 44.7  | K76 Other diseases of liver                          |                  |
| <b>WC13</b><br>12,320  | 5.7  | 0.0 | F50-F59:Behavioural syndromes associated with physiological disturbances and physical factors | 5.7 | 100.0 | F51 Nonorganic sleep disorders                       |                  |
| <b>WC14</b><br>10,357  | 4.8  | 0.0 | L60-L75:Disorders of skin appendages                                                          | 4.8 | 100.0 | L72 Follicular cysts of skin and subcutaneous tissue |                  |
| <b>WC15</b><br>9,555   | 4.4  | 0.0 | H53-H54:Visual disturbances and blindness                                                     | 4.4 | 100.0 | H54 Blindness and low vision                         |                  |
| <b>WC16</b><br>9,521   | 4.4  | 0.0 | I30-I52:Other forms of heart disease                                                          | 4.4 | 100.0 | I34 Nonrheumatic mitral valve disorders              |                  |
| <b>WC17</b><br>9,442   | 4.3  | 0.0 | B00-B09:Viral infections characterized by skin and mucous membrane lesions                    | 4.3 | 100.0 | B07 Viral warts                                      |                  |
| <b>WC18</b><br>8,541   | 3.9  | 0.0 | T08-T14:Injuries to unspecified part of trunk, limb or body region                            | 3.9 | 100.0 | T14 Injury of unspecified body region                |                  |

|                      |     |     |                                                                                       |     |       |                                                                    |  |
|----------------------|-----|-----|---------------------------------------------------------------------------------------|-----|-------|--------------------------------------------------------------------|--|
| <b>WC19</b><br>8,268 | 3.8 | 0.0 | H10-H13:Disorders of conjunctiva                                                      | 3.8 | 100.0 | H10 Conjunctivitis                                                 |  |
| <b>WC20</b><br>7,866 | 3.6 | 0.0 | H60-H62:Diseases of external ear                                                      | 3.6 | 100.0 | H61 Other disorders of external ear                                |  |
| <b>WC21</b><br>7,714 | 3.5 | 0.0 | H49-H52:Disorders of ocular muscles, binocular movement, accommodation and refraction | 3.5 | 100.0 | H52 Disorders of refraction and accommodation                      |  |
| <b>WC22</b><br>7,512 | 3.4 | 0.0 | L50-L54:Urticaria and erythema                                                        | 3.4 | 100.0 | L50 Urticaria                                                      |  |
| <b>WC23</b><br>7,298 | 3.4 | 0.0 | J20-J22:Other acute lower respiratory infections                                      | 3.4 | 100.0 | J20 Acute bronchitis                                               |  |
| <b>WC24</b><br>7,251 | 3.3 | 0.0 | L80-L99:Other disorders of the skin and subcutaneous tissue                           | 3.3 | 100.0 | L82 Seborrhoeic keratosis                                          |  |
| <b>WC25</b><br>6,178 | 2.8 | 0.0 | H00-H06:Disorders of eyelid, lacrimal system and orbit                                | 2.8 | 100.0 | H04 Disorders of lachrymal system                                  |  |
| <b>WC26</b><br>5,993 | 2.8 | 0.0 | H40-H42:Glaucoma                                                                      | 2.8 | 100.0 | H40 Glaucoma                                                       |  |
| <b>WC27</b><br>5,986 | 2.7 | 0.0 | A00-A09:Intestinal infectious diseases                                                | 2.7 | 100.0 | A09 Diarrhoea and gastroenteritis of presumed infectious origin    |  |
| <b>WC28</b><br>5,890 | 2.7 | 0.0 | M05-M14:Inflammatory polyarthropathies                                                | 2.7 | 100.0 | M13 Other arthritis                                                |  |
| <b>WC29</b><br>5,548 | 2.5 | 0.0 | S80-S89:Injuries to the knee and lower leg                                            | 2.5 | 100.0 | S83 Dislocation, sprain and strain of joints and ligaments of knee |  |
| <b>WC30</b><br>5,416 | 2.5 | 0.0 | C50-C50:Malignant neoplasm of breast                                                  | 2.5 | 100.0 | C50 Malignant neoplasm of breast                                   |  |
| <b>WC31</b><br>5,372 | 2.5 | 0.0 | L40-L45:Papulosquamous disorders                                                      | 2.5 | 100.0 | L40 Psoriasis                                                      |  |
| <b>WC32</b><br>5,336 | 2.4 | 0.0 | H80-H83:Diseases of inner ear                                                         | 2.4 | 100.0 | H81 Disorders of vestibular function                               |  |
| <b>WC33</b>          | 2.0 | 0.0 | S90-S99:Injuries to the ankle and                                                     | 2.0 | 100.0 | S93 Dislocation, sprain                                            |  |

|               |     |     |                                                                                                 |     |       |                                                                              |  |
|---------------|-----|-----|-------------------------------------------------------------------------------------------------|-----|-------|------------------------------------------------------------------------------|--|
| 4,374         |     |     | foot                                                                                            |     |       | and strain of joints and ligaments at ankle and foot level                   |  |
| WC34<br>3,882 | 1.8 | 0.0 | B15-B19:Viral hepatitis                                                                         | 1.8 | 100.0 | B18 Chronic viral hepatitis                                                  |  |
| WC35<br>3,758 | 1.7 | 0.0 | H25-H28:Disorders of lens                                                                       | 1.7 | 100.0 | H25 Senile cataract                                                          |  |
| WC36<br>3,744 | 1.7 | 0.0 | K50-K52:Noninfective enteritis and colitis                                                      | 1.7 | 100.0 | K52 Other non-infective gastro-enteritis and colitis                         |  |
| WC37<br>3,689 | 1.7 | 0.0 | N70-N77:Inflammatory diseases of female pelvic organs                                           | 1.7 | 100.0 | N76 Other inflammation of vagina and vulva                                   |  |
| WC38<br>3,646 | 1.7 | 0.0 | J09-J18:Influenza and pneumonia                                                                 | 1.7 | 100.0 | J11 Influenza, virus not identified                                          |  |
| WC39<br>3,399 | 1.6 | 0.0 | L00-L08:Infections of the skin and subcutaneous tissue                                          | 1.6 | 100.0 | L03 Cellulitis                                                               |  |
| WC40<br>3,284 | 1.5 | 0.0 | Q38-Q45:Other congenital malformations of the digestive system                                  | 1.5 | 100.0 | Q40 Other congenital malformations of upper alimentary tract                 |  |
| WC41<br>3,180 | 1.5 | 0.0 | D60-D64:Aplastic and other anaemias                                                             | 1.5 | 100.0 | D64 Other anaemias                                                           |  |
| WC42<br>3,055 | 1.4 | 0.0 | W50-W64:Exposure to animate mechanical forces                                                   | 1.4 | 100.0 | W57 Bitten or stung by non-venomous insect and other non-venomous arthropods |  |
| WC43<br>2,926 | 1.3 | 0.0 | Y40-Y59:Drugs, medicaments and biological substances causing adverse effects in therapeutic use | 1.3 | 100.0 | Y52 Agents primarily affecting the cardiovascular system                     |  |
| WC44<br>2,884 | 1.3 | 0.0 | B25-B34:Other viral diseases                                                                    | 1.3 | 100.0 | B34 Viral infection of unspecified site                                      |  |
| WC45<br>2,788 | 1.3 | 0.0 | E20-E35:Disorders of other endocrine glands                                                     | 1.3 | 100.0 | E28 Ovarian dysfunction                                                      |  |
| WC46<br>2,765 | 1.3 | 0.0 | S60-S69:Injuries to the wrist and hand                                                          | 1.3 | 100.0 | S61 Open wound of wrist and hand                                             |  |

|                      |      |     |                                                                       |     |       |                                                      |  |
|----------------------|------|-----|-----------------------------------------------------------------------|-----|-------|------------------------------------------------------|--|
| <b>WC47</b><br>2,645 | 1.2  | 0.0 | H55-H59:Other disorders of eye and adnexa                             | 1.2 | 100.0 | H57 Other disorders of eye and adnexa                |  |
| <b>WC48</b><br>2,612 | 1.2  | 0.0 | M60-M63:Disorders of muscles                                          | 1.2 | 100.0 | M62 Other disorders of muscle                        |  |
| <b>WC49</b><br>2,600 | 1.2  | 0.0 | H30-H36:Disorders of choroid and retina                               | 1.2 | 100.0 | H35 Other retinal disorders                          |  |
| <b>WC50</b><br>2,584 | 1.2  | 0.0 | D70-D77:Other diseases of blood and blood-forming organs              | 1.2 | 100.0 | D72 Other disorders of white blood cells             |  |
| <b>WC51</b><br>2,508 | 1.2  | 0.0 | T51-T65:Toxic effects of substances chiefly nonmedicinal as to source | 1.2 | 100.0 | T65 Toxic effect of other and unspecified substances |  |
| <b>WC52</b><br>2,309 | 1.1  | 0.0 | I70-I79:Diseases of arteries, arterioles and capillaries              | 1.1 | 100.0 | I73 Other peripheral vascular diseases               |  |
| <b>WC53</b><br>2,241 | 1.03 | 0.0 | I20-I25:Ischaemic heart diseases                                      | 1.0 | 100.0 | I25 Chronic ischaemic heart disease                  |  |

\* Standard error to large

\*\*Approximately unbiased (AU) probability-value

^ Abbreviation of sex, method and number (WC1: Women Cluster 1)



## Appendix 5. Prevalence and composition of diagnostic clusters in men aged 45-64 years (n= 191,171).

| Cluster order number, n           | Prevalence 1 .%* | Prevalence 2, %† | Blocks of diagnoses                                                                    | Prevalence in group‡, % | Prevalence in cluster, % | Most prevalent diagnoses of the block                         | AU p-value*      |
|-----------------------------------|------------------|------------------|----------------------------------------------------------------------------------------|-------------------------|--------------------------|---------------------------------------------------------------|------------------|
| <b>MC1<sup>^</sup></b><br>160,216 | 83.8             | 50.4             | E70-E90:Metabolic disorders                                                            | 42.2                    | 50.3                     | E78 Disorders of lipoprotein metabolism and other lipidaemias | 0.69 (0.64-0.75) |
|                                   |                  |                  | F10-F19:Mental and behavioural disorders due to psychoactive substance use             | 33.6                    | 40.1                     | F17 Mental and behavioural disorders due to use of tobacco    |                  |
|                                   |                  |                  | I10-I15:Hypertensive diseases                                                          | 32.5                    | 38.8                     | I10 Essential (primary) hypertension                          |                  |
|                                   |                  |                  | M50-M54:Other dorsopathies                                                             | 27.8                    | 33.2                     | M54 Dorsalgia                                                 |                  |
|                                   |                  |                  | E65-E68:Obesity and other hyperalimentation                                            | 14.6                    | 17.4                     | E66 Obesity                                                   |                  |
|                                   |                  |                  | E10-E14:Diabetes mellitus                                                              | 14.2                    | 16.9                     | E11 Non-insulin-dependent diabetes mellitus                   |                  |
| <b>MC2</b><br>110,200             | 57.6             | 24.2             | M70-M79:Other soft tissue disorders                                                    | 16.9                    | 29.3                     | M75 Shoulder lesions                                          | 0.87 (0.84-0.90) |
|                                   |                  |                  | N40-N51:Diseases of male genital organs                                                | 12.1                    | 21.0                     | N40 Hyperplasia of prostate                                   |                  |
|                                   |                  |                  | M20-M25:Other joint disorders                                                          | 12.0                    | 20.9                     | M25 Other joint disorders, not elsewhere classified           |                  |
|                                   |                  |                  | K20-K31:Diseases of oesophagus, stomach and duodenum                                   | 11.5                    | 20.0                     | K29 Gastritis and duodenitis                                  |                  |
|                                   |                  |                  | I80-I89:Diseases of veins, lymphatic vessels and lymph nodes, not elsewhere classified | 10.0                    | 17.4                     | I84 Haemorrhoids                                              |                  |
|                                   |                  |                  | K40-K46:Hernia                                                                         | 8.8                     | 15.2                     | K40 Inguinal hernia                                           |                  |

|                       |      |      |                                                                                               |      |      |                                                                     |                  |
|-----------------------|------|------|-----------------------------------------------------------------------------------------------|------|------|---------------------------------------------------------------------|------------------|
|                       |      |      | D10-D36:Benign neoplasms                                                                      | 8.6  | 14.9 | D17 Benign lipomatous neoplasm                                      |                  |
|                       |      |      | M15-M19:Arthrosis                                                                             | 7.7  | 13.4 | M17 Gonarthrosis [arthrosis of knee]                                |                  |
|                       |      |      | K55-K63:Other diseases of intestines                                                          | 6.4  | 11.1 | K62 Other diseases of anus and rectum                               |                  |
| <b>MC3</b><br>103,365 | 54.1 | 20.7 | F40-F48:Neurotic, stress-related and somatoform disorders                                     | 13.5 | 24.9 | F41 Nutritional marasmus                                            | 0.79 (0.74-0.84) |
|                       |      |      | K00-K14:Diseases of oral cavity, salivary glands and jaws                                     | 12.0 | 22.3 | K02 Dental caries                                                   |                  |
|                       |      |      | J40-J47:Chronic lower respiratory diseases                                                    | 9.3  | 17.2 | J44 Other chronic obstructive pulmonary disease                     |                  |
|                       |      |      | J00-J06:Acute upper respiratory infections                                                    | 8.9  | 16.4 | J00 Acute nasopharyngitis [common cold]                             |                  |
|                       |      |      | J30-J39:Other diseases of upper respiratory tract                                             | 8.0  | 14.8 | J30 Vasomotor and allergic rhinitis                                 |                  |
|                       |      |      | L20-L30:Dermatitis and eczema                                                                 | 7.5  | 13.9 | L21 Seborrhoeic dermatitis                                          |                  |
|                       |      |      | G40-G47:Episodic and paroxysmal disorders                                                     | 7.4  | 13.7 | G47 Sleep disorders                                                 |                  |
|                       |      |      | F50-F59:Behavioural syndromes associated with physiological disturbances and physical factors | 6.6  | 12.2 | F52 Sexual dysfunction, not caused by organic disorder or disease   |                  |
|                       |      |      | F30-F39:Mood [affective] disorders                                                            | 6.3  | 11.6 | F32 Depressive episode                                              |                  |
|                       |      |      | B35-B49:Mycoses                                                                               | 4.1  | 7.6  | B35 Dermatophytosis                                                 |                  |
| <b>MC4</b><br>48,140  | 25.2 | 4.7  | H90-H95:Other disorders of ear                                                                | 7.7  | 30.6 | H91 Disorders of sclera and cornea in diseases classified elsewhere | 0.87 (0.83-0.91) |
|                       |      |      | H53-H54:Visual disturbances and blindness                                                     | 3.9  | 15.5 | H54 Blindness and low vision                                        |                  |
|                       |      |      | B00-B09:Viral infections characterized by skin and                                            | 3.5  | 13.9 | B07 Viral warts                                                     |                  |

|                      |      |     |                                                                                       |     |      |                                                                    |                  |
|----------------------|------|-----|---------------------------------------------------------------------------------------|-----|------|--------------------------------------------------------------------|------------------|
|                      |      |     | mucous membrane lesions                                                               |     |      |                                                                    |                  |
|                      |      |     | L60-L75:Disorders of skin appendages                                                  | 3.5 | 13.9 | L72 Follicular cysts of skin and subcutaneous tissue               |                  |
|                      |      |     | H10-H13:Disorders of conjunctiva                                                      | 3.0 | 12.0 | H10 Conjunctivitis                                                 |                  |
|                      |      |     | H49-H52:Disorders of ocular muscles, binocular movement, accommodation and refraction | 2.8 | 11.2 | H52 Disorders of refraction and accommodation                      |                  |
|                      |      |     | L80-L99:Other disorders of the skin and subcutaneous tissue                           | 2.5 | 10.0 | L82 Seborrhoeic keratosis                                          |                  |
|                      |      |     | L00-L08:Infections of the skin and subcutaneous tissue                                | 2.1 | 8.3  | L02 Cutaneous abscess, furuncle and carbuncle                      |                  |
|                      |      |     | H00-H06:Disorders of eyelid, lacrimal system and orbit                                | 1.6 | 6.5  | H00 Hordeolum and chalazion                                        |                  |
| <b>MC5</b><br>30,315 | 15.9 | 2.9 | I30-I52:Other forms of heart disease                                                  | 6.9 | 43.7 | I45 Other conduction disorders                                     | 0.77 (0.73-0.82) |
|                      |      |     | I20-I25:Ischaemic heart diseases                                                      | 5.0 | 31.0 | I25 Chronic ischaemic heart disease                                |                  |
|                      |      |     | I70-I79:Diseases of arteries, arterioles and capillaries                              | 2.4 | 15.2 | I73 Other peripheral vascular diseases                             |                  |
|                      |      |     | I60-I69:Cerebrovascular diseases                                                      | 1.8 | 11.4 | I64 Stroke, not specified as haemorrhage or infarction             |                  |
|                      |      |     | H30-H36:Disorders of choroid and retina                                               | 1.7 | 11.0 | H36 Retinal disorders in diseases classified elsewhere             |                  |
|                      |      |     | N17-N19:Renal failure                                                                 | 1.5 | 9.2  | N18 Chronic renal failure                                          |                  |
| <b>MC6</b><br>29,907 | 15.6 | 1.5 | M05-M14:Inflammatory polyarthropathies                                                | 5.4 | 34.5 | M10 Gout                                                           | 0.66 (0.60-0.72) |
|                      |      |     | S80-S89:Injuries to the knee and lower leg                                            | 3.2 | 20.7 | S83 Dislocation, sprain and strain of joints and ligaments of knee |                  |

|                      |      |     |                                                                     |     |      |                                                                                    |                  |
|----------------------|------|-----|---------------------------------------------------------------------|-----|------|------------------------------------------------------------------------------------|------------------|
|                      |      |     | L40-L45: Papulosquamous disorders                                   | 3.2 | 20.5 | L40 Psoriasis                                                                      |                  |
|                      |      |     | G50-G59: Nerve, nerve root and plexus disorders                     | 2.7 | 17.4 | G56 Mononeuropathies of upper limb                                                 |                  |
|                      |      |     | M65-M68: Disorders of synovium and tendon                           | 2.6 | 16.8 | M65 Synovitis and tenosynovitis                                                    |                  |
| <b>MC7</b><br>19,313 | 10.1 | 0.9 | K70-K77: Diseases of liver                                          | 5.2 | 51.9 | K76 Other diseases of liver                                                        | 1.00             |
|                      |      |     | B15-B19: Viral hepatitis                                            | 3.2 | 32.0 | B18 Chronic viral hepatitis                                                        |                  |
|                      |      |     | K80-K87: Disorders of gallbladder, biliary tract and pancreas       | 2.6 | 25.8 | K80 Cholelithiasis                                                                 |                  |
| <b>MC8</b><br>19,160 | 10.0 | 0.7 | T08-T14: Injuries to unspecified part of trunk, limb or body region | 4.1 | 41.0 | T14 Injury of unspecified body region                                              | 0.80 (0.75-0.86) |
|                      |      |     | L50-L54: Urticaria and erythema                                     | 2.1 | 20.8 | L50 Urticaria                                                                      |                  |
|                      |      |     | S60-S69: Injuries to the wrist and hand                             | 1.9 | 18.5 | S61 Open wound of wrist and hand                                                   |                  |
|                      |      |     | S90-S99: Injuries to the ankle and foot                             | 1.4 | 13.9 | S93 Dislocation, sprain and strain of joints and ligaments at ankle and foot level |                  |
|                      |      |     | S00-S09: Injuries to the head                                       | 1.3 | 13.3 | S01 Open wound of head                                                             |                  |
| <b>MC9</b><br>13,752 | 7.2  | 0.3 | E00-E07: Disorders of thyroid gland                                 | 2.4 | 32.8 | E03 Other hypothyroidism                                                           | 0.97 (0.96-0.98) |
|                      |      |     | K50-K52: Noninfective enteritis and colitis                         | 1.7 | 24.1 | K52 Other non-infective gastro-enteritis and colitis                               |                  |
|                      |      |     | D50-D53: Nutritional anaemias                                       | 1.2 | 16.3 | D50 Iron deficiency anaemia                                                        |                  |
|                      |      |     | Q38-Q45: Other congenital malformations of the digestive system     | 1.2 | 16.2 | Q40 Other congenital malformations of upper alimentary tract                       |                  |
|                      |      |     | D70-D77: Other diseases of blood and blood-forming organs           | 1.1 | 15.3 | D72 Other disorders of white blood cells                                           |                  |
| <b>MC10</b>          | 7.1  | 0.5 | J20-J22: Other acute lower                                          | 2.6 | 37.2 | J20 Acute bronchitis                                                               | 0.86 (0.82-0.91) |

|                       |     |     |                                                                        |     |      |                                                                 |                  |
|-----------------------|-----|-----|------------------------------------------------------------------------|-----|------|-----------------------------------------------------------------|------------------|
| 13,490                |     |     | respiratory infections                                                 |     |      |                                                                 |                  |
|                       |     |     | A00-A09: Intestinal infectious diseases                                | 2.4 | 34.2 | A09 Diarrhoea and gastroenteritis of presumed infectious origin |                  |
|                       |     |     | J09-J18: Influenza and pneumonia                                       | 1.6 | 22.0 | J11 Influenza, virus not identified                             |                  |
|                       |     |     | B25-B34: Other viral diseases                                          | 1.0 | 14.6 | B34 Viral infection of unspecified site                         |                  |
| <b>MC11</b><br>13,434 | 7.0 | 0.4 | H60-H62: Diseases of external ear                                      | 3.9 | 55.3 | H61 Other disorders of external ear                             | 0.88 (0.85-0.92) |
|                       |     |     | H65-H75: Diseases of middle ear and mastoid                            | 2.1 | 30.5 | H65 Nonsuppurative otitis media                                 |                  |
|                       |     |     | H80-H83: Diseases of inner ear                                         | 1.4 | 19.9 | H81 Disorders of vestibular function                            |                  |
| <b>MC12</b><br>10,952 | 5.7 | 0.1 | N20-N23: Urolithiasis                                                  | 4.3 | 75.5 | N20 Calculus of kidney and ureter                               | 0.99 (0.98-1.00) |
|                       |     |     | N30-N39: Other diseases of urinary system                              | 1.6 | 27.1 | N39 Other disorders of urinary system                           |                  |
| <b>MC13</b><br>8,794  | 4.6 | 0.3 | M45-M49: Spondylopathies                                               | 3.1 | 66.7 | M47 Spondylosis                                                 | 0.99 (0.95-1.00) |
|                       |     |     | M40-M43: Deforming dorsopathies                                        | 1.8 | 38.9 | M41 Scoliosis                                                   |                  |
| <b>MC14</b><br>7,444  | 3.9 | 0.2 | H40-H42: Glaucoma                                                      | 2.3 | 59.6 | H40 Glaucoma                                                    | 0.91 (0.88-0.95) |
|                       |     |     | H25-H28: Disorders of lens                                             | 1.8 | 45.4 | H25 Senile cataract                                             |                  |
| <b>MC15</b><br>6,161  | 3.2 | 0.0 | T51-T65: Toxic effects of substances chiefly nonmedicinal as to source | 2.1 | 65.8 | T65 Toxic effect of other and unspecified substances            | 0.90 (0.87-0.93) |
|                       |     |     | F20-F29: Schizophrenia, schizotypal and delusional disorders           | 1.1 | 35.3 | F20 Schizophrenia                                               |                  |

\*\*Approximately unbiased (AU) probability-value

**Appendix 6.** Factors in women aged 45-64 years (n= 217,823).

| Factorial order number, n | Prevalence 1, %* | Prevalence 2, %† | Blocks of diagnoses                                      | Prevalence in group, % | Prevalence in factor, % | Variance proportion, % | Cumulative Variance proportion, % |
|---------------------------|------------------|------------------|----------------------------------------------------------|------------------------|-------------------------|------------------------|-----------------------------------|
| <b>WF1^</b><br>130,072    | 59.7             | 25.4             | M50-M54:Other dorsopathies                               | 35.8                   | 59.9                    | 10.6                   | 69.1                              |
|                           |                  |                  | M70-M79:Other soft tissue disorders                      | 27.0                   | 45.2                    |                        |                                   |
|                           |                  |                  | M15-M19:Arthrosis                                        | 15.7                   | 26.2                    |                        |                                   |
|                           |                  |                  | G50-G59:Nerve, nerve root and plexus disorders           | 8.5                    | 14.3                    |                        |                                   |
|                           |                  |                  | M45-M49:Spondylopathies                                  | 4.3                    | 7.3                     |                        |                                   |
|                           |                  |                  | M40-M43:Deforming dorsopathies                           | 3.8                    | 6.4                     |                        |                                   |
| <b>WF2</b><br>82,301      | 37.8             | 12.0             | I10-I15:Hypertensive diseases                            | 25.6                   | 67.6                    | 7.0                    | 84.5                              |
|                           |                  |                  | E65-E68:Obesity and other hyperalimination               | 19.0                   | 50.2                    |                        |                                   |
|                           |                  |                  | E10-E14:Diabetes mellitus                                | 7.7                    | 20.3                    |                        |                                   |
| <b>WF3</b><br>71,436      | 32.8             | 8.1              | I10-I15:Hypertensive diseases                            | 25.6                   | 78.0                    | 20.2                   | 58.6                              |
|                           |                  |                  | E10-E14:Diabetes mellitus                                | 7.7                    | 23.4                    |                        |                                   |
|                           |                  |                  | I30-I52:Other forms of heart disease                     | 4.4                    | 13.3                    |                        |                                   |
|                           |                  |                  | H25-H28:Disorders of lens                                | 1.7                    | 5.3                     |                        |                                   |
|                           |                  |                  | H30-H36:Disorders of choroid and retina                  | 1.2                    | 3.6                     |                        |                                   |
|                           |                  |                  | I70-I79:Diseases of arteries, arterioles and capillaries | 1.1                    | 3.2                     |                        |                                   |
|                           |                  |                  | I20-I25:Ischaemic heart diseases                         | 1.0                    | 3.1                     |                        |                                   |
| <b>WF4</b><br>60,027      | 27.6             | 5.9              | J00-J06:Acute upper respiratory infections               | 12.6                   | 45.8                    | 38.3                   | 38.3                              |
|                           |                  |                  | N30-N39:Other diseases of urinary system                 | 5.9                    | 21.3                    |                        |                                   |
|                           |                  |                  | H60-H62:Diseases of external ear                         | 3.6                    | 13.1                    |                        |                                   |
|                           |                  |                  | J20-J22:Other acute lower respiratory infections         | 3.4                    | 12.2                    |                        |                                   |
|                           |                  |                  | A00-A09:Intestinal infectious diseases                   | 2.7                    | 10.0                    |                        |                                   |
|                           |                  |                  | H65-H75:Diseases of middle ear and mastoid               | 2.5                    | 9.2                     |                        |                                   |

|                      |      |     |                                                                            |      |       |     |       |
|----------------------|------|-----|----------------------------------------------------------------------------|------|-------|-----|-------|
|                      |      |     | J09-J18:Influenza and pneumonia                                            | 1.7  | 6.1   |     |       |
|                      |      |     | B25-B34:Other viral diseases                                               | 1.3  | 4.8   |     |       |
|                      |      |     | M60-M63:Disorders of muscles                                               | 1.2  | 4.4   |     |       |
| <b>WF5</b><br>56,671 | 26.0 | 5.3 | L20-L30:Dermatitis and eczema                                              | 9.3  | 35.7  | 8.4 | 77.5  |
|                      |      |     | B35-B49:Mycoses                                                            | 5.7  | 22.1  |     |       |
|                      |      |     | L60-L75:Disorders of skin appendages                                       | 4.8  | 18.3  |     |       |
|                      |      |     | H53-H54:Visual disturbances and blindness                                  | 4.4  | 16.9  |     |       |
|                      |      |     | H10-H13:Disorders of conjunctiva                                           | 3.8  | 14.6  |     |       |
|                      |      |     | L80-L99:Other disorders of the skin and subcutaneous tissue                | 3.3  | 12.8  |     |       |
|                      |      |     | H55-H59:Other disorders of eye and adnexa                                  | 1.2  | 4.7   |     |       |
| <b>WF6</b><br>46,391 | 21.3 | 3.8 | K20-K31:Diseases of oesophagus, stomach and duodenum                       | 11.4 | 53.6  | 5.9 | 90.4  |
|                      |      |     | K40-K46:Hernia                                                             | 5.7  | 26.7  |     |       |
|                      |      |     | K80-K87:Disorders of gallbladder, biliary tract and pancreas               | 4.0  | 18.8  |     |       |
|                      |      |     | K70-K77:Diseases of liver                                                  | 2.9  | 13.8  |     |       |
|                      |      |     | Q38-Q45:Other congenital malformations of the digestive system             | 1.5  | 7.1   |     |       |
| <b>WF7</b><br>41,492 | 19.0 | 0.6 | M80-M85:Disorders of bone density and structure                            | 11.3 | 59.5  | 5.1 | 95.5  |
|                      |      |     | D50-D53:Nutritional anaemias                                               | 8.3  | 43.5  |     |       |
| <b>WF8</b><br>40,619 | 18.6 | 0.0 | F10-F19:Mental and behavioural disorders due to psychoactive substance use | 18.6 | 100.0 | 4.3 | 99.8  |
| <b>WF9</b><br>23,729 | 10.9 | 0.6 | J40-J47:Chronic lower respiratory diseases                                 | 8.2  | 74.9  | 4.1 | 103.9 |
|                      |      |     | J20-J22:Other acute lower respiratory infections                           | 3.4  | 30.8  |     |       |

\*Individuals from  $\geq 1$  diagnosis in the factor/ † Individuals from with  $\geq 2$  diagnosis in the factor

^ Abbreviation of sex, method and number (WF1: Women Factor 1)

## Appendix 7. Factors in men aged 45-64 years (n= 191,171).

| Factorial order number, n         | Prevalence 1, %* | Prevalence 2, %† | Blocks of diagnoses                                                        | Prevalence in age, % | Prevalence in factor, % | Variance proportion, % | Cumulative Variance proportion, % |
|-----------------------------------|------------------|------------------|----------------------------------------------------------------------------|----------------------|-------------------------|------------------------|-----------------------------------|
| <b>MF1<sup>^</sup></b><br>118,037 | 61.7             | 26.1             | E70-E90:Metabolic disorders                                                | 42.2                 | 68.3                    | 5.1                    | 94.8                              |
|                                   |                  |                  | I10-I15:Hypertensive diseases                                              | 32.6                 | 52.7                    |                        |                                   |
|                                   |                  |                  | E65-E68:Obesity and other hyperalimentation                                | 14.6                 | 23.6                    |                        |                                   |
|                                   |                  |                  | M05-M14:Inflammatory polyarthropathies                                     | 5.4                  | 8.7                     |                        |                                   |
| <b>MF2</b><br>75,315              | 39.4             | 8.7              | I10-I15:Hypertensive diseases                                              | 32.5                 | 82.6                    | 28.5                   | 28.5                              |
|                                   |                  |                  | I30-I52:Other forms of heart disease                                       | 6.9                  | 17.6                    |                        |                                   |
|                                   |                  |                  | I20-I25:Ischaemic heart diseases                                           | 5.0                  | 12.6                    |                        |                                   |
|                                   |                  |                  | I70-I79:Diseases of arteries, arterioles and capillaries                   | 2.4                  | 6.1                     |                        |                                   |
|                                   |                  |                  | I60-I69:Cerebrovascular diseases                                           | 1.8                  | 4.6                     |                        |                                   |
|                                   |                  |                  | N17-N19:Renal failure                                                      | 1.5                  | 3.7                     |                        |                                   |
| <b>MF3</b><br>73,638              | 38.5             | 4.4              | F10-F19:Mental and behavioural disorders due to psychoactive substance use | 33.6                 | 87.2                    | 5.3                    | 89.6                              |
|                                   |                  |                  | K70-K77:Diseases of liver                                                  | 5.2                  | 13.6                    |                        |                                   |
|                                   |                  |                  | B15-B19:Viral hepatitis                                                    | 3.2                  | 8.4                     |                        |                                   |
|                                   |                  |                  | F20-F29:Schizophrenia, schizotypal and delusional disorders                | 1.1                  | 2.9                     |                        |                                   |
| <b>MF4</b><br>66,303              | 34.7             | 5.1              | M50-M54:Other dorsopathies                                                 | 27.8                 | 80.2                    | 7.3                    | 77.8                              |
|                                   |                  |                  | M15-M19:Arthrosis                                                          | 7.7                  | 22.2                    |                        |                                   |
|                                   |                  |                  | M45-M49:Spondylopathies                                                    | 3.1                  | 8.8                     |                        |                                   |
|                                   |                  |                  | M40-M43:Deforming dorsopathies                                             | 1.8                  | 5.2                     |                        |                                   |
| <b>MF5</b><br>34,903              | 18.3             | 2.5              | L20-L30:Dermatitis and eczema                                              | 7.5                  | 41.3                    | 22.2                   | 50.7                              |
|                                   |                  |                  | B35-B49:Mycoses                                                            | 4.1                  | 22.5                    |                        |                                   |
|                                   |                  |                  | H53-H54:Visual disturbances and                                            | 3.9                  | 21.3                    |                        |                                   |



|                      |      |     |                                                                    |      |       |      |       |
|----------------------|------|-----|--------------------------------------------------------------------|------|-------|------|-------|
|                      |      |     | blindness                                                          |      |       |      |       |
|                      |      |     | H10-H13:Disorders of conjunctiva                                   | 3.0  | 16.6  |      |       |
|                      |      |     | L80-L99:Other disorders of the skin and subcutaneous tissue        | 2.5  | 13.8  |      |       |
| <b>MF6</b><br>27,697 | 14.5 | 1.8 | J00-J06:Acute upper respiratory infections                         | 8.9  | 61.3  | 10.4 | 61.0  |
|                      |      |     | J20-J22:Other acute lower respiratory infections                   | 2.6  | 18.1  |      |       |
|                      |      |     | A00-A09:Intestinal infectious diseases                             | 2.4  | 16.7  |      |       |
|                      |      |     | J09-J18:Influenza and pneumonia                                    | 1.6  | 10.7  |      |       |
|                      |      |     | B25-B34:Other viral diseases                                       | 1.0  | 7.1   |      |       |
| <b>MF7</b><br>33,568 | 17.6 | 2.2 | E10-E14:Diabetes mellitus                                          | 14.2 | 80.8  | 9.5  | 70.5  |
|                      |      |     | H40-H42:Glaucoma                                                   | 2.3  | 13.2  |      |       |
|                      |      |     | H25-H28:Disorders of lens                                          | 1.8  | 10.1  |      |       |
|                      |      |     | H30-H36:Disorders of choroid and retina                            | 1.7  | 10.0  |      |       |
| <b>MF8</b><br>25,121 | 13.1 | 0.7 | K20-K31:Diseases of oesophagus, stomach and duodenum               | 11.5 | 87.8  | 6.5  | 84.3  |
|                      |      |     | D50-D53:Nutritional anaemias                                       | 1.2  | 8.9   |      |       |
|                      |      |     | Q38-Q45:Other congenital malformations of the digestive system     | 1.2  | 8.9   |      |       |
| <b>MF9</b><br>15,974 | 8.4  | 0.4 | T08-T14:Injuries to unspecified part of trunk, limb or body region | 4.1  | 49.2  | 5.0  | 99.8  |
|                      |      |     | S80-S89:Injuries to the knee and lower leg                         | 3.3  | 38.7  |      |       |
|                      |      |     | S90-S99:Injuries to the ankle and foot                             | 1.4  | 16.7  |      |       |
| <b>MF10</b><br>8,271 | 4.3  | 0.0 | N20-N23:Urolithiasis                                               | 4.3  | 100.0 | 3.9  | 103.7 |

\*Individuals from  $\geq 1$  diagnosis in the factor/ † Individuals from with  $\geq 2$  diagnosis in the factor

^ Abbreviation of sex, method and number (MF1: Men Factor 1)

**STROBE 2007 (v4) Statement—Checklist of items that should be included in reports of *cross-sectional studies***

| Section/Topic                | Item # | Recommendation                                                                                                                                                                       | Reported on page # |
|------------------------------|--------|--------------------------------------------------------------------------------------------------------------------------------------------------------------------------------------|--------------------|
| <b>Title and abstract</b>    | 1      | (a) Indicate the study's design with a commonly used term in the title or the abstract                                                                                               | 1                  |
|                              |        | (b) Provide in the abstract an informative and balanced summary of what was done and what was found                                                                                  | 2                  |
| <b>Introduction</b>          |        |                                                                                                                                                                                      |                    |
| Background/rationale         | 2      | Explain the scientific background and rationale for the investigation being reported                                                                                                 | 4                  |
| Objectives                   | 3      | State specific objectives, including any prespecified hypotheses                                                                                                                     | 5                  |
| <b>Methods</b>               |        |                                                                                                                                                                                      |                    |
| Study design                 | 4      | Present key elements of study design early in the paper                                                                                                                              | 5                  |
| Setting                      | 5      | Describe the setting, locations, and relevant dates, including periods of recruitment, exposure, follow-up, and data collection                                                      | 5                  |
| Participants                 | 6      | (a) Give the eligibility criteria, and the sources and methods of selection of participants                                                                                          | 5                  |
| Variables                    | 7      | Clearly define all outcomes, exposures, predictors, potential confounders, and effect modifiers. Give diagnostic criteria, if applicable                                             | 6                  |
| Data sources/<br>measurement | 8*     | For each variable of interest, give sources of data and details of methods of assessment (measurement). Describe comparability of assessment methods if there is more than one group | 6-8                |
| Bias                         | 9      | Describe any efforts to address potential sources of bias                                                                                                                            | -                  |
| Study size                   | 10     | Explain how the study size was arrived at                                                                                                                                            | 5                  |
| Quantitative variables       | 11     | Explain how quantitative variables were handled in the analyses. If applicable, describe which groupings were chosen and why                                                         |                    |
| Statistical methods          | 12     | (a) Describe all statistical methods, including those used to control for confounding                                                                                                | 6                  |
|                              |        | (b) Describe any methods used to examine subgroups and interactions                                                                                                                  | 6                  |
|                              |        | (c) Explain how missing data were addressed                                                                                                                                          | 6-9                |
|                              |        | (d) If applicable, describe analytical methods taking account of sampling strategy                                                                                                   | 6-9                |
|                              |        | (e) Describe any sensitivity analyses                                                                                                                                                | 6-9                |
| <b>Results</b>               |        |                                                                                                                                                                                      |                    |

|                          |     |                                                                                                                                                                                                              |                               |
|--------------------------|-----|--------------------------------------------------------------------------------------------------------------------------------------------------------------------------------------------------------------|-------------------------------|
| Participants             | 13* | (a) Report numbers of individuals at each stage of study—eg numbers potentially eligible, examined for eligibility, confirmed eligible, included in the study, completing follow-up, and analysed            | 10                            |
|                          |     | (b) Give reasons for non-participation at each stage                                                                                                                                                         | 10                            |
|                          |     | (c) Consider use of a flow diagram                                                                                                                                                                           | Supplementary File Appendix 1 |
| Descriptive data         | 14* | (a) Give characteristics of study participants (eg demographic, clinical, social) and information on exposures and potential confounders                                                                     | Table 1                       |
|                          |     | (b) Indicate number of participants with missing data for each variable of interest                                                                                                                          | Tables                        |
| Outcome data             | 15* | Report numbers of outcome events or summary measures                                                                                                                                                         | Tables                        |
| Main results             | 16  | (a) Give unadjusted estimates and, if applicable, confounder-adjusted estimates and their precision (eg, 95% confidence interval). Make clear which confounders were adjusted for and why they were included | Tables 2 and 3.               |
|                          |     | (b) Report category boundaries when continuous variables were categorized                                                                                                                                    | -                             |
|                          |     | (c) If relevant, consider translating estimates of relative risk into absolute risk for a meaningful time period                                                                                             | -                             |
| Other analyses           | 17  | Report other analyses done—eg analyses of subgroups and interactions, and sensitivity analyses                                                                                                               | -                             |
| <b>Discussion</b>        |     |                                                                                                                                                                                                              |                               |
| Key results              | 18  | Summarise key results with reference to study objectives                                                                                                                                                     | 23                            |
| Limitations              | 19  | Discuss limitations of the study, taking into account sources of potential bias or imprecision. Discuss both direction and magnitude of any potential bias                                                   | 20-21                         |
| Interpretation           | 20  | Give a cautious overall interpretation of results considering objectives, limitations, multiplicity of analyses, results from similar studies, and other relevant evidence                                   | 19                            |
| Generalisability         | 21  | Discuss the generalisability (external validity) of the study results                                                                                                                                        | 20                            |
| <b>Other information</b> |     |                                                                                                                                                                                                              |                               |
| Funding                  | 22  | Give the source of funding and the role of the funders for the present study and, if applicable, for the original study on which the present article is based                                                | 23                            |

\*Give information separately for cases and controls in case-control studies and, if applicable, for exposed and unexposed groups in cohort and cross-sectional studies.

**Note:** An Explanation and Elaboration article discusses each checklist item and gives methodological background and published examples of transparent reporting. The STROBE checklist is best used in conjunction with this article (freely available on the Web sites of PLoS Medicine at <http://www.plosmedicine.org/>, Annals of Internal Medicine at <http://www.annals.org/>, and Epidemiology at <http://www.epidem.com/>). Information on the STROBE Initiative is available at [www.strobe-statement.org](http://www.strobe-statement.org).

# BMJ Open

## Comparative analysis of methods for identifying multimorbidity patterns: A study of 'real world' data.

|                                 |                                                                                                                                                                                                                                                                                                                                                                                                                                                                                                                                                                                                                                                                                                                                                                                                                                                                                                                                                                                                                                                                |
|---------------------------------|----------------------------------------------------------------------------------------------------------------------------------------------------------------------------------------------------------------------------------------------------------------------------------------------------------------------------------------------------------------------------------------------------------------------------------------------------------------------------------------------------------------------------------------------------------------------------------------------------------------------------------------------------------------------------------------------------------------------------------------------------------------------------------------------------------------------------------------------------------------------------------------------------------------------------------------------------------------------------------------------------------------------------------------------------------------|
| Journal:                        | <i>BMJ Open</i>                                                                                                                                                                                                                                                                                                                                                                                                                                                                                                                                                                                                                                                                                                                                                                                                                                                                                                                                                                                                                                                |
| Manuscript ID                   | bmjopen-2017-018986.R2                                                                                                                                                                                                                                                                                                                                                                                                                                                                                                                                                                                                                                                                                                                                                                                                                                                                                                                                                                                                                                         |
| Article Type:                   | Research                                                                                                                                                                                                                                                                                                                                                                                                                                                                                                                                                                                                                                                                                                                                                                                                                                                                                                                                                                                                                                                       |
| Date Submitted by the Author:   | 16-Jan-2018                                                                                                                                                                                                                                                                                                                                                                                                                                                                                                                                                                                                                                                                                                                                                                                                                                                                                                                                                                                                                                                    |
| Complete List of Authors:       | Roso-Llorach, Albert; Institut Universitari d'Investigació en Atenció Primària Jordi Gol (IDIAP Jordi Gol), ; Universitat Autònoma de Barcelona, Violan-Fors, Concepción; Institut Universitari d'Investigació en Atenció Primària Jordi Gol (IDIAP Jordi Gol); Universitat Autònoma de Barcelona Foguet-Boreu, Quintí; Institut Universitari d'Investigació en Atenció Primària Jordi Gol (IDIAP Jordi Gol) Universitat Autònoma de Barcelona; Universitat Autònoma de Barcelona Rodriguez-Blanco, Teresa; Institut Universitari d'Investigació en Atenció Primària Jordi Gol (IDIAP Jordi Gol); Universitat Autònoma de Barcelona Pons-Vigués, Mariona; Institut Universitari d'Investigació en Atenció Primària Jordi Gol (IDIAP Jordi Gol); Universitat Autònoma de Barcelona Pujol-Ribera, Enriqueta; Institut Universitari d'Investigació en Atenció Primària (IDIAP-Jordi Gol); Universitat Autònoma de Barcelona Valderas, Jose; University of Exeter Medical School, Health Services & Policy Research Group, Academic Collaboration for Primary Care |
| <b>Primary Subject Heading</b>: | Epidemiology                                                                                                                                                                                                                                                                                                                                                                                                                                                                                                                                                                                                                                                                                                                                                                                                                                                                                                                                                                                                                                                   |
| Secondary Subject Heading:      | Research methods, General practice / Family practice, Anaesthesia                                                                                                                                                                                                                                                                                                                                                                                                                                                                                                                                                                                                                                                                                                                                                                                                                                                                                                                                                                                              |
| Keywords:                       | Multimorbidity, Cluster analysis, Factor analysis, Primary health care, Electronic health records, diseases                                                                                                                                                                                                                                                                                                                                                                                                                                                                                                                                                                                                                                                                                                                                                                                                                                                                                                                                                    |
|                                 |                                                                                                                                                                                                                                                                                                                                                                                                                                                                                                                                                                                                                                                                                                                                                                                                                                                                                                                                                                                                                                                                |

SCHOLARONE™  
Manuscripts

## Comparative analysis of methods for identifying multimorbidity patterns: A study of 'real world' data.

1. Albert Roso-Llorach. 1. Institut Universitari d'Investigació en Atenció Primària Jordi Gol (IDIAP Jordi Gol), Gran Via Corts Catalanes, 587 àtic, 08007 Barcelona, Spain. 2. Universitat Autònoma de Barcelona, Bellaterra (Cerdanyola del Vallès), Spain.

E-mail: [aroso@idiapjgol.org](mailto:aroso@idiapjgol.org)

2. Concepción Violán. 1. Institut Universitari d'Investigació en Atenció Primària Jordi Gol (IDIAP Jordi Gol), Gran Via Corts Catalanes, 587 àtic, 08007 Barcelona, Spain. 2. Universitat Autònoma de Barcelona, Bellaterra (Cerdanyola del Vallès), Spain.

E-mail: [cviolan@idiapjgol.org](mailto:cviolan@idiapjgol.org)

3. Quintí Foguet-Boreu. 1. Institut Universitari d'Investigació en Atenció Primària Jordi Gol (IDIAP Jordi Gol), Gran Via Corts Catalanes, 587 àtic, 08007 Barcelona, Spain. 2. Universitat Autònoma de Barcelona, Bellaterra (Cerdanyola del Vallès), Spain. 3. Department of Psychiatry, Vic University Hospital. Francesc Pla el Vigatà, 1, 08500 Vic, Barcelona, Catalonia.

E-mail: [42292qfb@comb.cat](mailto:42292qfb@comb.cat)

4. Teresa Rodriguez-Blanco. Institut Universitari d'Investigació en Atenció Primària Jordi Gol (IDIAP Jordi Gol). Universitat Autònoma de Barcelona, Gran Via Corts Catalanes, 587 àtic, 08007 Barcelona, Spain. E-mail: [trodriquez@idiapjgol.org](mailto:trodriquez@idiapjgol.org)

5. Mariona Pons-Vigués. 1. Institut Universitari d'Investigació en Atenció Primària Jordi Gol (IDIAP Jordi Gol), Gran Via Corts Catalanes, 587 àtic, 08007 Barcelona, Spain. 2. Universitat Autònoma de Barcelona, Bellaterra (Cerdanyola del Vallès), Spain. 3. Faculty of Nursing, University of Girona, Emili Grahit, 77, 17071 Girona, Spain.

E-mail: [mponsv@idiapjgol.info](mailto:mponsv@idiapjgol.info)

6. Enriqueta Pujol-Ribera. 1. Institut Universitari d'Investigació en Atenció Primària Jordi Gol (IDIAP Jordi Gol), Gran Via Corts Catalanes, 587 àtic, 08007 Barcelona, Spain. 2. Universitat Autònoma de Barcelona, Bellaterra (Cerdanyola del Vallès), Spain. 3. Faculty of Nursing, University of Girona, Emili Grahit, 77, 17071 Girona, Spain. E-mail: [epujol@idiapjgol.org](mailto:epujol@idiapjgol.org)

7. Jose M Valderas. Health Services & Policy Research Group, Academic Collaboration for Primary Care, University of Exeter Medical School, Exeter, EX1 2LU, United Kingdom.

E-mail: [J.M.Valderas@exeter.ac.uk](mailto:J.M.Valderas@exeter.ac.uk)

**Corresponding author:** Albert Roso-Llorach. IDIAP Jordi Gol  
Gran Via Corts Catalanes, 587 àtic.08007 Barcelona. Spain.  
Telephone: 0034 93 482 41 24. FAX: 0034 93 482 41 74.  
Web page: [www.idiapjgol.org](http://www.idiapjgol.org).E-mail: [aroso@idiapjgol.org](mailto:aroso@idiapjgol.org)

**Word count:** 4088

## Comparative analysis of methods for identifying multimorbidity patterns: A study of 'real world' data.

### ABSTRACT

**Objective** The aim was to compare multimorbidity patterns identified with the two most commonly used methods: hierarchical cluster analysis (HCA) and exploratory factor analysis (EFA) in a large primary care database. Specific objectives were 1) to determine whether choice of method affects the composition of these patterns and 2) to consider the potential application of each method in the clinical setting.

**Design** Cross-sectional study. Diagnoses were based on the 263 corresponding blocks of the International Classification of Diseases (ICD-10). Multimorbidity patterns were identified using HCA and EFA. Analysis was stratified by sex, and results compared for each method.

**Setting and participants** Electronic health records for 408,994 patients with multimorbidity aged 45-64 years in 274 primary health care teams from 2010 in Catalonia, Spain.

**Results** HCA identified 53 clusters for women, with just 12 clusters including at least 2 diagnoses, and 15 clusters for men, all of them including at least 2 diagnoses. EFA showed 9 factors for women and 10 factors for men. We observed differences by sex and method of analysis, although some patterns were consistent. Three combinations of diseases were observed consistently across sex groups and across both methods: hypertension and obesity, spondylopathies and deforming dorsopathies, and dermatitis eczema and mycosis.

**Conclusions** This study showed that multimorbidity patterns vary depending on the method of analysis used (HCA vs EFA) and provided new evidence about the known limitations of attempts to compare multimorbidity patterns in Real World Data studies. We found that EFA was useful in describing comorbidity relationships and HCA could be useful for in-depth study of multimorbidity. Our results suggest possible applications for each of these methods in clinical and research settings and add information about some aspects that must be considered in standardization of future studies: spectrum of diseases, data utilization, and methods of analysis.

**Keywords:** Multimorbidity, Cluster analysis, Factor analysis, Primary health care, Electronic health records, diseases

### Strengths and limitations of this study

- This one of the first studies to compare the two methodologies most commonly used to obtain patterns of multimorbidity, Hierarchical Cluster Analysis and Exploratory Factor Analysis.
- The dual analysis was performed in a large, high-quality database of primary care electronic health records that have been shown to be representative of a much larger population, stratified by sex.
- Internal validation with bootstrap methods provided more robust evidence for the cluster analysis.
- The agglomerative hierarchical clustering forces every unit into a single cluster, is exploratory in nature and different clustering algorithms may produce different results.
- The study is cross-sectional and further studies are needed to analyze the patterns that develop longitudinally as individual patients acquire subsequent comorbidities.

## INTRODUCTION

The reliable identification of patterns of multimorbidity is a critical step in developing health care services sensitive to the health needs of these patients.[1] Recent reviews of multimorbidity patterns have shown that individual studies differ widely in their design and choice of epidemiological and statistical methods, including sampling frameworks and selection criteria, coding systems, eligible diseases, and definition of disease clustering patterns.[2–4] These studies highlight the lack of consensus to measure patterns of comorbidity and multimorbidity. In recent years, the number of studies based on real-world data (RWD) [5] has increased significantly, which makes it even more difficult to establish a consensus on how to measure comorbidity and multimorbidity patterns. Although much more information is available, the different databases may not be comparable, making it difficult to arrive at observations and draw firm conclusions. It also limits our ability to compare analyses using RWD and to evaluate whether one approach may be better suited to the purpose. Therefore, it is difficult to identify multimorbidity patterns and provide adequate health services according to the population needs.

The most frequent methods used to date have been hierarchical cluster analysis (HCA) and exploratory factor analysis (EFA), which offer very different approaches and solutions.[2,3] Both are descriptive methods to identify association of diagnoses and determine patterns of multimorbidity. HCA obtains the patterns of multimorbidity from the dissimilarities between diseases, while EFA is based on correlations between diagnoses to identify the patterns. The HCA clusters tend to contain diagnoses that are similar to each other (in terms of Euclidean distances), but dissimilar from the diagnoses in other clusters; no diagnosis can be included in more than one cluster. In contrast, EFA along with confirmatory factor analysis are primarily used to test hypothesized relationships between observed measures and latent constructs. In



1  
2  
3 addition, EFA allows for inclusion of any diagnosis in multiple factors as they can present  
4  
5 significant correlations with more than one factor. [6-9]

6  
7 For all these reasons, the aim was to compare multimorbidity patterns identified with the two  
8  
9 most commonly used methods: hierarchical cluster analysis (HCA) and exploratory factor  
10  
11 analysis (EFA) in a large primary care database. Specific objectives were 1) to determine  
12  
13 whether choice of method affects the composition of these patterns and 2) to consider the  
14  
15 potential application of each method in the clinical setting.  
16  
17

## 18 **METHODS**

### 19 **Design, setting and study population**

20  
21  
22 A cross-sectional study was conducted in Catalonia (Spain), a Mediterranean region with  
23  
24 7,434,632 inhabitants, 81% of which live in urban municipalities (2010 census). The Spanish  
25  
26 National Health Service (NHS) provides universal coverage, financed mainly by tax revenue.  
27  
28 The Catalan Health Institute (CHI) manages primary health care teams (PHCTs) that serve  
29  
30 5,501,784 patients (274 PHCT), or 74% of the population; the remaining PHCTs are managed by  
31  
32 other providers. The CHI's Information System for the Development of Research in Primary  
33  
34 Care (SIDIAP) contains the coded clinical information recorded in electronic health records EHR  
35  
36 by its 274 PHCTs since 2006. A subset of records meeting the highest quality criteria for clinical  
37  
38 data (SIDIAP Q) includes 40% of the SIDIAP population (1,833,125 individuals), attended by the  
39  
40 1,365 general practitioners (GPs) whose data recording scores contain information on the  
41  
42 majority of the population of Catalonia, and is highly representative for the whole region in  
43  
44 terms of geography, age, gender and diseases.[10–12]  
45  
46  
47  
48  
49

50  
51 Prevalence of individual conditions varies with age and so does multimorbidity and their  
52  
53 patterns. In order to obtain a more homogenous sample in terms of multimorbidity, we  
54  
55  
56  
57  
58  
59

1  
2  
3 focussed on individuals aged 45 to 64 years.[13–16] We identified 408,944 individuals aged 45  
4  
5 to 64 years on 31 December 2010 with two or more diagnoses (Appendix 1).  
6  
7

### 8 **Coding and selection of diseases**

9  
10 Diseases are coded in SIDIAP using International Classification of Diseases version 10 (ICD-10).  
11  
12 For this study, we selected all active diagnoses recorded in EHR as of December 31, 2010,  
13  
14 except for R codes (symptoms, signs, and abnormal clinical and laboratory findings, not  
15  
16 elsewhere classified) and Z codes (factors influencing health status and contact with health  
17  
18 services).[17] Non-active diagnoses were excluded, based on the presence of an end date in  
19  
20 the EHR. These diagnoses cover a broad list of acute diseases for which the system  
21  
22 automatically assigns an end date (e.g., 60 days after the initial diagnosis).  
23  
24

25  
26 To facilitate management of the diagnostic information, the diagnoses were extracted using  
27  
28 the 263 blocks (disease categories) in the ICD-10 structure. These are homogeneous categories  
29  
30 of very closely related specific diagnoses. For example, Hypertensive diseases include Essential  
31  
32 (primary) hypertension, Hypertensive heart disease, Hypertensive renal disease, Hypertensive  
33  
34 heart and renal disease and Secondary hypertension. To obtain consistent and clinically  
35  
36 interpretable patterns of association, and to avoid spurious relationships that could bias the  
37  
38 results, we considered only diagnoses with greater than 1% prevalence in each sex. All patients  
39  
40 with multimorbidity (2 or more coexisting diagnoses recorded in the EHR on 31 December  
41  
42 2010) were included.  
43  
44

### 45 **Variables**

46  
47 The variables considered were: diagnosis (values: 1 for present, 0 for absent), number of  
48  
49 diseases (2, 3, 4, and 5 or more) and sex (women, men) were also recorded for each patient.  
50  
51

### 52 **Statistical analysis**

53  
54 Data access: Data was obtained from SIDIAP after the study was authorized. All the project's  
55  
56 authors could access the database. Cleaning methods: The analysis was limited to SIDIAP-Q, as  
57  
58

1  
2  
3 the sample was representative of the population.[10–12] No missing values were handled as  
4  
5 sex and age were recorded for all population. Wrong sex-specific diagnoses codes and  
6  
7 diagnoses with inconsistent dates were excluded. An individual with no disease diagnoses  
8  
9 record was considered as disease free.

10  
11  
12 Analyses were stratified by sex. Descriptive statistics were used to summarize overall  
13  
14 information. Categorical variables were expressed as frequencies (percentage) and continuous  
15  
16 as mean (standard deviation, SD) or median (interquartile range, IQR). Two sample test of  
17  
18 proportions and Mann-Whitney test were used to test differences by sex.

19  
20  
21 We identified disease patterns using two approaches: 1) hierarchical cluster analysis (HCA),  
22  
23 and 2) exploratory factor analysis (EFA). Clinical criteria were used to evaluate the consistency  
24  
25 and utility of the final HCA and EFA solutions, based on previously described patterns in the  
26  
27 literature and a consensus opinion drawn from the clinical experience of the research team (4  
28  
29 family physicians, 1 epidemiologist). Clusters and factors in these analyses were considered as  
30  
31 two sets of grouping solutions, which were then assigned to each individual patient. We  
32  
33 considered patients to be associated with a given grouping solution if they had  $\geq 1$  diagnoses in  
34  
35 that solution, allowing for the calculation of the prevalence of each solution in the sample.  
36  
37 Patients could be associated with more than one solution in the same set. We also calculated  
38  
39 prevalence, restricting the assignment of patients to those with  $\geq 2$  diagnoses in the same  
40  
41 solution.  
42  
43

#### 44 45 Hierarchical Cluster Analysis

46  
47 The HCA approach assigns diagnoses to groups or clusters, so that diagnoses in the same  
48  
49 cluster are more similar, based on a given measure, to one another than to diagnoses from  
50  
51 different clusters. The Jaccard coefficient was used to measure similarity. This coefficient  
52  
53 considers only the diagnoses that any two patients have and ignores the diagnoses that  
54  
55 neither of them has.[6] As we do not know a priori the number of clusters to retain from the  
56  
57  
58  
59  
60

1  
2  
3 data, we used agglomerative hierarchical methods to identify possible clustering solutions:  
4  
5 Average linkage, Ward, flexible beta and other methods with less bias, based on  
6  
7 nonparametric estimates, such as Single Linkage and Density Linkage. All but Ward and the  
8  
9 flexible beta methods successively chained the observations into one cluster. Therefore, the  
10  
11 Ward method, which minimizes the variance within clusters and produces clusters of similar  
12  
13 sizes, was chosen as the primary method based on dendrograms analysis.[6] Data were  
14  
15 randomly split into test and training datasets, equal in size and analysed separately. We ran  
16  
17 the Ward method on both samples. The semi-partial R<sup>2</sup>, Calinski-Harabasz pseudo-F- and  
18  
19 pseudo-T<sup>2</sup>-statistic criteria for different numbers of clusters were examined.[6] Clustering  
20  
21 solutions were compared between the test and training datasets, taking into account the  
22  
23 number of clusters, Adjusted Rand Index and clinical criteria. After checking algorithm stability,  
24  
25 Ward method was run on the full data set, applying the same criteria to different numbers of  
26  
27 clusters. Results were compared with flexible beta results, with beta values set at -0.25 and -  
28  
29 0.5. The criteria for selecting the number of clusters were the highest adjusted Rand index with  
30  
31 a high number of clusters and a high pseudo T<sup>2</sup> statistic.[6] To assess internal cluster quality,  
32  
33 we applied multiscale bootstrap resampling to obtain an approximately unbiased (AU)  
34  
35 probability. This probability ('p-value') is the proportion of bootstrapped samples that contain  
36  
37 the cluster; larger p-values indicate more support for the cluster.[18]

40  
41 Multidimensional scaling (MDS) considering two dimensions was used to discover the  
42  
43 underlying structure of distance measures between diseases in the cluster analysis. Essentially,  
44  
45 MDS assigns observations to specific locations in a conceptual space such that the distances  
46  
47 between points in the space match the given dissimilarities as closely as possible. We carried  
48  
49 out classical MDS using the distance matrix obtained in the cluster analysis that considered the  
50  
51 Jaccard coefficient as a dissimilarity measure. The conceptual map of the diseases  
52  
53 distinguishes between the intra-disease cluster and the inter-disease cluster. Taking into  
54  
55 account the final cluster's solution and the obtained groups, conceptual maps of the diseases  
56  
57

1  
2  
3 were created. For a better interpretation of the conceptual map, prevalence of the disease  
4  
5 was represented as the radius of the circle.[19]  
6

#### 7 8 Exploratory Factor Analysis

9  
10 EFA reduces the observed set of diagnoses to a smaller number of latent factors that account  
11  
12 for the correlations between them. As the study variables were dichotomous, the correlation  
13  
14 matrix between the diagnoses was computed using tetrachoric correlations. The factorability  
15  
16 of the matrix was tested using Bartlett Test of Sphericity and Kaiser-Meyer-Olkin (KMO)  
17  
18 Measure of Sampling Adequacy. The extraction of the initial solution was carried out using the  
19  
20 principal factors method with squared multiple correlations for the prior communality  
21  
22 estimates. The optimal number of extracted factors for the final solution was determined with  
23  
24 the Scree plot using the “elbow” rule and setting the percentage of variance equal to 100  
25  
26 percent. Factor loadings were analyzed to identify factor patterns. An oblique rotation,  
27  
28 Oblimin, was performed to clarify the factor pattern in order to better interpret the nature of  
29  
30 the factors, as we assumed that factors were allowed to be associated with each other. As a  
31  
32 rule of thumb, factor loadings greater than or equal to 0.30 in absolute value were considered  
33  
34 to be significant.[7]  
35  
36

#### 37 38 Comparing multimorbidity patterns

39  
40 We compared every cluster and factor solutions across sex groups agreement and the  
41  
42 diagnoses included in it.  
43  
44

45 We considered grouping solutions (HCA vs EFA) from different sets (women vs men) to have  
46  
47 the following degrees of similarity: a) perfect, when the solution included exactly the same  
48  
49 diseases as another solution in the other comparison group (sex or statistical approach); b)  
50  
51 partial, when the solution included a subset of diseases present in a solution in the other  
52  
53 comparison group; and c) none, when each and every disease in the solution was part of a  
54  
55 different solution in the other group and none was part of the same solution. These groups  
56  
57  
58  
59

were named using the abbreviation of sex, method and number (For example, MC1: Men Cluster 1)

We further extracted the common subsets of diseases within partially similar solutions, which together with completely similar solutions gave a comprehensive picture of overlapping cluster and factor analysis solutions.

The analyses were performed using SPSS for Windows, version 18 (SPSS Inc., Chicago, IL, USA), SAS 9.2 for Windows (SAS Institute Inc., Cary, NC, USA) and R version 3.1.2 (R Foundation for Statistical Computing, Vienna, Austria).

## RESULTS

Of 523,656 patients, 408,994 (78.1%) met the multimorbidity criteria; women had a higher multimorbidity prevalence than men (82.2% vs 73.9%, respectively;  $p < 0.001$ ) (Table 1). Both cluster and factor analyses included 79 diagnoses for women and 73 for men.

**Table 1.** Number of diseases, clusters, and factors identified in cluster and factorial analysis for patients 45-64 years-old, stratified by sex (N=523,656)

|                                            | Total, n (%)    | Women, n (%)    | Men, n (%)      |
|--------------------------------------------|-----------------|-----------------|-----------------|
| $\geq 2$ Diagnoses*                        | 408,994 (78.1%) | 217,823 (82.2%) | 191,171 (73.9%) |
| Number of diagnoses*                       |                 |                 |                 |
| 2                                          |                 | 26,106 (12.0%)  | 33,850 (17.7%)  |
| 3                                          |                 | 28,243 (13.0%)  | 33,515 (17.5%)  |
| 4                                          |                 | 28,274 (13.0%)  | 30,356 (15.9%)  |
| $\geq 5$                                   |                 | 135,200 (62.1%) | 93,450 (48.9%)  |
| Median number of diagnoses (IQR)**         |                 | 5 (4-8)         | 4 (3-7)         |
| Number of diagnoses included               |                 | 79              | 73              |
| Number of clusters                         |                 |                 |                 |
| Number of clusters with $\geq 2$ diagnoses |                 | 12              | 15              |
| Median of diagnoses per clusters (IQR)***  |                 | 2 (2-4)         | 5 (2.5-6)       |
| Number of factors                          |                 |                 |                 |
| Number of factors with $\geq 2$ diagnoses  |                 | 8               | 9               |
| Median of diagnoses per factors (IQR)***   |                 | 5.5 (2.75-7)    | 4 (4-5)         |

Abbreviations: IQR, Inter-quartile range.

\* Two sample test of proportions; all  $p$ -values  $< 0.001$

\*\* Mann-Whitney test;  $P < 0.001$

\*\*\*Median of clusters or factors with  $\geq 2$  diseases;  $P < 0.001$

## Hierarchical Cluster analysis

Using HCA with the Ward method, we obtained 53 clusters, with just 12 clusters grouping at least two diagnoses for women and 15 clusters for men (Table 1). We describe only the four most prevalent clusters (Table 2). For a complete description of the clusters and dendrograms, see Appendices 2-5.

**Table 2.** Four most prevalent clusters, by sex group (N(women)=217,823; N(men)=191,171)

| Prevalence 1, %*                | Prevalence 2, %† | Blocks of diagnoses                                                                    | Prevalence in group‡, % | Prevalence in cluster, % | AU p-value**        |
|---------------------------------|------------------|----------------------------------------------------------------------------------------|-------------------------|--------------------------|---------------------|
| <b>WOMEN</b>                    |                  |                                                                                        |                         |                          |                     |
| <b>WC1<sup>^</sup></b><br>82.1  | 52.9             | M50-M54:Other dorsopathies                                                             | 35.8                    | 43.5                     | 0.79<br>(0.74-0.85) |
|                                 |                  | F40-F48:Neurotic, stress-related and somatoform disorders                              | 27.3                    | 33.2                     |                     |
|                                 |                  | M70-M79:Other soft tissue disorders                                                    | 27.0                    | 32.8                     |                     |
|                                 |                  | N80-N98:Noninflammatory disorders of female genital tract                              | 24.2                    | 29.5                     |                     |
|                                 |                  | M20-M25:Other joint disorders                                                          | 18.6                    | 22.6                     |                     |
|                                 |                  | I80-I89:Diseases of veins, lymphatic vessels and lymph nodes, not elsewhere classified | 18.3                    | 22.2                     |                     |
|                                 |                  | D10-D36:Benign neoplasms                                                               | 16.2                    | 19.7                     |                     |
|                                 |                  | M15-M19:Arthrosis                                                                      | 15.7                    | 19.1                     |                     |
| <b>WC2</b><br>55.8              | 23.0             | E70-E90:Metabolic disorders                                                            | 37.4                    | 63.4                     | 0.93<br>(0.86-1.00) |
|                                 |                  | I10-I15:Hypertensive diseases                                                          | 25.6                    | 45.8                     |                     |
|                                 |                  | E65-E68:Obesity and other hyperalimentation                                            | 19.0                    | 34.0                     |                     |
|                                 |                  | E10-E14:Diabetes mellitus                                                              | 7.7                     | 13.7                     |                     |
| <b>WC3</b><br>47.4              | 10.8             | F10-F19:Mental and behavioural disorders due to psychoactive substance use             | 18.7                    | 39.4                     | 0.78<br>(0.73-0.84) |
|                                 |                  | E00-E07:Disorders of thyroid gland                                                     | 14.9                    | 31.4                     |                     |
|                                 |                  | F30-F39:Mood [affective] disorders                                                     | 14.6                    | 30.8                     |                     |
|                                 |                  | M80-M85:Disorders of bone density and structure                                        | 11.3                    | 23.9                     |                     |
| <b>WC4</b><br>32.3              | 6.4              | J00-J06:Acute upper respiratory infections                                             | 12.6                    | 39.1                     | 0.71<br>(0.66-0.77) |
|                                 |                  | K00-K14:Diseases of oral cavity, salivary glands and jaws                              | 12.1                    | 37.3                     |                     |
|                                 |                  | L20-L30:Dermatitis and eczema                                                          | 9.3                     | 28.8                     |                     |
|                                 |                  | B35-B49:Mycoses                                                                        | 5.7                     | 17.8                     |                     |
| <b>MEN</b>                      |                  |                                                                                        |                         |                          |                     |
| <b>MC1<sup>^^</sup></b><br>83.8 | 50.4             | E70-E90:Metabolic disorders                                                            | 42.2                    | 50.3                     | 0.69<br>(0.64-0.75) |
|                                 |                  | F10-F19:Mental and behavioural disorders due to psychoactive substance use             | 33.6                    | 40.1                     |                     |
|                                 |                  | I10-I15:Hypertensive diseases                                                          | 32.5                    | 38.8                     |                     |

|            |      |                                                        |                                                                                               |      |      |                     |
|------------|------|--------------------------------------------------------|-----------------------------------------------------------------------------------------------|------|------|---------------------|
|            |      | M50-M54:Other dorsopathies                             | 27.8                                                                                          | 33.2 |      |                     |
|            |      | E65-E68:Obesity and other hyperalimantation            | 14.6                                                                                          | 17.4 |      |                     |
|            |      | E10-E14:Diabetes mellitus                              | 14.2                                                                                          | 16.9 |      |                     |
| <b>MC2</b> | 57.6 | 24.2                                                   | M70-M79:Other soft tissue disorders                                                           | 16.9 | 29.3 | 0.87<br>(0.84-0.90) |
|            |      |                                                        | N40-N51:Diseases of male genital organs                                                       | 12.1 | 21.0 |                     |
|            |      |                                                        | M20-M25:Other joint disorders                                                                 | 12.1 | 20.9 |                     |
|            |      |                                                        | K20-K31:Diseases of oesophagus, stomach and duodenum                                          | 11.5 | 20.0 |                     |
|            |      |                                                        | I80-I89:Diseases of veins, lymphatic vessels and lymph nodes, not elsewhere classified        | 10.0 | 17.4 |                     |
|            |      |                                                        | K40-K46:Hernia                                                                                | 8.8  | 15.2 |                     |
|            |      |                                                        | D10-D36:Benign neoplasms                                                                      | 8.6  | 14.9 |                     |
|            |      |                                                        | M15-M19:Arthrosis                                                                             | 7.7  | 13.4 |                     |
|            |      | K55-K63:Other diseases of intestines                   | 6.4                                                                                           | 11.1 |      |                     |
| <b>MC3</b> | 54.1 | 20.7                                                   | F40-F48:Neurotic, stress-related and somatoform disorders                                     | 13.5 | 24.9 | 0.79<br>(0.74-0.84) |
|            |      |                                                        | K00-K14:Diseases of oral cavity, salivary glands and jaws                                     | 12.0 | 22.3 |                     |
|            |      |                                                        | J40-J47:Chronic lower respiratory diseases                                                    | 9.3  | 17.2 |                     |
|            |      |                                                        | J00-J06:Acute upper respiratory infections                                                    | 8.9  | 16.4 |                     |
|            |      |                                                        | J30-J39:Other diseases of upper respiratory tract                                             | 8.0  | 14.8 |                     |
|            |      |                                                        | L20-L30:Dermatitis and eczema                                                                 | 7.5  | 13.9 |                     |
|            |      |                                                        | G40-G47:Episodic and paroxysmal disorders                                                     | 7.4  | 13.7 |                     |
|            |      |                                                        | F50-F59:Behavioural syndromes associated with physiological disturbances and physical factors | 6.6  | 12.2 |                     |
|            |      |                                                        | F30-F39:Mood [affective] disorders                                                            | 6.3  | 11.6 |                     |
|            |      | B35-B49:Mycoses                                        | 4.1                                                                                           | 7.6  |      |                     |
| <b>MC4</b> | 25.2 | 4.7                                                    | H90-H95:Other disorders of ear                                                                | 7.7  | 30.6 | 0.87<br>(0.83-0.91) |
|            |      |                                                        | H53-H54:Visual disturbances and blindness                                                     | 3.9  | 15.5 |                     |
|            |      |                                                        | B00-B09:Viral infections characterized by skin and mucous membrane lesions                    | 3.5  | 13.9 |                     |
|            |      |                                                        | L60-L75:Disorders of skin appendages                                                          | 3.5  | 13.9 |                     |
|            |      |                                                        | H10-H13:Disorders of conjunctiva                                                              | 3.0  | 12.0 |                     |
|            |      |                                                        | H49-H52:Disorders of ocular muscles, binocular movement, accommodation and refraction         | 2.8  | 11.2 |                     |
|            |      |                                                        | L80-L99:Other disorders of the skin and subcutaneous tissue                                   | 2.5  | 10.0 |                     |
|            |      |                                                        | L00-L08:Infections of the skin and subcutaneous tissue                                        | 2.1  | 8.3  |                     |
|            |      | H00-H06:Disorders of eyelid, lacrimal system and orbit | 1.6                                                                                           | 6.5  |      |                     |

\*Individuals from the strata  $\geq 1$  diagnosis in the cluster/ † Individuals from the strata with  $\geq 2$  diagnosis in the cluster/#Strata: same sex

\*\*Approximately unbiased (AU) probability-value

^ Abbreviation of Sex, method and number (WC1: Women Cluster 1)

^^ Abbreviation of Sex, method and number (MC1: Men Cluster 1)



1  
2  
3 Twelve clusters with at least two diseases were identified for women, with prevalences  
4 ranging from 6.6% to 82.1% (median: 15.5%), (WC3; WC10). The clusters identified in men had  
5 prevalences ranging from 3.2% to 83.8% (median 10.1%). The most prevalent cluster included  
6  
7 8 diseases in women (WC1: musculoskeletal, psychiatric, circulatory, gynecological and  
8  
9 neoplasms) and 6 in men (MC1: metabolic and circulatory); about half of all patients had at  
10  
11 least two diagnoses (52.9% of women and 50.4% of men).  
12  
13  
14  
15

16 Two clusters were common to men and women, "Spondylopathies" and "Deforming  
17  
18 dorsopathies" (WC11, MC13) and "Urolithiasis" and "Other diseases of the urinary systems"  
19  
20 (WC9, MC12) (Box 1). The remaining clusters showed partial similarity in men and women,  
21  
22 based on six subsets (Box 2), except for three clusters found only in women (WC3, WC7,  
23  
24 WC10) and six only in men (MC4, MC5, MC8, MC10, MC14, MC15) (Appendices 4-5).  
25  
26  
27  
28  
29  
30  
31  
32  
33  
34  
35  
36  
37  
38  
39  
40  
41  
42  
43  
44  
45  
46  
47  
48  
49  
50  
51  
52  
53  
54  
55  
56  
57  
58  
59  
60

**BOXES****Box 1.** Combinations of diseases consistent in both men and women<sup>§</sup>**Clusters**

## Complete (whole) clusters

1. M45-M49:Spondylopathies\*  
M40-M43:Deforming dorsopathies (WC11;MC13)#
2. N20-N23:Urolithiasis  
N30-N39:Other diseases of urinary system (WC9; MC12)

## Subsets within clusters

1. E65-E68:Obesity and other hyperalimentionation  
I0-I15:Hypertensive diseases  
E10-E14:Diabetes mellitus (WC2; MC1)
2. M15-M19:Arthrosis  
M20-M25:Other joint disorders  
I80-I89:Diseases of veins, lymphatic vessels and lymph nodes, not elsewhere classified  
M70-M79:Other soft tissue disorders  
D10-D36:Benign neoplasms (WC1; MC2)
3. L20-L30:Dermatitis and eczema  
B35-B49:Mycoses  
K00-K14:Diseases of oral cavity, salivary glands and jaws  
J00-J06:Acute upper respiratory infections (WC4; MC3)
4. K70-K77:Diseases of liver  
K80-K87:Disorders of gallbladder, biliary tract and pancreas (WC12; MC7)
5. J30-J39:Other diseases of upper respiratory tract  
J40-J47:Chronic lower respiratory diseases (WC6; MC3)
6. K20-K31:Diseases of oesophagus, stomach and duodenum  
K40-K46:Hernia (WC5; MC2)
7. G50-G59:Nerve, nerve root and plexus disorders  
M65-M68:Disorders of synovium and tendon (WC8; MC6)

**Factors\***

## Subgroups within factors

1. I10-I15:Hypertensive diseases  
I20-I25:Ischaemic heart diseases  
I30-I52:Other forms of heart disease  
I70-I79:Diseases of arteries, arterioles and capillaries (WF3; MF2)
2. I10-I15:Hypertensive diseases  
E65-E68:Obesity and other hyperalimentionation (WF2;MF1)
3. J00-J06:Acute upper respiratory infections  
J20-J22:Other acute lower respiratory infections  
J09-J18:Influenza and pneumonia  
B25-B34:Other viral diseases  
A00-A09:Intestinal infectious diseases (WF4; MF6)
4. M15-M19:Arthrosis  
M45-M49:Spondylopathies  
M40-M43:Deforming dorsopathies  
M50-M54:Other dorsopathies (WF1;MF4)
5. K20-K31:Diseases of oesophagus, stomach and duodenum  
Q38-Q45:Other congenital malformations of the digestive system (WF6;MF8)
6. L20-L30:Dermatitis and eczema  
B35-B49:Mycoses  
H53-H54:Visual disturbances and blindness  
H10-H13:Disorders of conjunctiva  
L80-L99:Other disorders of the skin and subcutaneous tissue (WF5;MF5)
7. H25-H28:Disorders of lens  
H30-H36:Disorders of choroid and retina (WF3; MF7)

\* Coincident disease in both sexes

# Abbreviation of Sex (W: Women; M: Men), method (C: Hierarchical Cluster Analysis; F: Factor Analysis) and number (e.g. WC1: Women Cluster 1)

§ No two full factors were exactly the same for both sexes.

Underlined blocks of diagnosis represent coincident diseases in pattern.

**Box 2.** Combinations of diseases consistent across statistical methods (cluster and factor analysis)§

| <b>Women</b> |                                                                                                                                                                                                              |
|--------------|--------------------------------------------------------------------------------------------------------------------------------------------------------------------------------------------------------------|
| 1.           | <u>I10-I15:Hypertensive diseases*</u><br><u>E65-E68:Obesity and other hyperalimentionation</u><br>E10-E14:Diabetes mellitus (WC2; WF2)#                                                                      |
| 2.           | M15-M19:Arthrosis<br>M50-M54:Other dorsopathies<br>M70-M79:Other soft tissue disorders (WC1; WF1)                                                                                                            |
| 3.           | <u>L20-L30:Dermatitis and eczema</u><br><u>B35-B49:Mycoses (WC4; WF5)</u>                                                                                                                                    |
| 4.           | <u>M45-M49:Spondylopathies</u><br><u>M40-M43:Deforming dorsopathies (WC11; WF1)</u>                                                                                                                          |
| 5.           | K20-K31:Diseases of oesophagus, stomach and duodenum<br>K40-K46:Hernia (WC5; WF6)                                                                                                                            |
| 6.           | K70-K77:Diseases of liver<br>K80-K87:Disorders of gallbladder, biliary tract and pancreas (WC12 ;WF6)                                                                                                        |
| <b>Men</b>   |                                                                                                                                                                                                              |
| 1.           | <u>I10-I15:Hypertensive diseases</u><br><u>E65-E68:Obesity and other hyperalimentionation</u><br>E70-E90:Metabolic disorders (MC1; MF1)                                                                      |
| 2.           | I20-I25:Ischaemic heart diseases<br>I30-I52:Other forms of heart disease<br>I60-I69:Cerebrovascular diseases<br>I70-I79:Diseases of arteries, arterioles and capillaries<br>N17-N19:Renal failure (MC5; MF2) |
| 3.           | J09-J18:Influenza and pneumonia<br>J20-J22:Other acute lower respiratory infections<br>B25-B34:Other viral diseases<br>A00-A09:Intestinal infectious diseases (MC10; MF6)                                    |
| 4.           | H10-H13:Disorders of conjunctiva<br>H53-H54:Visual disturbances and blindness<br>L80-L99:Other disorders of the skin and subcutaneous tissue (MC4; MF5)                                                      |
| 5.           | <u>M45-M49:Spondylopathies</u><br><u>M40-M43:Deforming dorsopathies (MC13; MF4)</u>                                                                                                                          |
| 6.           | <u>L20-L30:Dermatitis and eczema</u><br><u>B35-B49:Mycoses (MC3; MF5)</u>                                                                                                                                    |
| 7.           | K70-K77:Diseases of liver<br>B15-B19:Viral hepatitis (MC7; MF3)                                                                                                                                              |
| 8.           | T08-T14:Injuries to unspecified part of trunk, limb or body region<br>S90-S99:Injuries to the ankle and foot (MC8; MF9)                                                                                      |
| 9.           | H25-H28:Disorders of lens<br>H40-H42:Glaucoma (MC14; MF7)                                                                                                                                                    |

\* Coincident disease in both methods

# Abbreviation of Sex (W: Women; M: Men), method (C: Hierarchical Cluster Analysis; F: Factor Analysis) and number (e.g. WC1: Women Cluster 1)§ All subgroups of factors or clusters, no single cluster exactly the same as a factor.  
Underlined blocks of diagnosis represent coincident diseases in pattern.

The top four clusters were reproduced in the graphical representation of coordinates using MDS. The most prevalent disease clusters were more clearly separated in women than they were in men, mostly due to the overlap of MC2 and MC3 (Figure 1).

### Exploratory Factor Analysis

Using EFA, we obtained nine factors for women and 10 factors for men. In this analysis, the median number of diagnoses per factor was higher in women (Table 1). Two factors explained more than 50% of total variance (58.5% for women (WF2; WF3) and 50.7% for men (MF1; MF2)). All diseases were assigned to single factors except for three diseases, two in women only (J20-J22: Other acute lower respiratory infections and E10-E14: Diabetes mellitus) and one in both women and men (I10-I15: Hypertensive diseases); all three were assigned to two factors. The first four factors are described in Table 3; full factor solutions are shown in Appendices 6-7.

**Table 3.** Four most prevalent factors, by sex (N(women)=217,823; N(men)=191,171)

| Prevalence 1, %*               | Prevalence 2, %† | Blocks of diagnoses**                                    | Prevalence in group, % | Prevalence in factor, % | Variance proportion, % | Cumulative Variance proportion, % |
|--------------------------------|------------------|----------------------------------------------------------|------------------------|-------------------------|------------------------|-----------------------------------|
| <b>WOMEN</b>                   |                  |                                                          |                        |                         |                        |                                   |
| <b>WF1<sup>^</sup></b><br>59.7 | 25.4             | M50-M54:Other dorsopathies                               | 35.8                   | 59.9                    | 10.6                   | 69.1                              |
|                                |                  | M70-M79:Other soft tissue disorders                      | 27.0                   | 45.2                    |                        |                                   |
|                                |                  | M15-M19:Arthrosis                                        | 15.7                   | 26.2                    |                        |                                   |
|                                |                  | G50-G59:Nerve, nerve root and plexus disorders           | 8.5                    | 14.3                    |                        |                                   |
|                                |                  | M45-M49:Spondylopathies                                  | 4.3                    | 7.3                     |                        |                                   |
|                                |                  | M40-M43:Deforming dorsopathies                           | 3.8                    | 6.4                     |                        |                                   |
| <b>WF2</b><br>37.8             | 12.0             | I10-I15:Hypertensive diseases                            | 25.6                   | 67.6                    | 7.0                    | 84.5                              |
|                                |                  | E65-E68:Obesity and other hyperalimentionation           | 19.0                   | 50.2                    |                        |                                   |
|                                |                  | E10-E14:Diabetes mellitus                                | 7.7                    | 20.3                    |                        |                                   |
| <b>WF3</b><br>32.8             | 8.1              | I10-I15:Hypertensive diseases                            | 25.6                   | 78.0                    | 20.2                   | 58.6                              |
|                                |                  | E10-E14:Diabetes mellitus                                | 7.7                    | 23.4                    |                        |                                   |
|                                |                  | I30-I52:Other forms of heart disease                     | 4.4                    | 13.3                    |                        |                                   |
|                                |                  | H25-H28:Disorders of lens                                | 1.7                    | 5.3                     |                        |                                   |
|                                |                  | H30-H36:Disorders of choroid and retina                  | 1.2                    | 3.6                     |                        |                                   |
|                                |                  | I70-I79:Diseases of arteries, arterioles and capillaries | 1.1                    | 3.2                     |                        |                                   |
| <b>WF4</b><br>27.6             | 5.9              | J00-J06:Acute upper respiratory infections               | 12.6                   | 45.8                    | 38.3                   | 38.3                              |
|                                |                  | N30-N39:Other diseases of urinary system                 | 5.9                    | 21.3                    |                        |                                   |
|                                |                  | H60-H62:Diseases of external ear                         | 3.6                    | 13.1                    |                        |                                   |
|                                |                  | J20-J22:Other acute lower respiratory infections         | 3.4                    | 12.2                    |                        |                                   |
|                                |                  | A00-A09:Intestinal infectious diseases                   | 2.7                    | 10.0                    |                        |                                   |

|                                 |      |                                                                            |      |      |      |      |
|---------------------------------|------|----------------------------------------------------------------------------|------|------|------|------|
|                                 |      | H65-H75:Diseases of middle ear and mastoid                                 | 2.5  | 9.2  |      |      |
|                                 |      | J09-J18:Influenza and pneumonia                                            | 1.7  | 6.1  |      |      |
|                                 |      | B25-B34:Other viral diseases                                               | 1.3  | 4.8  |      |      |
|                                 |      | M60-M63:Disorders of muscles                                               | 1.2  | 4.4  |      |      |
| <b>MEN</b>                      |      |                                                                            |      |      |      |      |
| <b>MF1<sup>^^</sup></b><br>61.7 | 26.1 | E70-E90:Metabolic disorders                                                | 42.2 | 68.3 | 5.1  | 94.8 |
|                                 |      | I10-I15:Hypertensive diseases                                              | 32.6 | 52.7 |      |      |
|                                 |      | E65-E68:Obesity and other hyperalimentionation                             | 14.6 | 23.6 |      |      |
|                                 |      | M05-M14:Inflammatory polyarthropathies                                     | 5.4  | 8.7  |      |      |
| <b>MF2</b><br>39.4              | 8.7  | I10-I15:Hypertensive diseases                                              | 32.5 | 82.6 | 28.5 | 28.5 |
|                                 |      | I30-I52:Other forms of heart disease                                       | 6.9  | 17.6 |      |      |
|                                 |      | I20-I25:Ischaemic heart diseases                                           | 5.0  | 12.6 |      |      |
|                                 |      | I70-I79:Diseases of arteries, arterioles and capillaries                   | 2.4  | 6.1  |      |      |
|                                 |      | I60-I69:Cerebrovascular diseases                                           | 1.8  | 4.6  |      |      |
|                                 |      | N17-N19:Renal failure                                                      | 1.5  | 3.7  |      |      |
| <b>MF3</b><br>38.5              | 4.4  | F10-F19:Mental and behavioural disorders due to psychoactive substance use | 33.6 | 87.2 | 5.3  | 89.6 |
|                                 |      | K70-K77:Diseases of liver                                                  | 5.2  | 13.6 |      |      |
|                                 |      | B15-B19:Viral hepatitis                                                    | 3.2  | 8.4  |      |      |
|                                 |      | F20-F29:Schizophrenia, schizotypal and delusional disorders                | 1.1  | 2.9  |      |      |
| <b>MF4</b><br>34.7              | 5.1  | M50-M54:Other dorsopathies                                                 | 27.8 | 80.2 | 7.3  | 77.8 |
|                                 |      | M15-M19:Arthrosis                                                          | 7.7  | 22.2 |      |      |
|                                 |      | M45-M49:Spondylopathies                                                    | 3.1  | 8.8  |      |      |
|                                 |      | M40-M43:Deforming dorsopathies                                             | 1.8  | 5.2  |      |      |

\*Individuals from the strata  $\geq 1$  diagnosis in the factor/ † Individuals from the strata with  $\geq 2$  diagnosis in the factor/#Strata: same sex

\*\*KMO sampling adequacy index was 0.82 for women and 0.75 for men. Bartlett Test of Sphericity was statistically significant. ( $p < 0.001$ ) for both groups

^ Abbreviation of Sex, method and number (WF1: Women Factor 1)

^^ Abbreviation of Sex, method and number (MC1: Men Factor 1)

Although no factor-based groupings were identical in men and women, almost all showed partial similarity by sex, based on seven subsets (Box 1), except for two groups found only in women (WF7, WF9) and one found only in men (MF9).

### Multimorbidity patterns comparison across statistical approaches

The EFA multimorbidity patterns were more easily interpreted than the HCA groups, either because they made more sense from a clinical perspective or because of greater homogeneity

1  
2  
3 in the diagnoses: about half of the factors containing at least 3 diagnoses corresponded to a  
4 maximum of 2 ICD-10 blocks, compared to about one fifth of the HCA clusters with at least 3  
5 diseases (1/5 for women and 2/11 for men). No grouping solution for women or for men  
6 contained exactly the same set of diseases as a cluster and as a factor. Six clusters (WC3, WC6,  
7 WC7, WC8, WC9, WC10) and two factors (WF7, WF9) were only observed in women. However,  
8 six subsets of diseases were part of the same grouping in both a cluster and a factor (Box 2); all  
9 included two or three diagnoses, usually from the same ICD chapter. Five clusters and one  
10 factor were observed only in men (MC6, MC9, MC11, MC12, MC15 and MF6). Nine subsets of  
11 diseases were observed as part of the same grouping in both a cluster and a factor (Box 2).  
12 They included a range of diseases (2-5) and most frequently included diseases from different  
13 ICD chapters.

14  
15  
16  
17  
18  
19  
20  
21  
22  
23  
24  
25  
26  
27  
28  
29  
30  
31  
32  
33  
34  
35  
36  
37  
38  
39  
40  
41  
42  
43  
44  
45  
46  
47  
48  
49  
50  
51  
52  
53  
54  
55  
56  
57  
58  
59  
60

Three paired diseases were observed consistently in both men and women using both methods of analysis: 1) Hypertensive diseases and obesity/other hyperalimentation; 2) spondylopathies and deforming dorsopathies; and 3) dermatitis/eczema and mycoses.

## DISCUSSION

In this study we have observed differences in the groupings identified with the two most frequently used methods (HCA and EFA). No grouping solution contained exactly the same set of diseases as a cluster and as a factor, although some overlap was observed in both groups. Internal quality validation with AU p-values showed strong evidence of the multimorbidity patterns in the data.

The multimorbidity patterns obtained by HCA were identified graphically with MDS, allowing us to observe a given hierarchical structure. Nevertheless, internal quality validation with AU p-values showed strong evidence of the multimorbidity patterns in the data.

1  
2  
3 EFA, based on tetrachoric correlations where the dichotomous diseases were assumed to  
4  
5 come from an underlying mechanism with a continuous variable, produced a wide range of  
6  
7 multimorbidity patterns with several levels of correlations. Most of them seem to be highly  
8  
9 consistent from a clinical perspective. The multimorbidity patterns obtained with EFA show a  
10  
11 main factor (a disease) that has a correlation with another disease, either coexisting or that  
12  
13 may occur during the patient's clinical course. [20] Thus, EFA could be more useful for  
14  
15 analyzing comorbidity and for describing the correlation between diseases that have a  
16  
17 pathophysiological relationship. This approach also may help to answer the question of which  
18  
19 condition should be considered the main disease and which the comorbidity.  
20

21  
22 The HCA results would be useful in generating new hypotheses for intercluster and intracluster  
23  
24 associations between diseases that could be applied to the analysis of multimorbidity, defined  
25  
26 as the random coexistence of diseases or clusters that indicates significant associations  
27  
28 between diseases without a causal explanation. In future studies, other non-hierarchical  
29  
30 cluster analysis techniques will improve measurement of the observed distances and multiple  
31  
32 interrelationships between different diseases in a given individual.[21] On the other hand, EFA  
33  
34 could be more useful for analyzing multimorbidity patterns in the absence of causal  
35  
36 comorbidity and for describing visual representation of diseases correlation with a  
37  
38 pathophysiological relationship between them.  
39

40  
41 We obtained two perfect clusters that were common to both men and women:  
42  
43 "spondylopathies and deforming dorsopathies" and "urolithiasis and other diseases of the  
44  
45 urinary system". In the first cluster, spondylosis is a degenerative disorder that may cause loss  
46  
47 of normal spinal structure and function and lead to scoliosis. Nevertheless, many individuals  
48  
49 with untreated scoliosis will develop spondylosis; this may be one reason why these diseases  
50  
51 were associated.[22] The second cluster can be explained by the complications produced by  
52  
53 urolithiasis (such as urinary tract infection, persistent proteinuria, stress incontinence or other  
54  
55 unspecified urinary incontinence) and those that have a pathophysiological explanation. [23]  
56  
57  
58  
59  
60

1  
2  
3 EFA showed that the most frequent pattern in women was infectious diseases. This previously  
4 unreported pattern suggests that the multimorbidity patterns obtained in other studies are  
5 affected by the type of diseases included in each study.  
6  
7

8  
9 Although the patterns obtained with both methods did not match exactly, finding matching  
10 pairs of diseases by both methods reinforces the idea that patterns of multimorbidity have a  
11 dominant disease that associates in some way with other diseases.  
12  
13

14  
15 In general, it is difficult to compare our results with other studies because of variations in  
16 methods, data sources and structures, and populations and diseases studied. Six studies have  
17 been performed with HCA[8,21,24–27] and three using EFA.[28–30] Until now, very few  
18 analyses of multimorbidity patterns have used multiple methods to compare the same  
19 population.[21] The latter study included people aged 50 years and older, considering 11  
20 diseases and using 2 different cluster methods, hierarchical (average linkage) and  
21 nonhierarchical (k-medoids), and one method for EFA (principal component analysis). The  
22 observed differences between this study and our results can be explained by differences in the  
23 underlying statistical formulae and diseases considered in both studies.  
24  
25  
26  
27  
28  
29  
30  
31  
32  
33

34 The major strength of this study is the dual analysis (HCA and EFA) of a large, high-quality  
35 database of primary care records that have been shown to be representative of a much larger  
36 population, stratified by sex. Admittedly, this analysis of almost all potential diagnoses may  
37 have added a complexity that will hinder interpretation of findings and comparison with other  
38 studies, particularly because the boundaries between chronic and acute disease are not always  
39 clear.[31,32] Whatever consistency (or discrepancy) we observed was validated by the findings  
40 of two different approaches, which helps to identify the most appropriate use of each method  
41 in analyzing multimorbidity. We emphasize that the inclusion of chronic and acute diseases is a  
42 strength and not a weakness. Because, as we have shown, there are many chronic and acute  
43 diseases that coexist at a set time and this has implications for health care.  
44  
45  
46  
47  
48  
49  
50  
51  
52  
53  
54  
55  
56  
57  
58  
59  
60



1  
2  
3 Internal validation with bootstrap methods, AU p-values, and MDS techniques provided more  
4 robust evidence for the cluster analysis. The KMO values obtained show the adequacy of fit of  
5 the factor analysis. These values were similar or higher than previous studies.[28,29]  
6

7  
8 A limitation of this study is our use of agglomerative hierarchical clustering, which forces every  
9 unit (i.e., diagnosis) into a single cluster. HCA is exploratory in nature, and different clustering  
10 algorithms may produce different results.[33] The final clustering solution presented here was  
11 obtained through a systematic and rigorous process: comparing the results from a randomly  
12 split dataset, testing different clustering algorithms, and using different objective numeric  
13 criteria to decide the number of clusters, internal validation, and graphical representation. In  
14 addition, a panel of experts applied subjective clinical criteria to assess the interpretability of  
15 the groupings in everyday practice. In addition, EFA is problematic for binary data, which can  
16 be grouped because of having similar distributions rather than any common underlying  
17 feature. On the other hand, in factor analysis the measure of association incorporates  
18 information on both positive and negative concordances [9]. In contrast, the analysis of  
19 clusters allows us to show that the occurrence of one or more health conditions can be  
20 conditioned by their co-occurrence, without considering negative concordances. [8] Due to the  
21 absence of a standard methodology to compare method solutions we have used ad hoc  
22 methodology. Finally, another limitation is our use of ICD-10 3-character codes as the unit of  
23 analysis, rather than the more specific individual diagnosis, but its use is justified to avoid  
24 spurious relationships that more than 10,000 individual codes of the ICD-10 could produce.  
25  
26  
27  
28  
29  
30  
31  
32  
33  
34  
35  
36  
37  
38  
39  
40  
41  
42  
43  
44

45 This is a cross-sectional study, based on EHR of The Catalan Health Institute and SIDIAP-Q is  
46 highly representative for the whole region in terms of both geography, age, gender and  
47 diseases, that avoid selection bias.  
48  
49

50  
51 Multimorbidity can present a problem for health services delivery, affecting patients, health  
52 professionals and managers who are attempting to improve service delivery. Our study offers  
53 two methodological approaches to understanding the relationships between specific diseases,  
54  
55  
56  
57  
58

1  
2  
3 which is an essential step in improving our approach to this problem. Although we  
4  
5 demonstrated that different analytical methods can yield different results, we also showed  
6  
7 that some associations were consistent in both analyses. This study illustrates the need to pay  
8  
9 careful attention to the methods used to support policies and decision-making. Clinical  
10  
11 guidelines tend to focus on a single disease rather than on multimorbidity, which includes not  
12  
13 only diseases but also drug interactions and polypharmacy. The present study confirmed that  
14  
15 multimorbidity patterns are a reality in the adult population, and do not apply only to chronic  
16  
17 diseases. New guidelines are needed that incorporate multimorbidity into clinical  
18  
19 recommendations.

20  
21 This study was one of the first to compare the two most commonly used methodologies, HCA  
22  
23 and EFA, in a large database that includes a large number of diseases. The findings reveal  
24  
25 another limitation to be taken into account in comparing multimorbidity patterns between  
26  
27 studies: in addition to the spectrum, number and type of diseases included, these patterns  
28  
29 vary depending on the method of analysis used. Nevertheless, it would be necessary to carry  
30  
31 out a simulation study to determine how the choice of method may affect the patterns, as it  
32  
33 allows us to test the obtained patterns in all kinds of situations.

34  
35  
36  
37 The results suggest that HCA can be useful to detect multimorbidity patterns and identify  
38  
39 different associations between diseases, as the method allows for the possibility that one or  
40  
41 more health problems can occur conditionally. On the other hand, EFA seems more applicable  
42  
43 to clinical practice because places less restrictions in the diseases grouping, so may be better  
44  
45 for generating hypotheses and is more sensitive in identifying clinical associations. Our results  
46  
47 suggest that these aspects be considered in planning of future studies, including selection of  
48  
49 diseases and methods of analysis.

1  
2  
3 Finally, our analysis of multimorbidity patterns only considered associations between diseases.  
4  
5 Further studies are needed to analyze the patterns that develop longitudinally as individual  
6  
7 patients acquire subsequent comorbidities.  
8  
9  
10  
11  
12  
13  
14

## 15 **Conclusions**

16  
17  
18 The multimorbidity patterns obtained with EFA show a main factor (i.e., a disease) that has  
19  
20 some correlation with the additional diseases in the pattern, suggesting a comorbidity  
21  
22 relationship. Meanwhile, the HCA would be useful for in-depth study of multimorbidity  
23  
24 pattern. We introduced new evidence about the known limitations of attempts to compare  
25  
26 multimorbidity or comorbidity patterns between RWD studies, as our results add information  
27  
28 about aspects that must be considered in standardization of future studies: spectrum of  
29  
30 diseases, data utilization, and methods of analysis.  
31  
32  
33  
34  
35  
36  
37  
38  
39  
40  
41  
42  
43  
44  
45  
46  
47  
48  
49  
50  
51  
52  
53  
54  
55  
56  
57  
58  
59  
60

## Footnotes

**Contributors:** All authors contributed to the design of the study, revised the article, and approved the final version. CV and QFB obtained the funding. ARL and CV drafted the article. ARL, CV, QFB, TRB, MPV, EPR and JMV contributed to the analysis and interpretation of data. ARL and CV wrote the first draft, and all authors (ARL, CV, QFB, TRB, MPV, EPR and JMV) contributed ideas, interpreted the findings and reviewed rough drafts of the manuscript. All authors read and approved the final manuscript.

**Funding:** The project has been funded by the *Instituto de Salud Carlos III* of the Ministry of Economy and Competitiveness (Spain) through the Network for Prevention and Health Promotion in Primary Health Care (rediAPP, RD12/0005/0001; RD16/0007/001), and by European Union ERDF funds. Also, by a grant for research projects on health from ISCiii (PI12/00427) and co-financed with European Union ERDF funds). Jose M. Valderas was supported by the National Institute for Health Research Clinician Scientist Award NIHR/CS/010/024. The funders had no role in the study design, collection, analysis and interpretation of data, writing of the manuscript or decision to submit for publication. The views expressed in this publication are those of the author(s) and not necessarily those of the National Health Service, the National Institute for Health Research, or the National Department of Health.

**Competing interests:** None declared.

**Ethical considerations:** The study protocol was approved by the Committee on the Ethics of Clinical Research, IDIAP Jordi Gol (Protocol No: P12/28). All data were anonymized and EHR confidentiality was respected in accordance with national and international law.

**Acknowledgment:** We thank the Catalan Health Institute and especially the SIDIAP Unit, which provided the database for the study. The authors also appreciate the English language review by Elaine Lilly, PhD, and are grateful to Carmen Ibáñez for administrative work.

**Data Sharing:** The datasets are not available because researchers have signed an agreement with the Information System for the Development of Research in Primary Care (SIDIAP) concerning confidentiality and security of the dataset that forbids providing data to third parties. This organization is subject to periodic audits to ensure the validity and quality of the data.

## References

1. Valderas J, Starfield B, Sibbald B, et al. Defining comorbidity: Implications for understanding health and health services. *Ann Fam Med* 2009;**7**: 357–363.
2. Violan C, Foguet-Boreu Q, Flores-Mateo G, et al. Prevalence, determinants and patterns of multimorbidity in primary care: a systematic review of observational studies. *PLoS One* 2014;**9**: e102149.
3. Prados-Torres A, Calderón-Larrañaga A, Hanco-Saavedra J, et al. Multimorbidity patterns: A systematic review. *J Clin Epidemiol* 2014;**67**: 254–266.
4. Fortin M, Stewart M, Poitras ME, et al. A systematic review of prevalence studies on multimorbidity: Toward a more uniform methodology. *Ann Fam Med* 2012;**10**: 142–151.
5. Corrao, G., Mancia, G., Generating evidence from computerized health care utilization databases. *Hypertension* 2015; **65**(3):490-8.
- 6.. Everitt B, Landau S, Leese M, et al. Cluster Analysis. 5th ed. Hoboken: Wiley; 2011.
7. Thompson B. Exploratory and Confirmatory Factor Analysis: Understanding Concepts and Applications. Washington, DC: American Psychological Association; 2004.
8. Cornell JE, Pugh JA, Williams J, et al. Multimorbidity clusters: clustering binary data from multimorbidity clusters : clustering binary data from a large administrative medical database. *Appl Multivar Res* 2007;**12**: 163–182.
9. Nunnally J, Berstein I. Psychometric theory. 3rd ed. New York: McGraw-Hill, Inc; 1994.
- 10.. Del Mar Garcia-Gil M, Hermosilla E, Prieto-Alhambra D, et al. Construction and validation of a scoring system for the selection of high-quality data in a Spanish population primary care database (SIDIAP). *Inform Prim Care* 2012;**19**: 135–145.
11. Prieto-Alhambra D, Judge A, Javaid MK, et al. Incidence and risk factors for clinically diagnosed knee, hip and hand osteoarthritis: influences of age, gender and osteoarthritis affecting other joints. *Ann Rheum Dis* 2014;**73**: 1659–64.

- 1  
2  
3 12. Ramos R, Balló E, Marrugat J, et al. Validity for use in research on vascular diseases of the  
4 SIDIAP (Information System for the Development of Research in Primary Care): the EMMA  
5 study. *Rev Esp Cardiol (Engl Ed)* 2012;**65**: 29–37.  
6  
7  
8  
9 13. Foguet-Boreu Q, Violán C, Rodriguez-Blanco T, et al. Multimorbidity Patterns in Elderly  
10 Primary Health Care Patients in a South Mediterranean European Region: A Cluster Analysis.  
11 *PLoS One* 2015;**10**: e0141155.  
12  
13  
14  
15 14. Foguet-Boreu Q, Violan C, Roso-Llorach A, et al. Impact of multimorbidity: acute morbidity,  
16 area of residency and use of health services across the life span in a region of south Europe.  
17 *BMC Fam Pract* 2014;**15**: 55.  
18  
19  
20  
21 15. Violán C, Foguet-Boreu Q, Roso-Llorach A, et al. Burden of multimorbidity, socioeconomic  
22 status and use of health services across stages of life in urban areas: a cross-sectional study.  
23 *BMC Public Health* 2014;**14**: 1–13.  
24  
25  
26  
27 16. Violán C, Foguet-Boreu Q, Roso-Llorach A, et al. Patrones de multimorbilidad en adultos  
28 jóvenes en Cataluña: un análisis de clústeres. *Aten Primaria* 2016; **48**:479-92.  
29  
30  
31  
32 17. World Health Organization. ICD-10 International Statistical Classification of Diseases and  
33 Related Health Problems 10th Revision. 2007.  
34  
35  
36  
37 18. Shimodaira H. Approximately unbiased tests of regions using multistep-multiscale  
38 bootstrap resampling 32: *Ann Stat* 2004;**32**: 2616–2641.  
39  
40  
41 19. Borg I. Modern Multidimensional Scaling: theory and applications (2nd ed.). 2 nd. Springer-  
42 Verlag, editor. New York; 2005.  
43  
44  
45 20. Feinstein AR. The pre-therapeutic classification of co-morbidity in chronic disease. *J*  
46 *Chronic Dis* 1970; **23**(7):455-68.  
47  
48  
49 21. Islam M, Valderas J, Yen L, et al. Multimorbidity and comorbidity of chronic diseases among  
50 the senior Australians: prevalence and patterns. *PLoS One* 2014;**9**: e83783.  
51  
52  
53 22. Pappou IP, Girardi FP, Sandhu HS, et al. Discordantly high spinal bone mineral density  
54 values in patients with adult lumbar scoliosis. *Spine (Phila Pa 1976)*. 2006;**31**: 1614–1620.  
55  
56  
57  
58  
59  
60

- 1  
2  
3 23. Bartoletti R, Cai T, Mondaini N, et al. Epidemiology and risk factors in urolithiasis. *Urol Int*  
4  
5 2007;**79** Suppl 1: 3–7.  
6  
7 24. Formiga F, Ferrer A, Sanz H, et al. Patterns of comorbidity and multimorbidity in the oldest  
8  
9 old: The Octabaix study. *Eur J Intern Med* 2013;**24**: 40–44.  
10  
11 25. John R, Kerby DS and Hennessy CH. Patterns and impact of comorbidity and multimorbidity  
12  
13 among community-resident American Indian elders. *Gerontologist* 2003;**43**: 649–660.  
14  
15 26. Marengoni A, Rizzuto D, Wang HX, et al. Patterns of chronic multimorbidity in the elderly  
16  
17 population. *J Am Geriatr Soc* 2009;**57**: 225–230.  
18  
19 27. Newcomer SR, Steiner JF and Bayliss EA. Identifying subgroups of complex patients with  
20  
21 cluster analysis. *Am J Manag Care* 2011;**17**: e324–32.  
22  
23 28. Schäfer I, von Leitner EC, Schön G, et al. Multimorbidity patterns in the elderly: a new  
24  
25 approach of disease clustering identifies complex interrelations between chronic conditions.  
26  
27 *PLoS One* 2010;**5**: e15941.  
28  
29 29. Andre L, Prados-torres A, Poblador-plou B, et al. Multimorbidity Patterns in Primary Care :  
30  
31 Interactions among Chronic Diseases Using Factor Analysis. *PLoS One* 2012;**7**(2): e32190.  
32  
33 30. Poblador-Plou B, van den Akker M, Vos R, et al. Similar multimorbidity patterns in primary  
34  
35 care patients from two European regions: results of a factor analysis. *PLoS One* 2014;**9**:  
36  
37 e100375.  
38  
39 31. O'Halloran J, Miller GC and Britt H. Defining chronic conditions for primary care with ICPC-  
40  
41 2. *Fam Pract* 2004;**21**: 381–386.  
42  
43 32. Lamberts H and Wood M. International Classification of Primary Care. Oxford. Press OU,  
44  
45 editor. Oxford; 2011.  
46  
47 33. Aldenderfer MS and Blashfield RK. Cluster Analysis: Quantitative Applications in the Social  
48  
49 Sciences. 1984.  
50  
51  
52  
53  
54  
55  
56  
57  
58  
59  
60

**Figure 1**

**Figure 1a.** Top four clusters in women (n= 217,823) aged 45-64 years, analyzed with multidimensional scaling.

**Figure 1b.** Top four clusters in men (n= 191,171) aged 45-64 years, analyzed with multidimensional scaling.

**Appendix**

**Appendix 1.** Study Flow Chart.

**Appendix 2.** Cluster dendrogram in women aged 45-64 years.

**Appendix 3.** Cluster dendrogram in men aged 45-64 years, with approximately unbiased (AU) probability value.

**Appendix 4.** Prevalence and composition of diagnostic clusters in women aged 45-64 years (n= 217,823).

**Appendix 5.** Prevalence and composition of diagnostic clusters in men aged 45-64 years (n= 191,171).

**Appendix 6.** Factors in women aged 45-64 years (n= 217,823).

**Appendix 7.** Factors in men aged 45-64 years (n= 191,171).



Figure 1a. Top four clusters in women (n= 217,823) aged 45-64 years, analyzed with multidimensional scaling

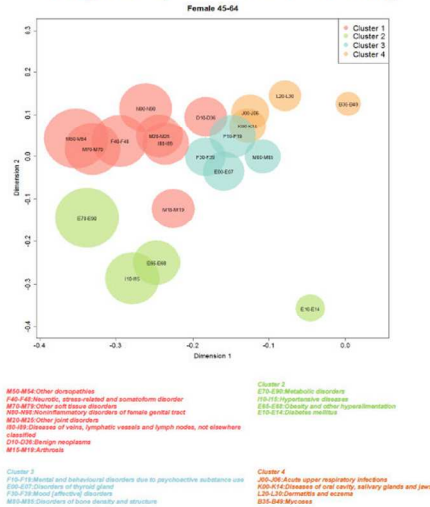

**Cluster 1**  
 M50-M52 Other osteopathies  
 F40-F49 Neurotic, stress-related and somatoform disorder  
 M20-M22 Other joint diseases  
 M25-M26 Noninflammatory disorders of female genital tract  
 M20-M22 Other joint diseases  
 I80-I89 Diseases of veins, lymphatic vessels and lymph nodes, not elsewhere classified  
 I70-I79 Design receptors identified  
 M10-M19 Arteriosclerosis  
**Cluster 2**  
 E70-E85 Endocrine disorders  
 I20-I25 Hypertensive disease  
 I40-I49 Coronary and other hyperalimentation  
 E10-E14 Diabetes mellitus  
**Cluster 3**  
 I70-I79 Mental and behavioural disorders due to psychoactive substance use  
 I80-I89 Diseases of eyelid and conjunctiva  
 F30-F39 Mood (affective) disorders  
 M00-M09 Diseases of bone density and structure  
**Cluster 4**  
 J00-J06 Acute upper respiratory infections  
 J10-J18 Diseases of ear, nose, throat, oral cavity, salivary glands and jaws  
 J20-J29 Chronic and acute tonsillitis and adenitis  
 I80-I89 Mycoses

Note: The cluster number are the same as expressed in table 2.

Figure 1 b. Top four clusters in men (n= 191,171) aged 45-64 years, analyzed with multidimensional scaling



**Cluster 1**  
 E70-E85 Endocrine disorders  
 F10-F19 Mental and behavioural disorders due to alcoholism  
 I20-I25 Hypertensive diseases  
 M50-M52 Other osteopathies  
 E85-E86 Obesity and other hyperalimentation  
 E10-E14 Diabetes mellitus  
**Cluster 2**  
 M10-M19 Other soft tissue disorders  
 M40-M41 Diseases of male genital organs  
 M20-M22 Other joint diseases  
 I20-I25 Diseases of atherosclerosis, myocardial infarction and angina pectoris  
 I80-I89 Diseases of veins, lymphatic vessels and lymph nodes, not elsewhere classified  
 M40-M41 Arthritis  
 I20-I25 Design receptors identified  
**Cluster 3**  
 I70-I79 Mental and behavioural disorders due to psychoactive substance use  
 I80-I89 Diseases of eyelid and conjunctiva  
 F30-F39 Mood (affective) disorders  
 M00-M09 Diseases of bone density and structure  
**Cluster 4**  
 J00-J06 Acute upper respiratory infections  
 J10-J18 Diseases of ear, nose, throat, oral cavity, salivary glands and jaws  
 J20-J29 Chronic and acute tonsillitis and adenitis  
 I80-I89 Mycoses

Figure 1

Figure 1a. Top four clusters in women (n= 217,823) aged 45-64 years, analyzed with multidimensional scaling.

Figure 1b. Top four clusters in men (n= 191,171) aged 45-64 years, analyzed with multidimensional scaling.

97x64mm (300 x 300 DPI)

## Appendix 1. Study Flow Chart.



## Appendix 2. Cluster dendrogram in women aged 45-64 years.

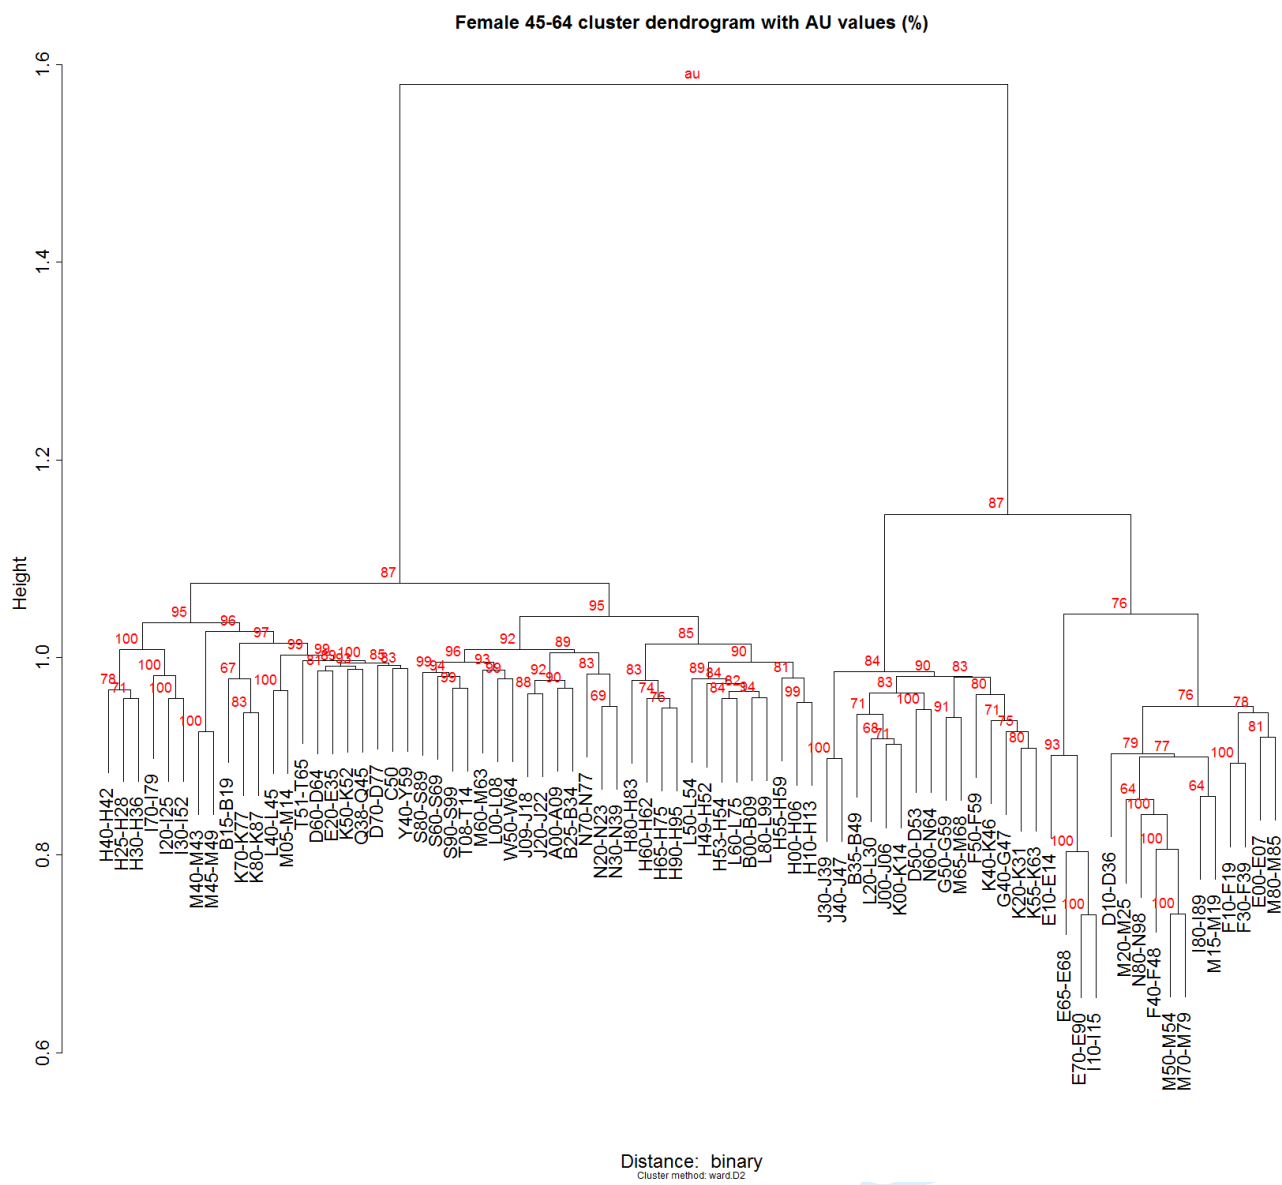

**Appendix 3.** Cluster dendrogram in men aged 45-64 years, with approximately unbiased (AU) probability value.



**Appendix 4.** Prevalence and composition of diagnostic clusters in women aged 45-64 years (n= 217,823).

| Cluster order number, n           | Prevalence 1 (%)* | Prevalence 2 (%)† | Blocks of diagnoses                                                                    | Prevalence in group‡, % | Prevalence in cluster, % | Most prevalent diagnoses of the block                         | AU p-value**     |
|-----------------------------------|-------------------|-------------------|----------------------------------------------------------------------------------------|-------------------------|--------------------------|---------------------------------------------------------------|------------------|
| <b>WC1<sup>^</sup></b><br>178,849 | 82.1              | 52.9              | M50-M54:Other dorsopathies                                                             | 35.8                    | 43.5                     | M54 Dorsalgia                                                 | 0.79 (0.74-0.85) |
|                                   |                   |                   | F40-F48:Neurotic, stress-related and somatoform disorders                              | 27.3                    | 33.2                     | F41 Other anxiety disorders                                   |                  |
|                                   |                   |                   | M70-M79:Other soft tissue disorders                                                    | 27.0                    | 32.8                     | M79 Other soft tissue disorders, not elsewhere classified     |                  |
|                                   |                   |                   | N80-N98:Noninflammatory disorders of female genital tract                              | 24.2                    | 29.5                     | N95 Menopausal and other perimenopausal disorders             |                  |
|                                   |                   |                   | M20-M25:Other joint disorders                                                          | 18.6                    | 22.6                     | M25 Other joint disorders, not elsewhere classified           |                  |
|                                   |                   |                   | I80-I89:Diseases of veins, lymphatic vessels and lymph nodes, not elsewhere classified | 18.3                    | 22.2                     | I83 Varicose veins of lower extremities                       |                  |
|                                   |                   |                   | D10-D36:Benign neoplasms                                                               | 16.2                    | 19.7                     | D25 Leiomyoma of uterus                                       |                  |
|                                   |                   |                   | M15-M19:Arthrosis                                                                      | 15.7                    | 19.1                     | M17 Gonarthrosis [arthrosis of knee]                          |                  |
| <b>WC2</b><br>121,564             | 55.8              | 23.0              | E70-E90:Metabolic disorders                                                            | 35.4                    | 63.4                     | E78 Disorders of lipoprotein metabolism and other lipidaemias | 0.93 (0.86-1.00) |
|                                   |                   |                   | I10-I15:Hypertensive diseases                                                          | 25.6                    | 45.8                     | I10 Essential (primary) hypertension                          |                  |
|                                   |                   |                   | E65-E68:Obesity and other hyperalimentation                                            | 19.0                    | 34.0                     | E66 Obesity                                                   |                  |
|                                   |                   |                   | E10-E14:Diabetes mellitus                                                              | 7.7                     | 13.7                     | E11 Non-insulin-                                              |                  |

|                       |      |      |                                                                            |      |      |                                                            |                  |
|-----------------------|------|------|----------------------------------------------------------------------------|------|------|------------------------------------------------------------|------------------|
|                       |      |      |                                                                            |      |      | dependent diabetes mellitus                                |                  |
| <b>WC3</b><br>103,147 | 47.4 | 10.8 | F10-F19:Mental and behavioural disorders due to psychoactive substance use | 18.6 | 39.4 | F17 Mental and behavioural disorders due to use of tobacco | 0.78 (0.73-0.84) |
|                       |      |      | E00-E07:Disorders of thyroid gland                                         | 14.9 | 31.4 | E03 Other hypothyroidism                                   |                  |
|                       |      |      | F30-F39:Mood [affective] disorders                                         | 14.6 | 30.8 | F32 Depressive episode                                     |                  |
|                       |      |      | M80-M85:Disorders of bone density and structure                            | 11.3 | 23.9 | M81 Osteoporosis without pathological fracture             |                  |
| <b>WC4</b><br>70,294  | 32.3 | 6.4  | J00-J06:Acute upper respiratory infections                                 | 12.6 | 39.1 | J00 Acute nasopharyngitis [common cold]                    | 0.71 (0.66-0.77) |
|                       |      |      | K00-K14:Diseases of oral cavity, salivary glands and jaws                  | 12.1 | 37.3 | K02 Dental caries                                          |                  |
|                       |      |      | L20-L30:Dermatitis and eczema                                              | 9.3  | 28.8 | L29 Pruritus                                               |                  |
|                       |      |      | B35-B49:Mycoses                                                            | 5.7  | 17.8 | B35 Dermatophytosis                                        |                  |
| <b>WC5</b><br>63,792  | 29.3 | 6.0  | K20-K31:Diseases of oesophagus, stomach and duodenum                       | 11.4 | 38.9 | K30 Dyspepsia                                              | 0.71 (0.66-0.76) |
|                       |      |      | G40-G47:Episodic and paroxysmal disorders                                  | 10.5 | 36.0 | G43 Migraine                                               |                  |
|                       |      |      | K55-K63:Other diseases of intestines                                       | 8.6  | 29.2 | K59 Other functional intestinal disorders                  |                  |
|                       |      |      | K40-K46:Hernia                                                             | 5.7  | 19.4 | K44 Diaphragmatic hernia                                   |                  |
| <b>WC6</b><br>34,707  | 15.9 | 1.6  | J30-J39:Other diseases of upper respiratory tract                          | 9.4  | 59.0 | J30 Vasomotor and allergic rhinitis                        | 1.00             |
|                       |      |      | J40-J47:Chronic lower respiratory diseases                                 | 8.2  | 51.2 | J45 Asthma                                                 |                  |
| <b>WC7</b><br>32,674  | 15.0 | 0.8  | D50-D53:Nutritional anaemias                                               | 8.3  | 55.2 | D50 Iron deficiency anaemia                                | 1.00             |
|                       |      |      | N60-N64:Disorders of breast                                                | 7.5  | 50.1 | N60 Benign mammary                                         |                  |

|                        |      |     |                                                                                               |     |       |                                                      |                  |
|------------------------|------|-----|-----------------------------------------------------------------------------------------------|-----|-------|------------------------------------------------------|------------------|
|                        |      |     |                                                                                               |     |       | dysplasia                                            |                  |
| <b>WC8</b><br>27,150   | 12.5 | 0.8 | G50-G59:Nerve, nerve root and plexus disorders                                                | 8.5 | 68.6  | G56 Mononeuropathies of upper limb                   | 0.91 (0.88-0.94) |
|                        |      |     | M65-M68:Disorders of synovium and tendon                                                      | 4.7 | 37.5  | M65 Synovitis and tenosynovitis                      |                  |
| <b>WC9</b><br>19,199   | 8.8  | 0.4 | N30-N39:Other diseases of urinary system                                                      | 5.9 | 66.7  | N39 Other disorders of urinary system                | 0.69 (0.62-0.75) |
|                        |      |     | N20-N23:Urolithiasis                                                                          | 3.4 | 38.3  | N20 Calculus of kidney and ureter                    |                  |
| <b>WC10</b><br>18,439  | 8.5  | 0.4 | H90-H95:Other disorders of ear                                                                | 6.3 | 75.0  | H91 Other hearing loss                               | 0.75 (0.70-0.80) |
|                        |      |     | H65-H75:Diseases of middle ear and mastoid                                                    | 2.5 | 30.1  | H65 Nonsuppurative otitis media                      |                  |
| <b>WC11</b><br>16,535  | 7.6  | 0.6 | M45-M49:Spondylopathies                                                                       | 4.3 | 57.1  | M47 Spondylosis                                      | 1.00             |
|                        |      |     | M40-M43:Deforming dorsopathies                                                                | 3.8 | 50.4  | M41 Scoliosis                                        |                  |
| <b>WC12</b><br>14, 335 | 6.6  | 0.4 | K80-K87:Disorders of gallbladder, biliary tract and pancreas                                  | 4.0 | 60.9  | K80 Cholelithiasis                                   | 0.83*            |
|                        |      |     | K70-K77:Diseases of liver                                                                     | 2.9 | 44.7  | K76 Other diseases of liver                          |                  |
| <b>WC13</b><br>12,320  | 5.7  | 0.0 | F50-F59:Behavioural syndromes associated with physiological disturbances and physical factors | 5.7 | 100.0 | F51 Nonorganic sleep disorders                       |                  |
| <b>WC14</b><br>10,357  | 4.8  | 0.0 | L60-L75:Disorders of skin appendages                                                          | 4.8 | 100.0 | L72 Follicular cysts of skin and subcutaneous tissue |                  |
| <b>WC15</b><br>9,555   | 4.4  | 0.0 | H53-H54:Visual disturbances and blindness                                                     | 4.4 | 100.0 | H54 Blindness and low vision                         |                  |
| <b>WC16</b><br>9,521   | 4.4  | 0.0 | I30-I52:Other forms of heart disease                                                          | 4.4 | 100.0 | I34 Nonrheumatic mitral valve disorders              |                  |
| <b>WC17</b><br>9,442   | 4.3  | 0.0 | B00-B09:Viral infections characterized by skin and mucous membrane lesions                    | 4.3 | 100.0 | B07 Viral warts                                      |                  |
| <b>WC18</b><br>8,541   | 3.9  | 0.0 | T08-T14:Injuries to unspecified part of trunk, limb or body region                            | 3.9 | 100.0 | T14 Injury of unspecified body region                |                  |

|                      |     |     |                                                                                       |     |       |                                                                    |  |
|----------------------|-----|-----|---------------------------------------------------------------------------------------|-----|-------|--------------------------------------------------------------------|--|
| <b>WC19</b><br>8,268 | 3.8 | 0.0 | H10-H13:Disorders of conjunctiva                                                      | 3.8 | 100.0 | H10 Conjunctivitis                                                 |  |
| <b>WC20</b><br>7,866 | 3.6 | 0.0 | H60-H62:Diseases of external ear                                                      | 3.6 | 100.0 | H61 Other disorders of external ear                                |  |
| <b>WC21</b><br>7,714 | 3.5 | 0.0 | H49-H52:Disorders of ocular muscles, binocular movement, accommodation and refraction | 3.5 | 100.0 | H52 Disorders of refraction and accommodation                      |  |
| <b>WC22</b><br>7,512 | 3.4 | 0.0 | L50-L54:Urticaria and erythema                                                        | 3.4 | 100.0 | L50 Urticaria                                                      |  |
| <b>WC23</b><br>7,298 | 3.4 | 0.0 | J20-J22:Other acute lower respiratory infections                                      | 3.4 | 100.0 | J20 Acute bronchitis                                               |  |
| <b>WC24</b><br>7,251 | 3.3 | 0.0 | L80-L99:Other disorders of the skin and subcutaneous tissue                           | 3.3 | 100.0 | L82 Seborrhoeic keratosis                                          |  |
| <b>WC25</b><br>6,178 | 2.8 | 0.0 | H00-H06:Disorders of eyelid, lacrimal system and orbit                                | 2.8 | 100.0 | H04 Disorders of lachrymal system                                  |  |
| <b>WC26</b><br>5,993 | 2.8 | 0.0 | H40-H42:Glaucoma                                                                      | 2.8 | 100.0 | H40 Glaucoma                                                       |  |
| <b>WC27</b><br>5,986 | 2.7 | 0.0 | A00-A09:Intestinal infectious diseases                                                | 2.7 | 100.0 | A09 Diarrhoea and gastroenteritis of presumed infectious origin    |  |
| <b>WC28</b><br>5,890 | 2.7 | 0.0 | M05-M14:Inflammatory polyarthropathies                                                | 2.7 | 100.0 | M13 Other arthritis                                                |  |
| <b>WC29</b><br>5,548 | 2.5 | 0.0 | S80-S89:Injuries to the knee and lower leg                                            | 2.5 | 100.0 | S83 Dislocation, sprain and strain of joints and ligaments of knee |  |
| <b>WC30</b><br>5,416 | 2.5 | 0.0 | C50-C50:Malignant neoplasm of breast                                                  | 2.5 | 100.0 | C50 Malignant neoplasm of breast                                   |  |
| <b>WC31</b><br>5,372 | 2.5 | 0.0 | L40-L45:Papulosquamous disorders                                                      | 2.5 | 100.0 | L40 Psoriasis                                                      |  |
| <b>WC32</b><br>5,336 | 2.4 | 0.0 | H80-H83:Diseases of inner ear                                                         | 2.4 | 100.0 | H81 Disorders of vestibular function                               |  |
| <b>WC33</b>          | 2.0 | 0.0 | S90-S99:Injuries to the ankle and                                                     | 2.0 | 100.0 | S93 Dislocation, sprain                                            |  |



|               |     |     |                                                                                                 |     |       |                                                                              |  |
|---------------|-----|-----|-------------------------------------------------------------------------------------------------|-----|-------|------------------------------------------------------------------------------|--|
| 4,374         |     |     | foot                                                                                            |     |       | and strain of joints and ligaments at ankle and foot level                   |  |
| WC34<br>3,882 | 1.8 | 0.0 | B15-B19:Viral hepatitis                                                                         | 1.8 | 100.0 | B18 Chronic viral hepatitis                                                  |  |
| WC35<br>3,758 | 1.7 | 0.0 | H25-H28:Disorders of lens                                                                       | 1.7 | 100.0 | H25 Senile cataract                                                          |  |
| WC36<br>3,744 | 1.7 | 0.0 | K50-K52:Noninfective enteritis and colitis                                                      | 1.7 | 100.0 | K52 Other non-infective gastro-enteritis and colitis                         |  |
| WC37<br>3,689 | 1.7 | 0.0 | N70-N77:Inflammatory diseases of female pelvic organs                                           | 1.7 | 100.0 | N76 Other inflammation of vagina and vulva                                   |  |
| WC38<br>3,646 | 1.7 | 0.0 | J09-J18:Influenza and pneumonia                                                                 | 1.7 | 100.0 | J11 Influenza, virus not identified                                          |  |
| WC39<br>3,399 | 1.6 | 0.0 | L00-L08:Infections of the skin and subcutaneous tissue                                          | 1.6 | 100.0 | L03 Cellulitis                                                               |  |
| WC40<br>3,284 | 1.5 | 0.0 | Q38-Q45:Other congenital malformations of the digestive system                                  | 1.5 | 100.0 | Q40 Other congenital malformations of upper alimentary tract                 |  |
| WC41<br>3,180 | 1.5 | 0.0 | D60-D64:Aplastic and other anaemias                                                             | 1.5 | 100.0 | D64 Other anaemias                                                           |  |
| WC42<br>3,055 | 1.4 | 0.0 | W50-W64:Exposure to animate mechanical forces                                                   | 1.4 | 100.0 | W57 Bitten or stung by non-venomous insect and other non-venomous arthropods |  |
| WC43<br>2,926 | 1.3 | 0.0 | Y40-Y59:Drugs, medicaments and biological substances causing adverse effects in therapeutic use | 1.3 | 100.0 | Y52 Agents primarily affecting the cardiovascular system                     |  |
| WC44<br>2,884 | 1.3 | 0.0 | B25-B34:Other viral diseases                                                                    | 1.3 | 100.0 | B34 Viral infection of unspecified site                                      |  |
| WC45<br>2,788 | 1.3 | 0.0 | E20-E35:Disorders of other endocrine glands                                                     | 1.3 | 100.0 | E28 Ovarian dysfunction                                                      |  |
| WC46<br>2,765 | 1.3 | 0.0 | S60-S69:Injuries to the wrist and hand                                                          | 1.3 | 100.0 | S61 Open wound of wrist and hand                                             |  |

|                      |      |     |                                                                       |     |       |                                                      |  |
|----------------------|------|-----|-----------------------------------------------------------------------|-----|-------|------------------------------------------------------|--|
| <b>WC47</b><br>2,645 | 1.2  | 0.0 | H55-H59:Other disorders of eye and adnexa                             | 1.2 | 100.0 | H57 Other disorders of eye and adnexa                |  |
| <b>WC48</b><br>2,612 | 1.2  | 0.0 | M60-M63:Disorders of muscles                                          | 1.2 | 100.0 | M62 Other disorders of muscle                        |  |
| <b>WC49</b><br>2,600 | 1.2  | 0.0 | H30-H36:Disorders of choroid and retina                               | 1.2 | 100.0 | H35 Other retinal disorders                          |  |
| <b>WC50</b><br>2,584 | 1.2  | 0.0 | D70-D77:Other diseases of blood and blood-forming organs              | 1.2 | 100.0 | D72 Other disorders of white blood cells             |  |
| <b>WC51</b><br>2,508 | 1.2  | 0.0 | T51-T65:Toxic effects of substances chiefly nonmedicinal as to source | 1.2 | 100.0 | T65 Toxic effect of other and unspecified substances |  |
| <b>WC52</b><br>2,309 | 1.1  | 0.0 | I70-I79:Diseases of arteries, arterioles and capillaries              | 1.1 | 100.0 | I73 Other peripheral vascular diseases               |  |
| <b>WC53</b><br>2,241 | 1.03 | 0.0 | I20-I25:Ischaemic heart diseases                                      | 1.0 | 100.0 | I25 Chronic ischaemic heart disease                  |  |

\* Standard error to large

\*\*Approximately unbiased (AU) probability-value

^ Abbreviation of sex, method and number (WC1: Women Cluster 1)

## Appendix 5. Prevalence and composition of diagnostic clusters in men aged 45-64 years (n= 191,171).

| Cluster order number, n           | Prevalence 1 .%* | Prevalence 2, %† | Blocks of diagnoses                                                                    | Prevalence in group‡, % | Prevalence in cluster, % | Most prevalent diagnoses of the block                         | AU p-value*      |
|-----------------------------------|------------------|------------------|----------------------------------------------------------------------------------------|-------------------------|--------------------------|---------------------------------------------------------------|------------------|
| <b>MC1<sup>^</sup></b><br>160,216 | 83.8             | 50.4             | E70-E90:Metabolic disorders                                                            | 42.2                    | 50.3                     | E78 Disorders of lipoprotein metabolism and other lipidaemias | 0.69 (0.64-0.75) |
|                                   |                  |                  | F10-F19:Mental and behavioural disorders due to psychoactive substance use             | 33.6                    | 40.1                     | F17 Mental and behavioural disorders due to use of tobacco    |                  |
|                                   |                  |                  | I10-I15:Hypertensive diseases                                                          | 32.5                    | 38.8                     | I10 Essential (primary) hypertension                          |                  |
|                                   |                  |                  | M50-M54:Other dorsopathies                                                             | 27.8                    | 33.2                     | M54 Dorsalgia                                                 |                  |
|                                   |                  |                  | E65-E68:Obesity and other hyperalimentation                                            | 14.6                    | 17.4                     | E66 Obesity                                                   |                  |
|                                   |                  |                  | E10-E14:Diabetes mellitus                                                              | 14.2                    | 16.9                     | E11 Non-insulin-dependent diabetes mellitus                   |                  |
| <b>MC2</b><br>110,200             | 57.6             | 24.2             | M70-M79:Other soft tissue disorders                                                    | 16.9                    | 29.3                     | M75 Shoulder lesions                                          | 0.87 (0.84-0.90) |
|                                   |                  |                  | N40-N51:Diseases of male genital organs                                                | 12.1                    | 21.0                     | N40 Hyperplasia of prostate                                   |                  |
|                                   |                  |                  | M20-M25:Other joint disorders                                                          | 12.0                    | 20.9                     | M25 Other joint disorders, not elsewhere classified           |                  |
|                                   |                  |                  | K20-K31:Diseases of oesophagus, stomach and duodenum                                   | 11.5                    | 20.0                     | K29 Gastritis and duodenitis                                  |                  |
|                                   |                  |                  | I80-I89:Diseases of veins, lymphatic vessels and lymph nodes, not elsewhere classified | 10.0                    | 17.4                     | I84 Haemorrhoids                                              |                  |
|                                   |                  |                  | K40-K46:Hernia                                                                         | 8.8                     | 15.2                     | K40 Inguinal hernia                                           |                  |

|                       |      |      |                                                                                               |      |      |                                                                     |                  |
|-----------------------|------|------|-----------------------------------------------------------------------------------------------|------|------|---------------------------------------------------------------------|------------------|
|                       |      |      | D10-D36:Benign neoplasms                                                                      | 8.6  | 14.9 | D17 Benign lipomatous neoplasm                                      |                  |
|                       |      |      | M15-M19:Arthrosis                                                                             | 7.7  | 13.4 | M17 Gonarthrosis [arthrosis of knee]                                |                  |
|                       |      |      | K55-K63:Other diseases of intestines                                                          | 6.4  | 11.1 | K62 Other diseases of anus and rectum                               |                  |
| <b>MC3</b><br>103,365 | 54.1 | 20.7 | F40-F48:Neurotic, stress-related and somatoform disorders                                     | 13.5 | 24.9 | F41 Nutritional marasmus                                            | 0.79 (0.74-0.84) |
|                       |      |      | K00-K14:Diseases of oral cavity, salivary glands and jaws                                     | 12.0 | 22.3 | K02 Dental caries                                                   |                  |
|                       |      |      | J40-J47:Chronic lower respiratory diseases                                                    | 9.3  | 17.2 | J44 Other chronic obstructive pulmonary disease                     |                  |
|                       |      |      | J00-J06:Acute upper respiratory infections                                                    | 8.9  | 16.4 | J00 Acute nasopharyngitis [common cold]                             |                  |
|                       |      |      | J30-J39:Other diseases of upper respiratory tract                                             | 8.0  | 14.8 | J30 Vasomotor and allergic rhinitis                                 |                  |
|                       |      |      | L20-L30:Dermatitis and eczema                                                                 | 7.5  | 13.9 | L21 Seborrhoeic dermatitis                                          |                  |
|                       |      |      | G40-G47:Episodic and paroxysmal disorders                                                     | 7.4  | 13.7 | G47 Sleep disorders                                                 |                  |
|                       |      |      | F50-F59:Behavioural syndromes associated with physiological disturbances and physical factors | 6.6  | 12.2 | F52 Sexual dysfunction, not caused by organic disorder or disease   |                  |
|                       |      |      | F30-F39:Mood [affective] disorders                                                            | 6.3  | 11.6 | F32 Depressive episode                                              |                  |
|                       |      |      | B35-B49:Mycoses                                                                               | 4.1  | 7.6  | B35 Dermatophytosis                                                 |                  |
| <b>MC4</b><br>48,140  | 25.2 | 4.7  | H90-H95:Other disorders of ear                                                                | 7.7  | 30.6 | H91 Disorders of sclera and cornea in diseases classified elsewhere | 0.87 (0.83-0.91) |
|                       |      |      | H53-H54:Visual disturbances and blindness                                                     | 3.9  | 15.5 | H54 Blindness and low vision                                        |                  |
|                       |      |      | B00-B09:Viral infections characterized by skin and                                            | 3.5  | 13.9 | B07 Viral warts                                                     |                  |

|                      |      |     |                                                                                       |     |      |                                                                    |                  |
|----------------------|------|-----|---------------------------------------------------------------------------------------|-----|------|--------------------------------------------------------------------|------------------|
|                      |      |     | mucous membrane lesions                                                               |     |      |                                                                    |                  |
|                      |      |     | L60-L75:Disorders of skin appendages                                                  | 3.5 | 13.9 | L72 Follicular cysts of skin and subcutaneous tissue               |                  |
|                      |      |     | H10-H13:Disorders of conjunctiva                                                      | 3.0 | 12.0 | H10 Conjunctivitis                                                 |                  |
|                      |      |     | H49-H52:Disorders of ocular muscles, binocular movement, accommodation and refraction | 2.8 | 11.2 | H52 Disorders of refraction and accommodation                      |                  |
|                      |      |     | L80-L99:Other disorders of the skin and subcutaneous tissue                           | 2.5 | 10.0 | L82 Seborrhoeic keratosis                                          |                  |
|                      |      |     | L00-L08:Infections of the skin and subcutaneous tissue                                | 2.1 | 8.3  | L02 Cutaneous abscess, furuncle and carbuncle                      |                  |
|                      |      |     | H00-H06:Disorders of eyelid, lacrimal system and orbit                                | 1.6 | 6.5  | H00 Hordeolum and chalazion                                        |                  |
| <b>MC5</b><br>30,315 | 15.9 | 2.9 | I30-I52:Other forms of heart disease                                                  | 6.9 | 43.7 | I45 Other conduction disorders                                     | 0.77 (0.73-0.82) |
|                      |      |     | I20-I25:Ischaemic heart diseases                                                      | 5.0 | 31.0 | I25 Chronic ischaemic heart disease                                |                  |
|                      |      |     | I70-I79:Diseases of arteries, arterioles and capillaries                              | 2.4 | 15.2 | I73 Other peripheral vascular diseases                             |                  |
|                      |      |     | I60-I69:Cerebrovascular diseases                                                      | 1.8 | 11.4 | I64 Stroke, not specified as haemorrhage or infarction             |                  |
|                      |      |     | H30-H36:Disorders of choroid and retina                                               | 1.7 | 11.0 | H36 Retinal disorders in diseases classified elsewhere             |                  |
|                      |      |     | N17-N19:Renal failure                                                                 | 1.5 | 9.2  | N18 Chronic renal failure                                          |                  |
| <b>MC6</b><br>29,907 | 15.6 | 1.5 | M05-M14:Inflammatory polyarthropathies                                                | 5.4 | 34.5 | M10 Gout                                                           | 0.66 (0.60-0.72) |
|                      |      |     | S80-S89:Injuries to the knee and lower leg                                            | 3.2 | 20.7 | S83 Dislocation, sprain and strain of joints and ligaments of knee |                  |

|                      |      |     |                                                                     |     |      |                                                                                    |                  |
|----------------------|------|-----|---------------------------------------------------------------------|-----|------|------------------------------------------------------------------------------------|------------------|
|                      |      |     | L40-L45: Papulosquamous disorders                                   | 3.2 | 20.5 | L40 Psoriasis                                                                      |                  |
|                      |      |     | G50-G59: Nerve, nerve root and plexus disorders                     | 2.7 | 17.4 | G56 Mononeuropathies of upper limb                                                 |                  |
|                      |      |     | M65-M68: Disorders of synovium and tendon                           | 2.6 | 16.8 | M65 Synovitis and tenosynovitis                                                    |                  |
| <b>MC7</b><br>19,313 | 10.1 | 0.9 | K70-K77: Diseases of liver                                          | 5.2 | 51.9 | K76 Other diseases of liver                                                        | 1.00             |
|                      |      |     | B15-B19: Viral hepatitis                                            | 3.2 | 32.0 | B18 Chronic viral hepatitis                                                        |                  |
|                      |      |     | K80-K87: Disorders of gallbladder, biliary tract and pancreas       | 2.6 | 25.8 | K80 Cholelithiasis                                                                 |                  |
| <b>MC8</b><br>19,160 | 10.0 | 0.7 | T08-T14: Injuries to unspecified part of trunk, limb or body region | 4.1 | 41.0 | T14 Injury of unspecified body region                                              | 0.80 (0.75-0.86) |
|                      |      |     | L50-L54: Urticaria and erythema                                     | 2.1 | 20.8 | L50 Urticaria                                                                      |                  |
|                      |      |     | S60-S69: Injuries to the wrist and hand                             | 1.9 | 18.5 | S61 Open wound of wrist and hand                                                   |                  |
|                      |      |     | S90-S99: Injuries to the ankle and foot                             | 1.4 | 13.9 | S93 Dislocation, sprain and strain of joints and ligaments at ankle and foot level |                  |
|                      |      |     | S00-S09: Injuries to the head                                       | 1.3 | 13.3 | S01 Open wound of head                                                             |                  |
| <b>MC9</b><br>13,752 | 7.2  | 0.3 | E00-E07: Disorders of thyroid gland                                 | 2.4 | 32.8 | E03 Other hypothyroidism                                                           | 0.97 (0.96-0.98) |
|                      |      |     | K50-K52: Noninfective enteritis and colitis                         | 1.7 | 24.1 | K52 Other non-infective gastro-enteritis and colitis                               |                  |
|                      |      |     | D50-D53: Nutritional anaemias                                       | 1.2 | 16.3 | D50 Iron deficiency anaemia                                                        |                  |
|                      |      |     | Q38-Q45: Other congenital malformations of the digestive system     | 1.2 | 16.2 | Q40 Other congenital malformations of upper alimentary tract                       |                  |
|                      |      |     | D70-D77: Other diseases of blood and blood-forming organs           | 1.1 | 15.3 | D72 Other disorders of white blood cells                                           |                  |
| <b>MC10</b>          | 7.1  | 0.5 | J20-J22: Other acute lower                                          | 2.6 | 37.2 | J20 Acute bronchitis                                                               | 0.86 (0.82-0.91) |

|                       |     |     |                                                                        |     |      |                                                                 |                  |
|-----------------------|-----|-----|------------------------------------------------------------------------|-----|------|-----------------------------------------------------------------|------------------|
| 13,490                |     |     | respiratory infections                                                 |     |      |                                                                 |                  |
|                       |     |     | A00-A09: Intestinal infectious diseases                                | 2.4 | 34.2 | A09 Diarrhoea and gastroenteritis of presumed infectious origin |                  |
|                       |     |     | J09-J18: Influenza and pneumonia                                       | 1.6 | 22.0 | J11 Influenza, virus not identified                             |                  |
|                       |     |     | B25-B34: Other viral diseases                                          | 1.0 | 14.6 | B34 Viral infection of unspecified site                         |                  |
| <b>MC11</b><br>13,434 | 7.0 | 0.4 | H60-H62: Diseases of external ear                                      | 3.9 | 55.3 | H61 Other disorders of external ear                             | 0.88 (0.85-0.92) |
|                       |     |     | H65-H75: Diseases of middle ear and mastoid                            | 2.1 | 30.5 | H65 Nonsuppurative otitis media                                 |                  |
|                       |     |     | H80-H83: Diseases of inner ear                                         | 1.4 | 19.9 | H81 Disorders of vestibular function                            |                  |
| <b>MC12</b><br>10,952 | 5.7 | 0.1 | N20-N23: Urolithiasis                                                  | 4.3 | 75.5 | N20 Calculus of kidney and ureter                               | 0.99 (0.98-1.00) |
|                       |     |     | N30-N39: Other diseases of urinary system                              | 1.6 | 27.1 | N39 Other disorders of urinary system                           |                  |
| <b>MC13</b><br>8,794  | 4.6 | 0.3 | M45-M49: Spondylopathies                                               | 3.1 | 66.7 | M47 Spondylosis                                                 | 0.99 (0.95-1.00) |
|                       |     |     | M40-M43: Deforming dorsopathies                                        | 1.8 | 38.9 | M41 Scoliosis                                                   |                  |
| <b>MC14</b><br>7,444  | 3.9 | 0.2 | H40-H42: Glaucoma                                                      | 2.3 | 59.6 | H40 Glaucoma                                                    | 0.91 (0.88-0.95) |
|                       |     |     | H25-H28: Disorders of lens                                             | 1.8 | 45.4 | H25 Senile cataract                                             |                  |
| <b>MC15</b><br>6,161  | 3.2 | 0.0 | T51-T65: Toxic effects of substances chiefly nonmedicinal as to source | 2.1 | 65.8 | T65 Toxic effect of other and unspecified substances            | 0.90 (0.87-0.93) |
|                       |     |     | F20-F29: Schizophrenia, schizotypal and delusional disorders           | 1.1 | 35.3 | F20 Schizophrenia                                               |                  |

\*\*Approximately unbiased (AU) probability-value

**Appendix 6.** Factors in women aged 45-64 years (n= 217,823).

| Factorial order number, n | Prevalence 1, %* | Prevalence 2, %† | Blocks of diagnoses                                      | Prevalence in group, % | Prevalence in factor, % | Variance proportion, % | Cumulative Variance proportion, % |
|---------------------------|------------------|------------------|----------------------------------------------------------|------------------------|-------------------------|------------------------|-----------------------------------|
| <b>WF1^</b><br>130,072    | 59.7             | 25.4             | M50-M54:Other dorsopathies                               | 35.8                   | 59.9                    | 10.6                   | 69.1                              |
|                           |                  |                  | M70-M79:Other soft tissue disorders                      | 27.0                   | 45.2                    |                        |                                   |
|                           |                  |                  | M15-M19:Arthrosis                                        | 15.7                   | 26.2                    |                        |                                   |
|                           |                  |                  | G50-G59:Nerve, nerve root and plexus disorders           | 8.5                    | 14.3                    |                        |                                   |
|                           |                  |                  | M45-M49:Spondylopathies                                  | 4.3                    | 7.3                     |                        |                                   |
|                           |                  |                  | M40-M43:Deforming dorsopathies                           | 3.8                    | 6.4                     |                        |                                   |
| <b>WF2</b><br>82,301      | 37.8             | 12.0             | I10-I15:Hypertensive diseases                            | 25.6                   | 67.6                    | 7.0                    | 84.5                              |
|                           |                  |                  | E65-E68:Obesity and other hyperalimination               | 19.0                   | 50.2                    |                        |                                   |
|                           |                  |                  | E10-E14:Diabetes mellitus                                | 7.7                    | 20.3                    |                        |                                   |
| <b>WF3</b><br>71,436      | 32.8             | 8.1              | I10-I15:Hypertensive diseases                            | 25.6                   | 78.0                    | 20.2                   | 58.6                              |
|                           |                  |                  | E10-E14:Diabetes mellitus                                | 7.7                    | 23.4                    |                        |                                   |
|                           |                  |                  | I30-I52:Other forms of heart disease                     | 4.4                    | 13.3                    |                        |                                   |
|                           |                  |                  | H25-H28:Disorders of lens                                | 1.7                    | 5.3                     |                        |                                   |
|                           |                  |                  | H30-H36:Disorders of choroid and retina                  | 1.2                    | 3.6                     |                        |                                   |
|                           |                  |                  | I70-I79:Diseases of arteries, arterioles and capillaries | 1.1                    | 3.2                     |                        |                                   |
|                           |                  |                  | I20-I25:Ischaemic heart diseases                         | 1.0                    | 3.1                     |                        |                                   |
| <b>WF4</b><br>60,027      | 27.6             | 5.9              | J00-J06:Acute upper respiratory infections               | 12.6                   | 45.8                    | 38.3                   | 38.3                              |
|                           |                  |                  | N30-N39:Other diseases of urinary system                 | 5.9                    | 21.3                    |                        |                                   |
|                           |                  |                  | H60-H62:Diseases of external ear                         | 3.6                    | 13.1                    |                        |                                   |
|                           |                  |                  | J20-J22:Other acute lower respiratory infections         | 3.4                    | 12.2                    |                        |                                   |
|                           |                  |                  | A00-A09:Intestinal infectious diseases                   | 2.7                    | 10.0                    |                        |                                   |
|                           |                  |                  | H65-H75:Diseases of middle ear and mastoid               | 2.5                    | 9.2                     |                        |                                   |



|                      |      |     |                                                                            |      |       |     |       |
|----------------------|------|-----|----------------------------------------------------------------------------|------|-------|-----|-------|
|                      |      |     | J09-J18:Influenza and pneumonia                                            | 1.7  | 6.1   |     |       |
|                      |      |     | B25-B34:Other viral diseases                                               | 1.3  | 4.8   |     |       |
|                      |      |     | M60-M63:Disorders of muscles                                               | 1.2  | 4.4   |     |       |
| <b>WF5</b><br>56,671 | 26.0 | 5.3 | L20-L30:Dermatitis and eczema                                              | 9.3  | 35.7  | 8.4 | 77.5  |
|                      |      |     | B35-B49:Mycoses                                                            | 5.7  | 22.1  |     |       |
|                      |      |     | L60-L75:Disorders of skin appendages                                       | 4.8  | 18.3  |     |       |
|                      |      |     | H53-H54:Visual disturbances and blindness                                  | 4.4  | 16.9  |     |       |
|                      |      |     | H10-H13:Disorders of conjunctiva                                           | 3.8  | 14.6  |     |       |
|                      |      |     | L80-L99:Other disorders of the skin and subcutaneous tissue                | 3.3  | 12.8  |     |       |
|                      |      |     | H55-H59:Other disorders of eye and adnexa                                  | 1.2  | 4.7   |     |       |
| <b>WF6</b><br>46,391 | 21.3 | 3.8 | K20-K31:Diseases of oesophagus, stomach and duodenum                       | 11.4 | 53.6  | 5.9 | 90.4  |
|                      |      |     | K40-K46:Hernia                                                             | 5.7  | 26.7  |     |       |
|                      |      |     | K80-K87:Disorders of gallbladder, biliary tract and pancreas               | 4.0  | 18.8  |     |       |
|                      |      |     | K70-K77:Diseases of liver                                                  | 2.9  | 13.8  |     |       |
|                      |      |     | Q38-Q45:Other congenital malformations of the digestive system             | 1.5  | 7.1   |     |       |
| <b>WF7</b><br>41,492 | 19.0 | 0.6 | M80-M85:Disorders of bone density and structure                            | 11.3 | 59.5  | 5.1 | 95.5  |
|                      |      |     | D50-D53:Nutritional anaemias                                               | 8.3  | 43.5  |     |       |
| <b>WF8</b><br>40,619 | 18.6 | 0.0 | F10-F19:Mental and behavioural disorders due to psychoactive substance use | 18.6 | 100.0 | 4.3 | 99.8  |
| <b>WF9</b><br>23,729 | 10.9 | 0.6 | J40-J47:Chronic lower respiratory diseases                                 | 8.2  | 74.9  | 4.1 | 103.9 |
|                      |      |     | J20-J22:Other acute lower respiratory infections                           | 3.4  | 30.8  |     |       |

\*Individuals from  $\geq 1$  diagnosis in the factor/ † Individuals from with  $\geq 2$  diagnosis in the factor

^ Abbreviation of sex, method and number (WF1: Women Factor 1)

## Appendix 7. Factors in men aged 45-64 years (n= 191,171).

| Factorial order number, n         | Prevalence 1, %* | Prevalence 2, %† | Blocks of diagnoses                                                        | Prevalence in age, % | Prevalence in factor, % | Variance proportion, % | Cumulative Variance proportion, % |
|-----------------------------------|------------------|------------------|----------------------------------------------------------------------------|----------------------|-------------------------|------------------------|-----------------------------------|
| <b>MF1<sup>^</sup></b><br>118,037 | 61.7             | 26.1             | E70-E90:Metabolic disorders                                                | 42.2                 | 68.3                    | 5.1                    | 94.8                              |
|                                   |                  |                  | I10-I15:Hypertensive diseases                                              | 32.6                 | 52.7                    |                        |                                   |
|                                   |                  |                  | E65-E68:Obesity and other hyperalimentation                                | 14.6                 | 23.6                    |                        |                                   |
|                                   |                  |                  | M05-M14:Inflammatory polyarthropathies                                     | 5.4                  | 8.7                     |                        |                                   |
| <b>MF2</b><br>75,315              | 39.4             | 8.7              | I10-I15:Hypertensive diseases                                              | 32.5                 | 82.6                    | 28.5                   | 28.5                              |
|                                   |                  |                  | I30-I52:Other forms of heart disease                                       | 6.9                  | 17.6                    |                        |                                   |
|                                   |                  |                  | I20-I25:Ischaemic heart diseases                                           | 5.0                  | 12.6                    |                        |                                   |
|                                   |                  |                  | I70-I79:Diseases of arteries, arterioles and capillaries                   | 2.4                  | 6.1                     |                        |                                   |
|                                   |                  |                  | I60-I69:Cerebrovascular diseases                                           | 1.8                  | 4.6                     |                        |                                   |
|                                   |                  |                  | N17-N19:Renal failure                                                      | 1.5                  | 3.7                     |                        |                                   |
| <b>MF3</b><br>73,638              | 38.5             | 4.4              | F10-F19:Mental and behavioural disorders due to psychoactive substance use | 33.6                 | 87.2                    | 5.3                    | 89.6                              |
|                                   |                  |                  | K70-K77:Diseases of liver                                                  | 5.2                  | 13.6                    |                        |                                   |
|                                   |                  |                  | B15-B19:Viral hepatitis                                                    | 3.2                  | 8.4                     |                        |                                   |
|                                   |                  |                  | F20-F29:Schizophrenia, schizotypal and delusional disorders                | 1.1                  | 2.9                     |                        |                                   |
| <b>MF4</b><br>66,303              | 34.7             | 5.1              | M50-M54:Other dorsopathies                                                 | 27.8                 | 80.2                    | 7.3                    | 77.8                              |
|                                   |                  |                  | M15-M19:Arthrosis                                                          | 7.7                  | 22.2                    |                        |                                   |
|                                   |                  |                  | M45-M49:Spondylopathies                                                    | 3.1                  | 8.8                     |                        |                                   |
|                                   |                  |                  | M40-M43:Deforming dorsopathies                                             | 1.8                  | 5.2                     |                        |                                   |
| <b>MF5</b><br>34,903              | 18.3             | 2.5              | L20-L30:Dermatitis and eczema                                              | 7.5                  | 41.3                    | 22.2                   | 50.7                              |
|                                   |                  |                  | B35-B49:Mycoses                                                            | 4.1                  | 22.5                    |                        |                                   |
|                                   |                  |                  | H53-H54:Visual disturbances and                                            | 3.9                  | 21.3                    |                        |                                   |

|                      |      |     |                                                                    |      |       |      |       |
|----------------------|------|-----|--------------------------------------------------------------------|------|-------|------|-------|
|                      |      |     | blindness                                                          |      |       |      |       |
|                      |      |     | H10-H13:Disorders of conjunctiva                                   | 3.0  | 16.6  |      |       |
|                      |      |     | L80-L99:Other disorders of the skin and subcutaneous tissue        | 2.5  | 13.8  |      |       |
| <b>MF6</b><br>27,697 | 14.5 | 1.8 | J00-J06:Acute upper respiratory infections                         | 8.9  | 61.3  | 10.4 | 61.0  |
|                      |      |     | J20-J22:Other acute lower respiratory infections                   | 2.6  | 18.1  |      |       |
|                      |      |     | A00-A09:Intestinal infectious diseases                             | 2.4  | 16.7  |      |       |
|                      |      |     | J09-J18:Influenza and pneumonia                                    | 1.6  | 10.7  |      |       |
|                      |      |     | B25-B34:Other viral diseases                                       | 1.0  | 7.1   |      |       |
| <b>MF7</b><br>33,568 | 17.6 | 2.2 | E10-E14:Diabetes mellitus                                          | 14.2 | 80.8  | 9.5  | 70.5  |
|                      |      |     | H40-H42:Glaucoma                                                   | 2.3  | 13.2  |      |       |
|                      |      |     | H25-H28:Disorders of lens                                          | 1.8  | 10.1  |      |       |
|                      |      |     | H30-H36:Disorders of choroid and retina                            | 1.7  | 10.0  |      |       |
| <b>MF8</b><br>25,121 | 13.1 | 0.7 | K20-K31:Diseases of oesophagus, stomach and duodenum               | 11.5 | 87.8  | 6.5  | 84.3  |
|                      |      |     | D50-D53:Nutritional anaemias                                       | 1.2  | 8.9   |      |       |
|                      |      |     | Q38-Q45:Other congenital malformations of the digestive system     | 1.2  | 8.9   |      |       |
| <b>MF9</b><br>15,974 | 8.4  | 0.4 | T08-T14:Injuries to unspecified part of trunk, limb or body region | 4.1  | 49.2  | 5.0  | 99.8  |
|                      |      |     | S80-S89:Injuries to the knee and lower leg                         | 3.3  | 38.7  |      |       |
|                      |      |     | S90-S99:Injuries to the ankle and foot                             | 1.4  | 16.7  |      |       |
| <b>MF10</b><br>8,271 | 4.3  | 0.0 | N20-N23:Urolithiasis                                               | 4.3  | 100.0 | 3.9  | 103.7 |

\*Individuals from  $\geq 1$  diagnosis in the factor/ † Individuals from with  $\geq 2$  diagnosis in the factor

^ Abbreviation of sex, method and number (MF1: Men Factor 1)

**STROBE 2007 (v4) Statement—Checklist of items that should be included in reports of *cross-sectional studies***

| Section/Topic                | Item # | Recommendation                                                                                                                                                                       | Reported on page # |
|------------------------------|--------|--------------------------------------------------------------------------------------------------------------------------------------------------------------------------------------|--------------------|
| <b>Title and abstract</b>    | 1      | (a) Indicate the study's design with a commonly used term in the title or the abstract                                                                                               | 1                  |
|                              |        | (b) Provide in the abstract an informative and balanced summary of what was done and what was found                                                                                  | 2                  |
| <b>Introduction</b>          |        |                                                                                                                                                                                      |                    |
| Background/rationale         | 2      | Explain the scientific background and rationale for the investigation being reported                                                                                                 | 4                  |
| Objectives                   | 3      | State specific objectives, including any prespecified hypotheses                                                                                                                     | 5                  |
| <b>Methods</b>               |        |                                                                                                                                                                                      |                    |
| Study design                 | 4      | Present key elements of study design early in the paper                                                                                                                              | 5                  |
| Setting                      | 5      | Describe the setting, locations, and relevant dates, including periods of recruitment, exposure, follow-up, and data collection                                                      | 5                  |
| Participants                 | 6      | (a) Give the eligibility criteria, and the sources and methods of selection of participants                                                                                          | 5                  |
| Variables                    | 7      | Clearly define all outcomes, exposures, predictors, potential confounders, and effect modifiers. Give diagnostic criteria, if applicable                                             | 6                  |
| Data sources/<br>measurement | 8*     | For each variable of interest, give sources of data and details of methods of assessment (measurement). Describe comparability of assessment methods if there is more than one group | 6-8                |
| Bias                         | 9      | Describe any efforts to address potential sources of bias                                                                                                                            | -                  |
| Study size                   | 10     | Explain how the study size was arrived at                                                                                                                                            | 5                  |
| Quantitative variables       | 11     | Explain how quantitative variables were handled in the analyses. If applicable, describe which groupings were chosen and why                                                         |                    |
| Statistical methods          | 12     | (a) Describe all statistical methods, including those used to control for confounding                                                                                                | 6                  |
|                              |        | (b) Describe any methods used to examine subgroups and interactions                                                                                                                  | 6                  |
|                              |        | (c) Explain how missing data were addressed                                                                                                                                          | 6-9                |
|                              |        | (d) If applicable, describe analytical methods taking account of sampling strategy                                                                                                   | 6-9                |
|                              |        | (e) Describe any sensitivity analyses                                                                                                                                                | 6-9                |
| <b>Results</b>               |        |                                                                                                                                                                                      |                    |

|                          |     |                                                                                                                                                                                                              |                               |
|--------------------------|-----|--------------------------------------------------------------------------------------------------------------------------------------------------------------------------------------------------------------|-------------------------------|
| Participants             | 13* | (a) Report numbers of individuals at each stage of study—eg numbers potentially eligible, examined for eligibility, confirmed eligible, included in the study, completing follow-up, and analysed            | 10                            |
|                          |     | (b) Give reasons for non-participation at each stage                                                                                                                                                         | 10                            |
|                          |     | (c) Consider use of a flow diagram                                                                                                                                                                           | Supplementary File Appendix 1 |
| Descriptive data         | 14* | (a) Give characteristics of study participants (eg demographic, clinical, social) and information on exposures and potential confounders                                                                     | Table 1                       |
|                          |     | (b) Indicate number of participants with missing data for each variable of interest                                                                                                                          | Tables                        |
| Outcome data             | 15* | Report numbers of outcome events or summary measures                                                                                                                                                         | Tables                        |
| Main results             | 16  | (a) Give unadjusted estimates and, if applicable, confounder-adjusted estimates and their precision (eg, 95% confidence interval). Make clear which confounders were adjusted for and why they were included | Tables 2 and 3.               |
|                          |     | (b) Report category boundaries when continuous variables were categorized                                                                                                                                    | -                             |
|                          |     | (c) If relevant, consider translating estimates of relative risk into absolute risk for a meaningful time period                                                                                             | -                             |
| Other analyses           | 17  | Report other analyses done—eg analyses of subgroups and interactions, and sensitivity analyses                                                                                                               | -                             |
| <b>Discussion</b>        |     |                                                                                                                                                                                                              |                               |
| Key results              | 18  | Summarise key results with reference to study objectives                                                                                                                                                     | 23                            |
| Limitations              | 19  | Discuss limitations of the study, taking into account sources of potential bias or imprecision. Discuss both direction and magnitude of any potential bias                                                   | 20-21                         |
| Interpretation           | 20  | Give a cautious overall interpretation of results considering objectives, limitations, multiplicity of analyses, results from similar studies, and other relevant evidence                                   | 19                            |
| Generalisability         | 21  | Discuss the generalisability (external validity) of the study results                                                                                                                                        | 20                            |
| <b>Other information</b> |     |                                                                                                                                                                                                              |                               |
| Funding                  | 22  | Give the source of funding and the role of the funders for the present study and, if applicable, for the original study on which the present article is based                                                | 23                            |

\*Give information separately for cases and controls in case-control studies and, if applicable, for exposed and unexposed groups in cohort and cross-sectional studies.

**Note:** An Explanation and Elaboration article discusses each checklist item and gives methodological background and published examples of transparent reporting. The STROBE checklist is best used in conjunction with this article (freely available on the Web sites of PLoS Medicine at <http://www.plosmedicine.org/>, Annals of Internal Medicine at <http://www.annals.org/>, and Epidemiology at <http://www.epidem.com/>). Information on the STROBE Initiative is available at [www.strobe-statement.org](http://www.strobe-statement.org).
