# Supplementary material for: Comparative analysis of methods for identifying multimorbidity patterns: a study of ‘real-world’ data
Source: PubMed Central journal article supplement — BMJ Open. 2018 Mar 22;8(3):e018986. doi: 10.1136/bmjopen-2017-018986 (PMC5875653; doi:10.1136/bmjopen-2017-018986), 2018-03-22

**Appendix 3.** Cluster dendrogram in men aged 45-64 years, with approximately unbiased (AU) probability value.

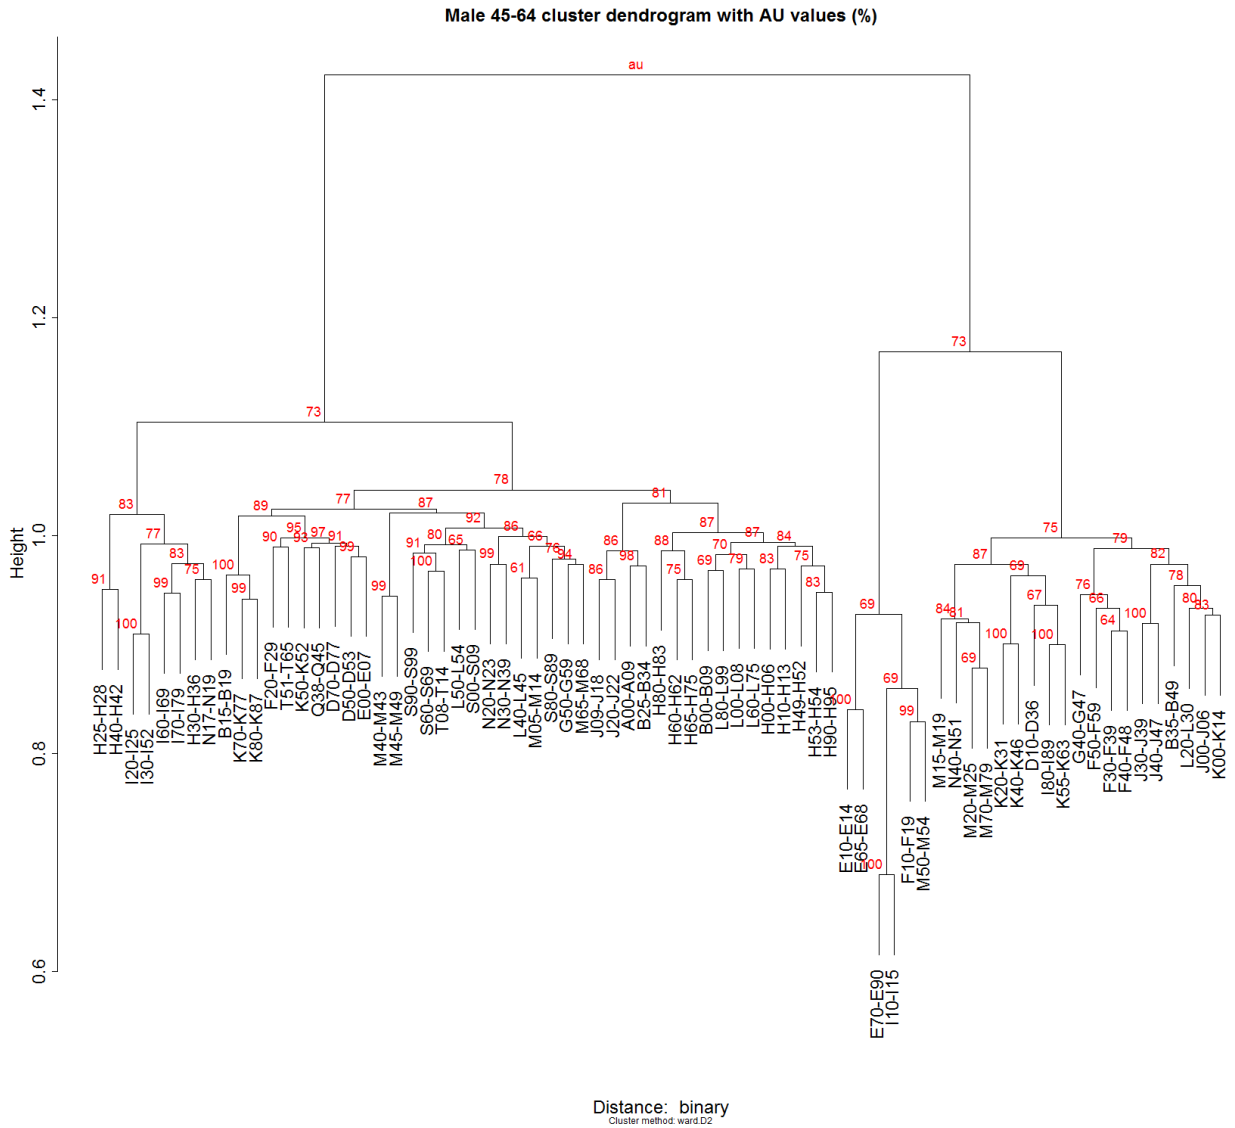

Supplement: bmjopen-2017-018986supp003.pdf [file bmjopen-2017-018986supp003.pdf]
