# Supplementary material for: Comparative analysis of methods for identifying multimorbidity patterns: a study of ‘real-world’ data
Source: PubMed Central journal article supplement — BMJ Open. 2018 Mar 22;8(3):e018986. doi: 10.1136/bmjopen-2017-018986 (PMC5875653; doi:10.1136/bmjopen-2017-018986), 2018-03-22
Supplement: bmjopen-2017-018986supp004.pdf [file bmjopen-2017-018986supp004.pdf]

**Appendix 4.** Prevalence and composition of diagnostic clusters in women aged 45-64 years (n= 217,823).

| Cluster order number, n           | Prevalence 1 (%)* | Prevalence 2 (%)† | Blocks of diagnoses                                                                    | Prevalence in group‡, % | Prevalence in cluster, % | Most prevalent diagnoses of the block                         | AU p-value**     |
|-----------------------------------|-------------------|-------------------|----------------------------------------------------------------------------------------|-------------------------|--------------------------|---------------------------------------------------------------|------------------|
| <b>WC1<sup>^</sup></b><br>178,849 | 82.1              | 52.9              | M50-M54:Other dorsopathies                                                             | 35.8                    | 43.5                     | M54 Dorsalgia                                                 | 0.79 (0.74-0.85) |
|                                   |                   |                   | F40-F48:Neurotic, stress-related and somatoform disorders                              | 27.3                    | 33.2                     | F41 Other anxiety disorders                                   |                  |
|                                   |                   |                   | M70-M79:Other soft tissue disorders                                                    | 27.0                    | 32.8                     | M79 Other soft tissue disorders, not elsewhere classified     |                  |
|                                   |                   |                   | N80-N98:Noninflammatory disorders of female genital tract                              | 24.2                    | 29.5                     | N95 Menopausal and other perimenopausal disorders             |                  |
|                                   |                   |                   | M20-M25:Other joint disorders                                                          | 18.6                    | 22.6                     | M25 Other joint disorders, not elsewhere classified           |                  |
|                                   |                   |                   | I80-I89:Diseases of veins, lymphatic vessels and lymph nodes, not elsewhere classified | 18.3                    | 22.2                     | I83 Varicose veins of lower extremities                       |                  |
|                                   |                   |                   | D10-D36:Benign neoplasms                                                               | 16.2                    | 19.7                     | D25 Leiomyoma of uterus                                       |                  |
|                                   |                   |                   | M15-M19:Arthrosis                                                                      | 15.7                    | 19.1                     | M17 Gonarthrosis [arthrosis of knee]                          |                  |
| <b>WC2</b><br>121,564             | 55.8              | 23.0              | E70-E90:Metabolic disorders                                                            | 35.4                    | 63.4                     | E78 Disorders of lipoprotein metabolism and other lipidaemias | 0.93 (0.86-1.00) |
|                                   |                   |                   | I10-I15:Hypertensive diseases                                                          | 25.6                    | 45.8                     | I10 Essential (primary) hypertension                          |                  |
|                                   |                   |                   | E65-E68:Obesity and other hyperalimentation                                            | 19.0                    | 34.0                     | E66 Obesity                                                   |                  |
|                                   |                   |                   | E10-E14:Diabetes mellitus                                                              | 7.7                     | 13.7                     | E11 Non-insulin-                                              |                  |

|                       |      |      |                                                                            |      |      |                                                            |                  |
|-----------------------|------|------|----------------------------------------------------------------------------|------|------|------------------------------------------------------------|------------------|
|                       |      |      |                                                                            |      |      | dependent diabetes mellitus                                |                  |
| <b>WC3</b><br>103,147 | 47.4 | 10.8 | F10-F19:Mental and behavioural disorders due to psychoactive substance use | 18.6 | 39.4 | F17 Mental and behavioural disorders due to use of tobacco | 0.78 (0.73-0.84) |
|                       |      |      | E00-E07:Disorders of thyroid gland                                         | 14.9 | 31.4 | E03 Other hypothyroidism                                   |                  |
|                       |      |      | F30-F39:Mood [affective] disorders                                         | 14.6 | 30.8 | F32 Depressive episode                                     |                  |
|                       |      |      | M80-M85:Disorders of bone density and structure                            | 11.3 | 23.9 | M81 Osteoporosis without pathological fracture             |                  |
| <b>WC4</b><br>70,294  | 32.3 | 6.4  | J00-J06:Acute upper respiratory infections                                 | 12.6 | 39.1 | J00 Acute nasopharyngitis [common cold]                    | 0.71 (0.66-0.77) |
|                       |      |      | K00-K14:Diseases of oral cavity, salivary glands and jaws                  | 12.1 | 37.3 | K02 Dental caries                                          |                  |
|                       |      |      | L20-L30:Dermatitis and eczema                                              | 9.3  | 28.8 | L29 Pruritus                                               |                  |
|                       |      |      | B35-B49:Mycoses                                                            | 5.7  | 17.8 | B35 Dermatophytosis                                        |                  |
| <b>WC5</b><br>63,792  | 29.3 | 6.0  | K20-K31:Diseases of oesophagus, stomach and duodenum                       | 11.4 | 38.9 | K30 Dyspepsia                                              | 0.71 (0.66-0.76) |
|                       |      |      | G40-G47:Episodic and paroxysmal disorders                                  | 10.5 | 36.0 | G43 Migraine                                               |                  |
|                       |      |      | K55-K63:Other diseases of intestines                                       | 8.6  | 29.2 | K59 Other functional intestinal disorders                  |                  |
|                       |      |      | K40-K46:Hernia                                                             | 5.7  | 19.4 | K44 Diaphragmatic hernia                                   |                  |
| <b>WC6</b><br>34,707  | 15.9 | 1.6  | J30-J39:Other diseases of upper respiratory tract                          | 9.4  | 59.0 | J30 Vasomotor and allergic rhinitis                        | 1.00             |
|                       |      |      | J40-J47:Chronic lower respiratory diseases                                 | 8.2  | 51.2 | J45 Asthma                                                 |                  |
| <b>WC7</b><br>32,674  | 15.0 | 0.8  | D50-D53:Nutritional anaemias                                               | 8.3  | 55.2 | D50 Iron deficiency anaemia                                | 1.00             |
|                       |      |      | N60-N64:Disorders of breast                                                | 7.5  | 50.1 | N60 Benign mammary                                         |                  |

|                        |      |     |                                                                                               |     |       |                                                      |                  |
|------------------------|------|-----|-----------------------------------------------------------------------------------------------|-----|-------|------------------------------------------------------|------------------|
|                        |      |     |                                                                                               |     |       | dysplasia                                            |                  |
| <b>WC8</b><br>27,150   | 12.5 | 0.8 | G50-G59:Nerve, nerve root and plexus disorders                                                | 8.5 | 68.6  | G56 Mononeuropathies of upper limb                   | 0.91 (0.88-0.94) |
|                        |      |     | M65-M68:Disorders of synovium and tendon                                                      | 4.7 | 37.5  | M65 Synovitis and tenosynovitis                      |                  |
| <b>WC9</b><br>19,199   | 8.8  | 0.4 | N30-N39:Other diseases of urinary system                                                      | 5.9 | 66.7  | N39 Other disorders of urinary system                | 0.69 (0.62-0.75) |
|                        |      |     | N20-N23:Urolithiasis                                                                          | 3.4 | 38.3  | N20 Calculus of kidney and ureter                    |                  |
| <b>WC10</b><br>18,439  | 8.5  | 0.4 | H90-H95:Other disorders of ear                                                                | 6.3 | 75.0  | H91 Other hearing loss                               | 0.75 (0.70-0.80) |
|                        |      |     | H65-H75:Diseases of middle ear and mastoid                                                    | 2.5 | 30.1  | H65 Nonsuppurative otitis media                      |                  |
| <b>WC11</b><br>16,535  | 7.6  | 0.6 | M45-M49:Spondylopathies                                                                       | 4.3 | 57.1  | M47 Spondylosis                                      | 1.00             |
|                        |      |     | M40-M43:Deforming dorsopathies                                                                | 3.8 | 50.4  | M41 Scoliosis                                        |                  |
| <b>WC12</b><br>14, 335 | 6.6  | 0.4 | K80-K87:Disorders of gallbladder, biliary tract and pancreas                                  | 4.0 | 60.9  | K80 Cholelithiasis                                   | 0.83*            |
|                        |      |     | K70-K77:Diseases of liver                                                                     | 2.9 | 44.7  | K76 Other diseases of liver                          |                  |
| <b>WC13</b><br>12,320  | 5.7  | 0.0 | F50-F59:Behavioural syndromes associated with physiological disturbances and physical factors | 5.7 | 100.0 | F51 Nonorganic sleep disorders                       |                  |
| <b>WC14</b><br>10,357  | 4.8  | 0.0 | L60-L75:Disorders of skin appendages                                                          | 4.8 | 100.0 | L72 Follicular cysts of skin and subcutaneous tissue |                  |
| <b>WC15</b><br>9,555   | 4.4  | 0.0 | H53-H54:Visual disturbances and blindness                                                     | 4.4 | 100.0 | H54 Blindness and low vision                         |                  |
| <b>WC16</b><br>9,521   | 4.4  | 0.0 | I30-I52:Other forms of heart disease                                                          | 4.4 | 100.0 | I34 Nonrheumatic mitral valve disorders              |                  |
| <b>WC17</b><br>9,442   | 4.3  | 0.0 | B00-B09:Viral infections characterized by skin and mucous membrane lesions                    | 4.3 | 100.0 | B07 Viral warts                                      |                  |
| <b>WC18</b><br>8,541   | 3.9  | 0.0 | T08-T14:Injuries to unspecified part of trunk, limb or body region                            | 3.9 | 100.0 | T14 Injury of unspecified body region                |                  |

|                      |     |     |                                                                                       |     |       |                                                                    |  |
|----------------------|-----|-----|---------------------------------------------------------------------------------------|-----|-------|--------------------------------------------------------------------|--|
| <b>WC19</b><br>8,268 | 3.8 | 0.0 | H10-H13:Disorders of conjunctiva                                                      | 3.8 | 100.0 | H10 Conjunctivitis                                                 |  |
| <b>WC20</b><br>7,866 | 3.6 | 0.0 | H60-H62:Diseases of external ear                                                      | 3.6 | 100.0 | H61 Other disorders of external ear                                |  |
| <b>WC21</b><br>7,714 | 3.5 | 0.0 | H49-H52:Disorders of ocular muscles, binocular movement, accommodation and refraction | 3.5 | 100.0 | H52 Disorders of refraction and accommodation                      |  |
| <b>WC22</b><br>7,512 | 3.4 | 0.0 | L50-L54:Urticaria and erythema                                                        | 3.4 | 100.0 | L50 Urticaria                                                      |  |
| <b>WC23</b><br>7,298 | 3.4 | 0.0 | J20-J22:Other acute lower respiratory infections                                      | 3.4 | 100.0 | J20 Acute bronchitis                                               |  |
| <b>WC24</b><br>7,251 | 3.3 | 0.0 | L80-L99:Other disorders of the skin and subcutaneous tissue                           | 3.3 | 100.0 | L82 Seborrhoeic keratosis                                          |  |
| <b>WC25</b><br>6,178 | 2.8 | 0.0 | H00-H06:Disorders of eyelid, lacrimal system and orbit                                | 2.8 | 100.0 | H04 Disorders of lachrymal system                                  |  |
| <b>WC26</b><br>5,993 | 2.8 | 0.0 | H40-H42:Glaucoma                                                                      | 2.8 | 100.0 | H40 Glaucoma                                                       |  |
| <b>WC27</b><br>5,986 | 2.7 | 0.0 | A00-A09:Intestinal infectious diseases                                                | 2.7 | 100.0 | A09 Diarrhoea and gastro-enteritis of presumed infectious origin   |  |
| <b>WC28</b><br>5,890 | 2.7 | 0.0 | M05-M14:Inflammatory polyarthropathies                                                | 2.7 | 100.0 | M13 Other arthritis                                                |  |
| <b>WC29</b><br>5,548 | 2.5 | 0.0 | S80-S89:Injuries to the knee and lower leg                                            | 2.5 | 100.0 | S83 Dislocation, sprain and strain of joints and ligaments of knee |  |
| <b>WC30</b><br>5,416 | 2.5 | 0.0 | C50-C50:Malignant neoplasm of breast                                                  | 2.5 | 100.0 | C50 Malignant neoplasm of breast                                   |  |
| <b>WC31</b><br>5,372 | 2.5 | 0.0 | L40-L45:Papulosquamous disorders                                                      | 2.5 | 100.0 | L40 Psoriasis                                                      |  |
| <b>WC32</b><br>5,336 | 2.4 | 0.0 | H80-H83:Diseases of inner ear                                                         | 2.4 | 100.0 | H81 Disorders of vestibular function                               |  |
| <b>WC33</b>          | 2.0 | 0.0 | S90-S99:Injuries to the ankle and                                                     | 2.0 | 100.0 | S93 Dislocation, sprain                                            |  |

|               |     |     |                                                                                                 |     |       |                                                                              |  |
|---------------|-----|-----|-------------------------------------------------------------------------------------------------|-----|-------|------------------------------------------------------------------------------|--|
| 4,374         |     |     | foot                                                                                            |     |       | and strain of joints and ligaments at ankle and foot level                   |  |
| WC34<br>3,882 | 1.8 | 0.0 | B15-B19:Viral hepatitis                                                                         | 1.8 | 100.0 | B18 Chronic viral hepatitis                                                  |  |
| WC35<br>3,758 | 1.7 | 0.0 | H25-H28:Disorders of lens                                                                       | 1.7 | 100.0 | H25 Senile cataract                                                          |  |
| WC36<br>3,744 | 1.7 | 0.0 | K50-K52:Noninfective enteritis and colitis                                                      | 1.7 | 100.0 | K52 Other non-infective gastro-enteritis and colitis                         |  |
| WC37<br>3,689 | 1.7 | 0.0 | N70-N77:Inflammatory diseases of female pelvic organs                                           | 1.7 | 100.0 | N76 Other inflammation of vagina and vulva                                   |  |
| WC38<br>3,646 | 1.7 | 0.0 | J09-J18:Influenza and pneumonia                                                                 | 1.7 | 100.0 | J11 Influenza, virus not identified                                          |  |
| WC39<br>3,399 | 1.6 | 0.0 | L00-L08:Infections of the skin and subcutaneous tissue                                          | 1.6 | 100.0 | L03 Cellulitis                                                               |  |
| WC40<br>3,284 | 1.5 | 0.0 | Q38-Q45:Other congenital malformations of the digestive system                                  | 1.5 | 100.0 | Q40 Other congenital malformations of upper alimentary tract                 |  |
| WC41<br>3,180 | 1.5 | 0.0 | D60-D64:Aplastic and other anaemias                                                             | 1.5 | 100.0 | D64 Other anaemias                                                           |  |
| WC42<br>3,055 | 1.4 | 0.0 | W50-W64:Exposure to animate mechanical forces                                                   | 1.4 | 100.0 | W57 Bitten or stung by non-venomous insect and other non-venomous arthropods |  |
| WC43<br>2,926 | 1.3 | 0.0 | Y40-Y59:Drugs, medicaments and biological substances causing adverse effects in therapeutic use | 1.3 | 100.0 | Y52 Agents primarily affecting the cardiovascular system                     |  |
| WC44<br>2,884 | 1.3 | 0.0 | B25-B34:Other viral diseases                                                                    | 1.3 | 100.0 | B34 Viral infection of unspecified site                                      |  |
| WC45<br>2,788 | 1.3 | 0.0 | E20-E35:Disorders of other endocrine glands                                                     | 1.3 | 100.0 | E28 Ovarian dysfunction                                                      |  |
| WC46<br>2,765 | 1.3 | 0.0 | S60-S69:Injuries to the wrist and hand                                                          | 1.3 | 100.0 | S61 Open wound of wrist and hand                                             |  |

|                      |      |     |                                                                       |     |       |                                                      |  |
|----------------------|------|-----|-----------------------------------------------------------------------|-----|-------|------------------------------------------------------|--|
| <b>WC47</b><br>2,645 | 1.2  | 0.0 | H55-H59:Other disorders of eye and adnexa                             | 1.2 | 100.0 | H57 Other disorders of eye and adnexa                |  |
| <b>WC48</b><br>2,612 | 1.2  | 0.0 | M60-M63:Disorders of muscles                                          | 1.2 | 100.0 | M62 Other disorders of muscle                        |  |
| <b>WC49</b><br>2,600 | 1.2  | 0.0 | H30-H36:Disorders of choroid and retina                               | 1.2 | 100.0 | H35 Other retinal disorders                          |  |
| <b>WC50</b><br>2,584 | 1.2  | 0.0 | D70-D77:Other diseases of blood and blood-forming organs              | 1.2 | 100.0 | D72 Other disorders of white blood cells             |  |
| <b>WC51</b><br>2,508 | 1.2  | 0.0 | T51-T65:Toxic effects of substances chiefly nonmedicinal as to source | 1.2 | 100.0 | T65 Toxic effect of other and unspecified substances |  |
| <b>WC52</b><br>2,309 | 1.1  | 0.0 | I70-I79:Diseases of arteries, arterioles and capillaries              | 1.1 | 100.0 | I73 Other peripheral vascular diseases               |  |
| <b>WC53</b><br>2,241 | 1.03 | 0.0 | I20-I25:Ischaemic heart diseases                                      | 1.0 | 100.0 | I25 Chronic ischaemic heart disease                  |  |

\* Standard error to large

\*\*Approximately unbiased (AU) probability-value

^ Abbreviation of sex, method and number (WC1: Women Cluster 1)
