# Supplementary material for: Comparative analysis of methods for identifying multimorbidity patterns: a study of ‘real-world’ data
Source: PubMed Central journal article supplement — BMJ Open. 2018 Mar 22;8(3):e018986. doi: 10.1136/bmjopen-2017-018986 (PMC5875653; doi:10.1136/bmjopen-2017-018986), 2018-03-22
Supplement: bmjopen-2017-018986supp005.pdf [file bmjopen-2017-018986supp005.pdf]

**Appendix 5.** Prevalence and composition of diagnostic clusters in men aged 45-64 years (n= 191,171).

| Cluster order number, n | Prevalence 1 .%* | Prevalence 2, %† | Blocks of diagnoses                                                                    | Prevalence in group‡, % | Prevalence in cluster, % | Most prevalent diagnoses of the block                         | AU p-value*      |
|-------------------------|------------------|------------------|----------------------------------------------------------------------------------------|-------------------------|--------------------------|---------------------------------------------------------------|------------------|
| <b>MC1^</b><br>160,216  | 83.8             | 50.4             | E70-E90:Metabolic disorders                                                            | 42.2                    | 50.3                     | E78 Disorders of lipoprotein metabolism and other lipidaemias | 0.69 (0.64-0.75) |
|                         |                  |                  | F10-F19:Mental and behavioural disorders due to psychoactive substance use             | 33.6                    | 40.1                     | F17 Mental and behavioural disorders due to use of tobacco    |                  |
|                         |                  |                  | I10-I15:Hypertensive diseases                                                          | 32.5                    | 38.8                     | I10 Essential (primary) hypertension                          |                  |
|                         |                  |                  | M50-M54:Other dorsopathies                                                             | 27.8                    | 33.2                     | M54 Dorsalgia                                                 |                  |
|                         |                  |                  | E65-E68:Obesity and other hyperalimentation                                            | 14.6                    | 17.4                     | E66 Obesity                                                   |                  |
|                         |                  |                  | E10-E14:Diabetes mellitus                                                              | 14.2                    | 16.9                     | E11 Non-insulin-dependent diabetes mellitus                   |                  |
| <b>MC2</b><br>110,200   | 57.6             | 24.2             | M70-M79:Other soft tissue disorders                                                    | 16.9                    | 29.3                     | M75 Shoulder lesions                                          | 0.87 (0.84-0.90) |
|                         |                  |                  | N40-N51:Diseases of male genital organs                                                | 12.1                    | 21.0                     | N40 Hyperplasia of prostate                                   |                  |
|                         |                  |                  | M20-M25:Other joint disorders                                                          | 12.0                    | 20.9                     | M25 Other joint disorders, not elsewhere classified           |                  |
|                         |                  |                  | K20-K31:Diseases of oesophagus, stomach and duodenum                                   | 11.5                    | 20.0                     | K29 Gastritis and duodenitis                                  |                  |
|                         |                  |                  | I80-I89:Diseases of veins, lymphatic vessels and lymph nodes, not elsewhere classified | 10.0                    | 17.4                     | I84 Haemorrhoids                                              |                  |
|                         |                  |                  | K40-K46:Hernia                                                                         | 8.8                     | 15.2                     | K40 Inguinal hernia                                           |                  |

|                       |      |      |                                                                                               |      |      |                                                                     |                  |
|-----------------------|------|------|-----------------------------------------------------------------------------------------------|------|------|---------------------------------------------------------------------|------------------|
|                       |      |      | D10-D36:Benign neoplasms                                                                      | 8.6  | 14.9 | D17 Benign lipomatous neoplasm                                      |                  |
|                       |      |      | M15-M19:Arthrosis                                                                             | 7.7  | 13.4 | M17 Gonarthrosis [arthrosis of knee]                                |                  |
|                       |      |      | K55-K63:Other diseases of intestines                                                          | 6.4  | 11.1 | K62 Other diseases of anus and rectum                               |                  |
| <b>MC3</b><br>103,365 | 54.1 | 20.7 | F40-F48:Neurotic, stress-related and somatoform disorders                                     | 13.5 | 24.9 | F41 Nutritional marasmus                                            | 0.79 (0.74-0.84) |
|                       |      |      | K00-K14:Diseases of oral cavity, salivary glands and jaws                                     | 12.0 | 22.3 | K02 Dental caries                                                   |                  |
|                       |      |      | J40-J47:Chronic lower respiratory diseases                                                    | 9.3  | 17.2 | J44 Other chronic obstructive pulmonary disease                     |                  |
|                       |      |      | J00-J06:Acute upper respiratory infections                                                    | 8.9  | 16.4 | J00 Acute nasopharyngitis [common cold]                             |                  |
|                       |      |      | J30-J39:Other diseases of upper respiratory tract                                             | 8.0  | 14.8 | J30 Vasomotor and allergic rhinitis                                 |                  |
|                       |      |      | L20-L30:Dermatitis and eczema                                                                 | 7.5  | 13.9 | L21 Seborrhoeic dermatitis                                          |                  |
|                       |      |      | G40-G47:Episodic and paroxysmal disorders                                                     | 7.4  | 13.7 | G47 Sleep disorders                                                 |                  |
|                       |      |      | F50-F59:Behavioural syndromes associated with physiological disturbances and physical factors | 6.6  | 12.2 | F52 Sexual dysfunction, not caused by organic disorder or disease   |                  |
|                       |      |      | F30-F39:Mood [affective] disorders                                                            | 6.3  | 11.6 | F32 Depressive episode                                              |                  |
|                       |      |      | B35-B49:Mycoses                                                                               | 4.1  | 7.6  | B35 Dermatophytosis                                                 |                  |
| <b>MC4</b><br>48,140  | 25.2 | 4.7  | H90-H95:Other disorders of ear                                                                | 7.7  | 30.6 | H91 Disorders of sclera and cornea in diseases classified elsewhere | 0.87 (0.83-0.91) |
|                       |      |      | H53-H54:Visual disturbances and blindness                                                     | 3.9  | 15.5 | H54 Blindness and low vision                                        |                  |
|                       |      |      | B00-B09:Viral infections characterized by skin and                                            | 3.5  | 13.9 | B07 Viral warts                                                     |                  |

|                      |      |     |                                                                                       |     |      |                                                                    |                  |
|----------------------|------|-----|---------------------------------------------------------------------------------------|-----|------|--------------------------------------------------------------------|------------------|
|                      |      |     | mucous membrane lesions                                                               |     |      |                                                                    |                  |
|                      |      |     | L60-L75:Disorders of skin appendages                                                  | 3.5 | 13.9 | L72 Follicular cysts of skin and subcutaneous tissue               |                  |
|                      |      |     | H10-H13:Disorders of conjunctiva                                                      | 3.0 | 12.0 | H10 Conjunctivitis                                                 |                  |
|                      |      |     | H49-H52:Disorders of ocular muscles, binocular movement, accommodation and refraction | 2.8 | 11.2 | H52 Disorders of refraction and accommodation                      |                  |
|                      |      |     | L80-L99:Other disorders of the skin and subcutaneous tissue                           | 2.5 | 10.0 | L82 Seborrhoeic keratosis                                          |                  |
|                      |      |     | L00-L08:Infections of the skin and subcutaneous tissue                                | 2.1 | 8.3  | L02 Cutaneous abscess, furuncle and carbuncle                      |                  |
|                      |      |     | H00-H06:Disorders of eyelid, lacrimal system and orbit                                | 1.6 | 6.5  | H00 Hordeolum and chalazion                                        |                  |
| <b>MC5</b><br>30,315 | 15.9 | 2.9 | I30-I52:Other forms of heart disease                                                  | 6.9 | 43.7 | I45 Other conduction disorders                                     | 0.77 (0.73-0.82) |
|                      |      |     | I20-I25:Ischaemic heart diseases                                                      | 5.0 | 31.0 | I25 Chronic ischaemic heart disease                                |                  |
|                      |      |     | I70-I79:Diseases of arteries, arterioles and capillaries                              | 2.4 | 15.2 | I73 Other peripheral vascular diseases                             |                  |
|                      |      |     | I60-I69:Cerebrovascular diseases                                                      | 1.8 | 11.4 | I64 Stroke, not specified as haemorrhage or infarction             |                  |
|                      |      |     | H30-H36:Disorders of choroid and retina                                               | 1.7 | 11.0 | H36 Retinal disorders in diseases classified elsewhere             |                  |
|                      |      |     | N17-N19:Renal failure                                                                 | 1.5 | 9.2  | N18 Chronic renal failure                                          |                  |
| <b>MC6</b><br>29,907 | 15.6 | 1.5 | M05-M14:Inflammatory polyarthropathies                                                | 5.4 | 34.5 | M10 Gout                                                           | 0.66 (0.60-0.72) |
|                      |      |     | S80-S89:Injuries to the knee and lower leg                                            | 3.2 | 20.7 | S83 Dislocation, sprain and strain of joints and ligaments of knee |                  |

|                      |      |     |                                                                     |     |      |                                                                                    |                  |
|----------------------|------|-----|---------------------------------------------------------------------|-----|------|------------------------------------------------------------------------------------|------------------|
|                      |      |     | L40-L45: Papulosquamous disorders                                   | 3.2 | 20.5 | L40 Psoriasis                                                                      |                  |
|                      |      |     | G50-G59: Nerve, nerve root and plexus disorders                     | 2.7 | 17.4 | G56 Mononeuropathies of upper limb                                                 |                  |
|                      |      |     | M65-M68: Disorders of synovium and tendon                           | 2.6 | 16.8 | M65 Synovitis and tenosynovitis                                                    |                  |
| <b>MC7</b><br>19,313 | 10.1 | 0.9 | K70-K77: Diseases of liver                                          | 5.2 | 51.9 | K76 Other diseases of liver                                                        | 1.00             |
|                      |      |     | B15-B19: Viral hepatitis                                            | 3.2 | 32.0 | B18 Chronic viral hepatitis                                                        |                  |
|                      |      |     | K80-K87: Disorders of gallbladder, biliary tract and pancreas       | 2.6 | 25.8 | K80 Cholelithiasis                                                                 |                  |
| <b>MC8</b><br>19,160 | 10.0 | 0.7 | T08-T14: Injuries to unspecified part of trunk, limb or body region | 4.1 | 41.0 | T14 Injury of unspecified body region                                              | 0.80 (0.75-0.86) |
|                      |      |     | L50-L54: Urticaria and erythema                                     | 2.1 | 20.8 | L50 Urticaria                                                                      |                  |
|                      |      |     | S60-S69: Injuries to the wrist and hand                             | 1.9 | 18.5 | S61 Open wound of wrist and hand                                                   |                  |
|                      |      |     | S90-S99: Injuries to the ankle and foot                             | 1.4 | 13.9 | S93 Dislocation, sprain and strain of joints and ligaments at ankle and foot level |                  |
|                      |      |     | S00-S09: Injuries to the head                                       | 1.3 | 13.3 | S01 Open wound of head                                                             |                  |
| <b>MC9</b><br>13,752 | 7.2  | 0.3 | E00-E07: Disorders of thyroid gland                                 | 2.4 | 32.8 | E03 Other hypothyroidism                                                           | 0.97 (0.96-0.98) |
|                      |      |     | K50-K52: Noninfective enteritis and colitis                         | 1.7 | 24.1 | K52 Other non-infective gastro-enteritis and colitis                               |                  |
|                      |      |     | D50-D53: Nutritional anaemias                                       | 1.2 | 16.3 | D50 Iron deficiency anaemia                                                        |                  |
|                      |      |     | Q38-Q45: Other congenital malformations of the digestive system     | 1.2 | 16.2 | Q40 Other congenital malformations of upper alimentary tract                       |                  |
|                      |      |     | D70-D77: Other diseases of blood and blood-forming organs           | 1.1 | 15.3 | D72 Other disorders of white blood cells                                           |                  |
| <b>MC10</b>          | 7.1  | 0.5 | J20-J22: Other acute lower                                          | 2.6 | 37.2 | J20 Acute bronchitis                                                               | 0.86 (0.82-0.91) |

|                       |     |     |                                                                        |     |      |                                                                  |                  |
|-----------------------|-----|-----|------------------------------------------------------------------------|-----|------|------------------------------------------------------------------|------------------|
| 13,490                |     |     | respiratory infections                                                 |     |      |                                                                  |                  |
|                       |     |     | A00-A09: Intestinal infectious diseases                                | 2.4 | 34.2 | A09 Diarrhoea and gastro-enteritis of presumed infectious origin |                  |
|                       |     |     | J09-J18: Influenza and pneumonia                                       | 1.6 | 22.0 | J11 Influenza, virus not identified                              |                  |
|                       |     |     | B25-B34: Other viral diseases                                          | 1.0 | 14.6 | B34 Viral infection of unspecified site                          |                  |
| <b>MC11</b><br>13,434 | 7.0 | 0.4 | H60-H62: Diseases of external ear                                      | 3.9 | 55.3 | H61 Other disorders of external ear                              | 0.88 (0.85-0.92) |
|                       |     |     | H65-H75: Diseases of middle ear and mastoid                            | 2.1 | 30.5 | H65 Nonsuppurative otitis media                                  |                  |
|                       |     |     | H80-H83: Diseases of inner ear                                         | 1.4 | 19.9 | H81 Disorders of vestibular function                             |                  |
| <b>MC12</b><br>10,952 | 5.7 | 0.1 | N20-N23: Urolithiasis                                                  | 4.3 | 75.5 | N20 Calculus of kidney and ureter                                | 0.99 (0.98-1.00) |
|                       |     |     | N30-N39: Other diseases of urinary system                              | 1.6 | 27.1 | N39 Other disorders of urinary system                            |                  |
| <b>MC13</b><br>8,794  | 4.6 | 0.3 | M45-M49: Spondylopathies                                               | 3.1 | 66.7 | M47 Spondylosis                                                  | 0.99 (0.95-1.00) |
|                       |     |     | M40-M43: Deforming dorsopathies                                        | 1.8 | 38.9 | M41 Scoliosis                                                    |                  |
| <b>MC14</b><br>7,444  | 3.9 | 0.2 | H40-H42: Glaucoma                                                      | 2.3 | 59.6 | H40 Glaucoma                                                     | 0.91 (0.88-0.95) |
|                       |     |     | H25-H28: Disorders of lens                                             | 1.8 | 45.4 | H25 Senile cataract                                              |                  |
| <b>MC15</b><br>6,161  | 3.2 | 0.0 | T51-T65: Toxic effects of substances chiefly nonmedicinal as to source | 2.1 | 65.8 | T65 Toxic effect of other and unspecified substances             | 0.90 (0.87-0.93) |
|                       |     |     | F20-F29: Schizophrenia, schizotypal and delusional disorders           | 1.1 | 35.3 | F20 Schizophrenia                                                |                  |

\*\*Approximately unbiased (AU) probability-value
