# Supplementary material for: Comparative analysis of methods for identifying multimorbidity patterns: a study of ‘real-world’ data
Source: PubMed Central journal article supplement — BMJ Open. 2018 Mar 22;8(3):e018986. doi: 10.1136/bmjopen-2017-018986 (PMC5875653; doi:10.1136/bmjopen-2017-018986), 2018-03-22
Supplement: bmjopen-2017-018986supp006.pdf [file bmjopen-2017-018986supp006.pdf]

**Appendix 6.** Factors in women aged 45-64 years (n= 217,823).

| Factorial order number, n | Prevalence 1, %* | Prevalence 2, %† | Blocks of diagnoses                                      | Prevalence in group, % | Prevalence in factor, % | Variance proportion, % | Cumulative Variance proportion, % |
|---------------------------|------------------|------------------|----------------------------------------------------------|------------------------|-------------------------|------------------------|-----------------------------------|
| <b>WF1^</b><br>130,072    | 59.7             | 25.4             | M50-M54:Other dorsopathies                               | 35.8                   | 59.9                    | 10.6                   | 69.1                              |
|                           |                  |                  | M70-M79:Other soft tissue disorders                      | 27.0                   | 45.2                    |                        |                                   |
|                           |                  |                  | M15-M19:Arthrosis                                        | 15.7                   | 26.2                    |                        |                                   |
|                           |                  |                  | G50-G59:Nerve, nerve root and plexus disorders           | 8.5                    | 14.3                    |                        |                                   |
|                           |                  |                  | M45-M49:Spondylopathies                                  | 4.3                    | 7.3                     |                        |                                   |
|                           |                  |                  | M40-M43:Deforming dorsopathies                           | 3.8                    | 6.4                     |                        |                                   |
| <b>WF2</b><br>82,301      | 37.8             | 12.0             | I10-I15:Hypertensive diseases                            | 25.6                   | 67.6                    | 7.0                    | 84.5                              |
|                           |                  |                  | E65-E68:Obesity and other hyperalimentation              | 19.0                   | 50.2                    |                        |                                   |
|                           |                  |                  | E10-E14:Diabetes mellitus                                | 7.7                    | 20.3                    |                        |                                   |
| <b>WF3</b><br>71,436      | 32.8             | 8.1              | I10-I15:Hypertensive diseases                            | 25.6                   | 78.0                    | 20.2                   | 58.6                              |
|                           |                  |                  | E10-E14:Diabetes mellitus                                | 7.7                    | 23.4                    |                        |                                   |
|                           |                  |                  | I30-I52:Other forms of heart disease                     | 4.4                    | 13.3                    |                        |                                   |
|                           |                  |                  | H25-H28:Disorders of lens                                | 1.7                    | 5.3                     |                        |                                   |
|                           |                  |                  | H30-H36:Disorders of choroid and retina                  | 1.2                    | 3.6                     |                        |                                   |
|                           |                  |                  | I70-I79:Diseases of arteries, arterioles and capillaries | 1.1                    | 3.2                     |                        |                                   |
|                           |                  |                  | I20-I25:Ischaemic heart diseases                         | 1.0                    | 3.1                     |                        |                                   |
| <b>WF4</b><br>60,027      | 27.6             | 5.9              | J00-J06:Acute upper respiratory infections               | 12.6                   | 45.8                    | 38.3                   | 38.3                              |
|                           |                  |                  | N30-N39:Other diseases of urinary system                 | 5.9                    | 21.3                    |                        |                                   |
|                           |                  |                  | H60-H62:Diseases of external ear                         | 3.6                    | 13.1                    |                        |                                   |
|                           |                  |                  | J20-J22:Other acute lower respiratory infections         | 3.4                    | 12.2                    |                        |                                   |
|                           |                  |                  | A00-A09:Intestinal infectious diseases                   | 2.7                    | 10.0                    |                        |                                   |
|                           |                  |                  | H65-H75:Diseases of middle ear and mastoid               | 2.5                    | 9.2                     |                        |                                   |

|                      |      |     |                                                                            |      |       |     |       |
|----------------------|------|-----|----------------------------------------------------------------------------|------|-------|-----|-------|
|                      |      |     | J09-J18:Influenza and pneumonia                                            | 1.7  | 6.1   |     |       |
|                      |      |     | B25-B34:Other viral diseases                                               | 1.3  | 4.8   |     |       |
|                      |      |     | M60-M63:Disorders of muscles                                               | 1.2  | 4.4   |     |       |
| <b>WF5</b><br>56,671 | 26.0 | 5.3 | L20-L30:Dermatitis and eczema                                              | 9.3  | 35.7  | 8.4 | 77.5  |
|                      |      |     | B35-B49:Mycoses                                                            | 5.7  | 22.1  |     |       |
|                      |      |     | L60-L75:Disorders of skin appendages                                       | 4.8  | 18.3  |     |       |
|                      |      |     | H53-H54:Visual disturbances and blindness                                  | 4.4  | 16.9  |     |       |
|                      |      |     | H10-H13:Disorders of conjunctiva                                           | 3.8  | 14.6  |     |       |
|                      |      |     | L80-L99:Other disorders of the skin and subcutaneous tissue                | 3.3  | 12.8  |     |       |
|                      |      |     | H55-H59:Other disorders of eye and adnexa                                  | 1.2  | 4.7   |     |       |
| <b>WF6</b><br>46,391 | 21.3 | 3.8 | K20-K31:Diseases of oesophagus, stomach and duodenum                       | 11.4 | 53.6  | 5.9 | 90.4  |
|                      |      |     | K40-K46:Hernia                                                             | 5.7  | 26.7  |     |       |
|                      |      |     | K80-K87:Disorders of gallbladder, biliary tract and pancreas               | 4.0  | 18.8  |     |       |
|                      |      |     | K70-K77:Diseases of liver                                                  | 2.9  | 13.8  |     |       |
|                      |      |     | Q38-Q45:Other congenital malformations of the digestive system             | 1.5  | 7.1   |     |       |
| <b>WF7</b><br>41,492 | 19.0 | 0.6 | M80-M85:Disorders of bone density and structure                            | 11.3 | 59.5  | 5.1 | 95.5  |
|                      |      |     | D50-D53:Nutritional anaemias                                               | 8.3  | 43.5  |     |       |
| <b>WF8</b><br>40,619 | 18.6 | 0.0 | F10-F19:Mental and behavioural disorders due to psychoactive substance use | 18.6 | 100.0 | 4.3 | 99.8  |
| <b>WF9</b><br>23,729 | 10.9 | 0.6 | J40-J47:Chronic lower respiratory diseases                                 | 8.2  | 74.9  | 4.1 | 103.9 |
|                      |      |     | J20-J22:Other acute lower respiratory infections                           | 3.4  | 30.8  |     |       |

\*Individuals from  $\geq 1$  diagnosis in the factor/ † Individuals from with  $\geq 2$  diagnosis in the factor

^ Abbreviation of sex, method and number (WF1: Women Factor 1)
