# Supplementary material for: Comparative analysis of methods for identifying multimorbidity patterns: a study of ‘real-world’ data
Source: PubMed Central journal article supplement — BMJ Open. 2018 Mar 22;8(3):e018986. doi: 10.1136/bmjopen-2017-018986 (PMC5875653; doi:10.1136/bmjopen-2017-018986), 2018-03-22
Supplement: bmjopen-2017-018986supp007.pdf [file bmjopen-2017-018986supp007.pdf]

**Appendix 7. Factors in men aged 45-64 years (n= 191,171).**

| Factorial order number, n         | Prevalence 1, %* | Prevalence 2, %† | Blocks of diagnoses                                                        | Prevalence in age, % | Prevalence in factor, % | Variance proportion, % | Cumulative Variance proportion, % |
|-----------------------------------|------------------|------------------|----------------------------------------------------------------------------|----------------------|-------------------------|------------------------|-----------------------------------|
| <b>MF1<sup>^</sup></b><br>118,037 | 61.7             | 26.1             | E70-E90:Metabolic disorders                                                | 42.2                 | 68.3                    | 5.1                    | 94.8                              |
|                                   |                  |                  | I10-I15:Hypertensive diseases                                              | 32.6                 | 52.7                    |                        |                                   |
|                                   |                  |                  | E65-E68:Obesity and other hyperalimentation                                | 14.6                 | 23.6                    |                        |                                   |
|                                   |                  |                  | M05-M14:Inflammatory polyarthropathies                                     | 5.4                  | 8.7                     |                        |                                   |
| <b>MF2</b><br>75,315              | 39.4             | 8.7              | I10-I15:Hypertensive diseases                                              | 32.5                 | 82.6                    | 28.5                   | 28.5                              |
|                                   |                  |                  | I30-I52:Other forms of heart disease                                       | 6.9                  | 17.6                    |                        |                                   |
|                                   |                  |                  | I20-I25:Ischaemic heart diseases                                           | 5.0                  | 12.6                    |                        |                                   |
|                                   |                  |                  | I70-I79:Diseases of arteries, arterioles and capillaries                   | 2.4                  | 6.1                     |                        |                                   |
|                                   |                  |                  | I60-I69:Cerebrovascular diseases                                           | 1.8                  | 4.6                     |                        |                                   |
|                                   |                  |                  | N17-N19:Renal failure                                                      | 1.5                  | 3.7                     |                        |                                   |
| <b>MF3</b><br>73,638              | 38.5             | 4.4              | F10-F19:Mental and behavioural disorders due to psychoactive substance use | 33.6                 | 87.2                    | 5.3                    | 89.6                              |
|                                   |                  |                  | K70-K77:Diseases of liver                                                  | 5.2                  | 13.6                    |                        |                                   |
|                                   |                  |                  | B15-B19:Viral hepatitis                                                    | 3.2                  | 8.4                     |                        |                                   |
|                                   |                  |                  | F20-F29:Schizophrenia, schizotypal and delusional disorders                | 1.1                  | 2.9                     |                        |                                   |
| <b>MF4</b><br>66,303              | 34.7             | 5.1              | M50-M54:Other dorsopathies                                                 | 27.8                 | 80.2                    | 7.3                    | 77.8                              |
|                                   |                  |                  | M15-M19:Arthrosis                                                          | 7.7                  | 22.2                    |                        |                                   |
|                                   |                  |                  | M45-M49:Spondylopathies                                                    | 3.1                  | 8.8                     |                        |                                   |
|                                   |                  |                  | M40-M43:Deforming dorsopathies                                             | 1.8                  | 5.2                     |                        |                                   |
| <b>MF5</b><br>34,903              | 18.3             | 2.5              | L20-L30:Dermatitis and eczema                                              | 7.5                  | 41.3                    | 22.2                   | 50.7                              |
|                                   |                  |                  | B35-B49:Mycoses                                                            | 4.1                  | 22.5                    |                        |                                   |
|                                   |                  |                  | H53-H54:Visual disturbances and                                            | 3.9                  | 21.3                    |                        |                                   |

|                      |      |     |                                                                    |      |       |      |       |
|----------------------|------|-----|--------------------------------------------------------------------|------|-------|------|-------|
|                      |      |     | blindness                                                          |      |       |      |       |
|                      |      |     | H10-H13:Disorders of conjunctiva                                   | 3.0  | 16.6  |      |       |
|                      |      |     | L80-L99:Other disorders of the skin and subcutaneous tissue        | 2.5  | 13.8  |      |       |
| <b>MF6</b><br>27,697 | 14.5 | 1.8 | J00-J06:Acute upper respiratory infections                         | 8.9  | 61.3  | 10.4 | 61.0  |
|                      |      |     | J20-J22:Other acute lower respiratory infections                   | 2.6  | 18.1  |      |       |
|                      |      |     | A00-A09:Intestinal infectious diseases                             | 2.4  | 16.7  |      |       |
|                      |      |     | J09-J18:Influenza and pneumonia                                    | 1.6  | 10.7  |      |       |
|                      |      |     | B25-B34:Other viral diseases                                       | 1.0  | 7.1   |      |       |
| <b>MF7</b><br>33,568 | 17.6 | 2.2 | E10-E14:Diabetes mellitus                                          | 14.2 | 80.8  | 9.5  | 70.5  |
|                      |      |     | H40-H42:Glaucoma                                                   | 2.3  | 13.2  |      |       |
|                      |      |     | H25-H28:Disorders of lens                                          | 1.8  | 10.1  |      |       |
|                      |      |     | H30-H36:Disorders of choroid and retina                            | 1.7  | 10.0  |      |       |
| <b>MF8</b><br>25,121 | 13.1 | 0.7 | K20-K31:Diseases of oesophagus, stomach and duodenum               | 11.5 | 87.8  | 6.5  | 84.3  |
|                      |      |     | D50-D53:Nutritional anaemias                                       | 1.2  | 8.9   |      |       |
|                      |      |     | Q38-Q45:Other congenital malformations of the digestive system     | 1.2  | 8.9   |      |       |
| <b>MF9</b><br>15,974 | 8.4  | 0.4 | T08-T14:Injuries to unspecified part of trunk, limb or body region | 4.1  | 49.2  | 5.0  | 99.8  |
|                      |      |     | S80-S89:Injuries to the knee and lower leg                         | 3.3  | 38.7  |      |       |
|                      |      |     | S90-S99:Injuries to the ankle and foot                             | 1.4  | 16.7  |      |       |
| <b>MF10</b><br>8,271 | 4.3  | 0.0 | N20-N23:Urolithiasis                                               | 4.3  | 100.0 | 3.9  | 103.7 |

\*Individuals from  $\geq 1$  diagnosis in the factor/ † Individuals from with  $\geq 2$  diagnosis in the factor

^ Abbreviation of sex, method and number (MF1: Men Factor 1)
