# Supplementary figures and images for: Comparative analysis of methods for identifying multimorbidity patterns: a study of ‘real-world’ data
Source: PubMed Central journal article supplement — BMJ Open. 2018 Mar 22;8(3):e018986. doi: 10.1136/bmjopen-2017-018986 (PMC5875653; doi:10.1136/bmjopen-2017-018986), 2018-03-22

## Appendix 1. Study Flow Chart.

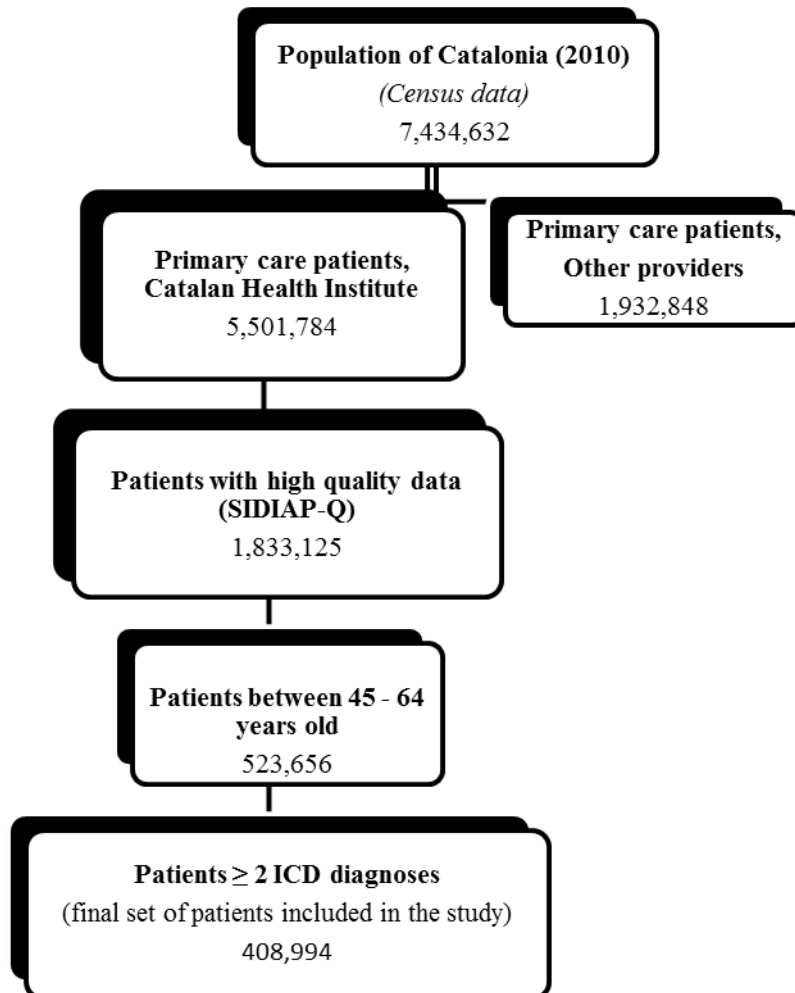

Supplement: bmjopen-2017-018986supp001.pdf [file bmjopen-2017-018986supp001.pdf]

## Appendix 2. Cluster dendrogram in women aged 45-64 years.

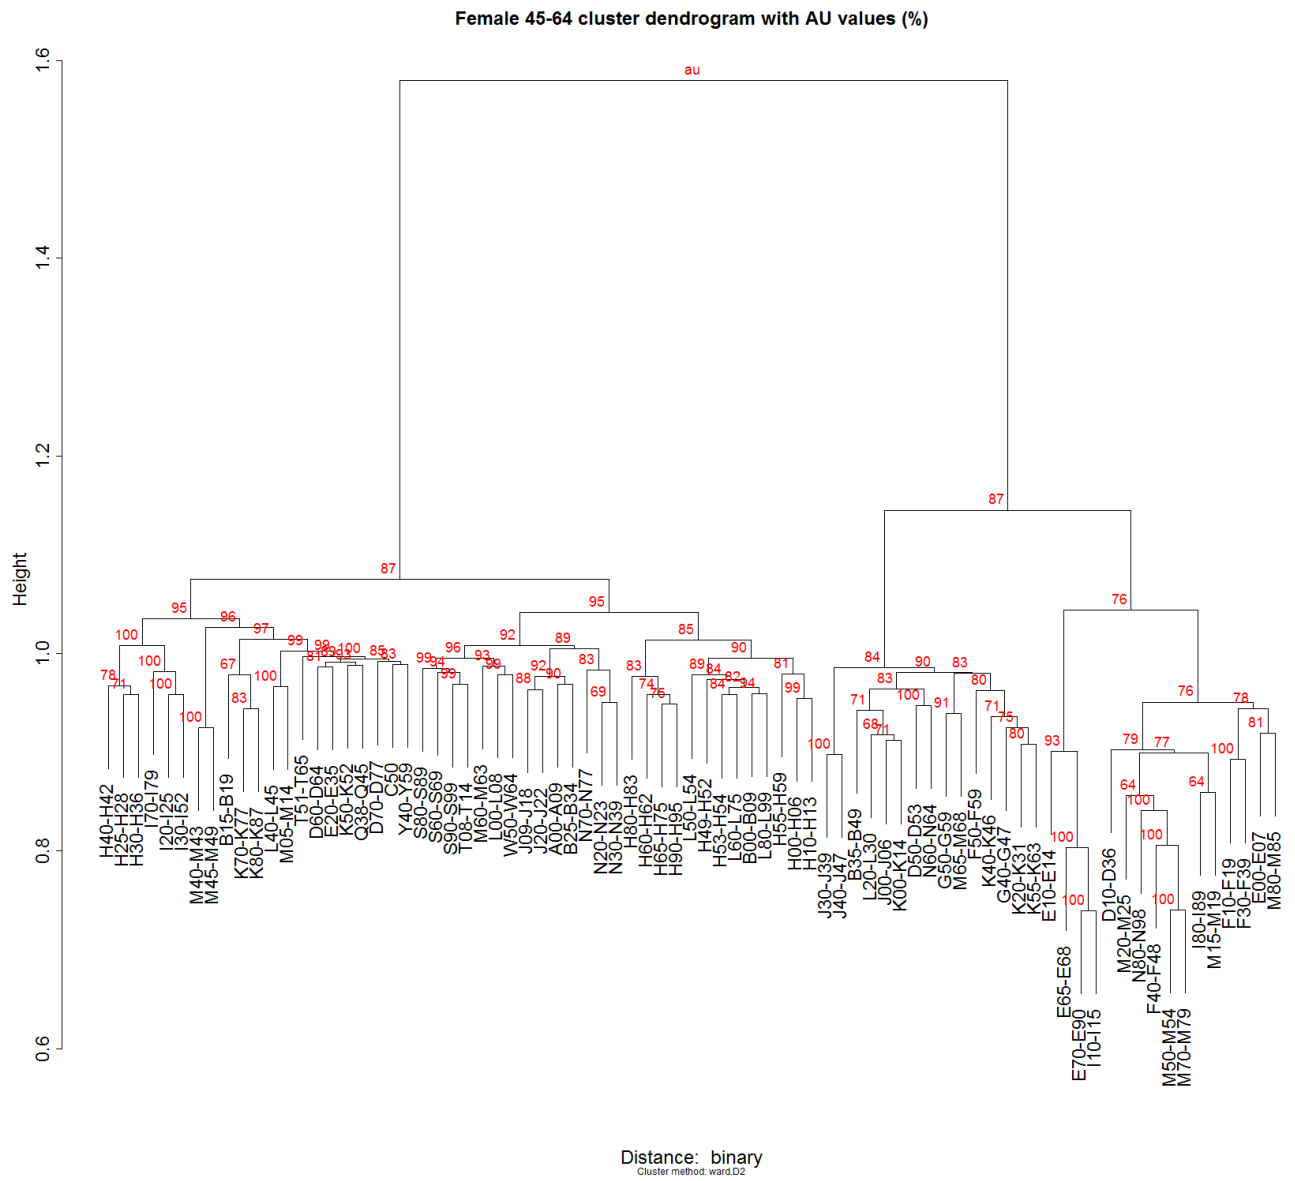

Supplement: bmjopen-2017-018986supp002.pdf [file bmjopen-2017-018986supp002.pdf]
